# Supplementary material
Source: MDPI journal article supplement (https://www.mdpi.com/2673-4117/4/4/141)
Supplement: s1 [file s1]

# Supporting Information for:

## Steady vs. Dynamic Contributions of Different Doped Conducting Polymers in the Principal Components of an Electronic Nose's Response

Wiem Haj Ammar <sup>1</sup>, Aicha Boujnah <sup>1</sup>, Aimen Boubaker <sup>1</sup>, Adel Kalboussi <sup>1</sup>, Kamal Lmimouni <sup>2</sup> and Sébastien Pecqueur <sup>2,\*</sup>

- <sup>1</sup> Department of Physics, University of Monastir Tunisia, Monastir 5000, Tunisia  
<sup>2</sup> Institute of Electronics, Microelectronics and Nanotechnology (IEMN, UMR 8520) | University Lille, CNRS, University Polytechnique Hauts-de-France , F-59000 Lille, France; kamal.lmimouni@univ-lille.fr  
\* Correspondence: sebastien.pecqueur@iemn.fr

PCA scores (a), variance for the different PC (b) and their loadings (c) are organized in the different supporting figures by acquisition time for both information descriptors  $\alpha_1$  and  $\alpha_2$  such as:

|                                        |           | Descriptors |            |
|----------------------------------------|-----------|-------------|------------|
|                                        |           | $\alpha_1$  | $\alpha_2$ |
| Acquisition Time Interval (in seconds) | [0;9]     | Figure S1   | Figure S19 |
|                                        | [10;19]   | Figure S2   | Figure S20 |
|                                        | [20;29]   | Figure S3   | Figure S21 |
|                                        | [30;39]   | Figure S4   | Figure S22 |
|                                        | [40;49]   | Figure S5   | Figure S23 |
|                                        | [50;59]   | Figure S6   | Figure S24 |
|                                        | [60;69]   | Figure S7   | Figure S25 |
|                                        | [70;79]   | Figure S8   | Figure S26 |
|                                        | [80;89]   | Figure S9   | Figure S27 |
|                                        | [90;99]   | Figure S10  | Figure S28 |
|                                        | [100;109] | Figure S11  | Figure S29 |
|                                        | [110;119] | Figure S12  | Figure S30 |
|                                        | [120;129] | Figure S13  | Figure S31 |
|                                        | [130;139] | Figure S14  | Figure S32 |
|                                        | [140;149] | Figure S15  | Figure S33 |
|                                        | [150;159] | Figure S16  | Figure S34 |
|                                        | [160;169] | Figure S17  | Figure S35 |
|                                        | [170;179] | Figure S18  | Figure S36 |

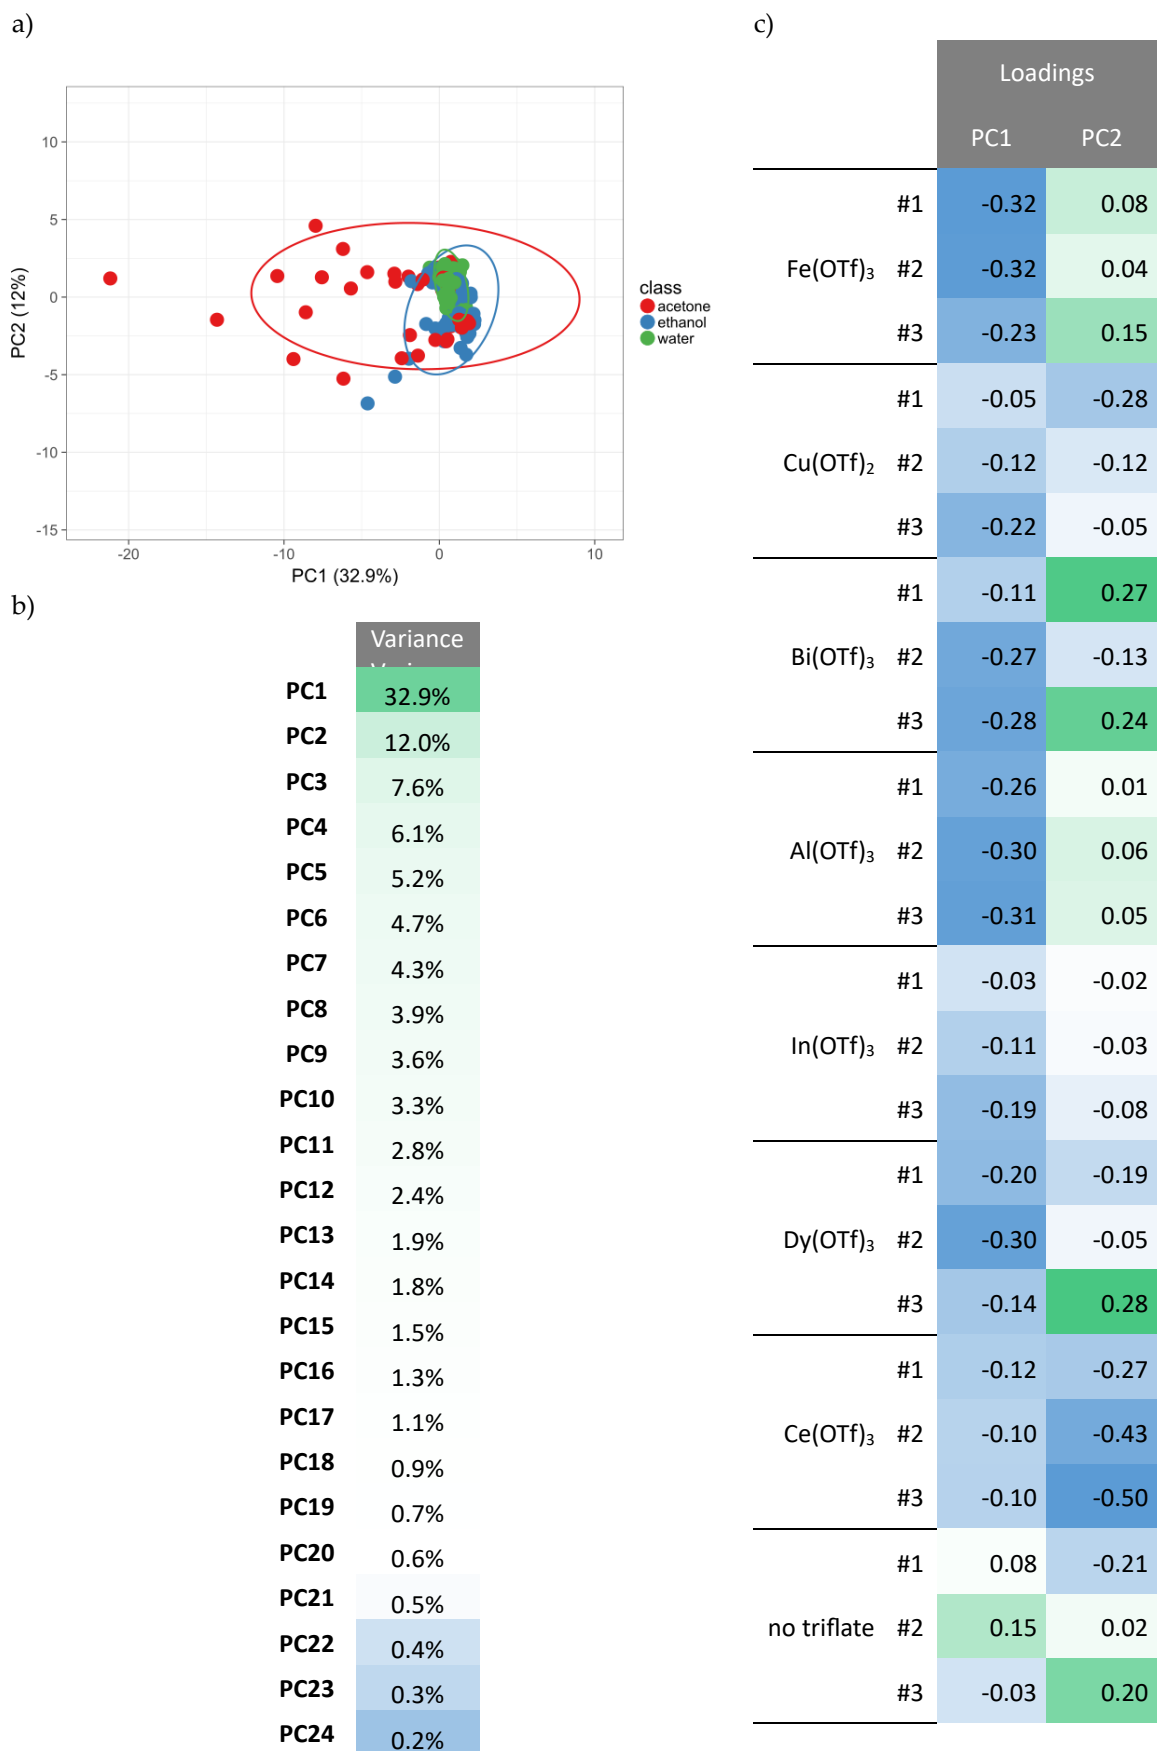

**Figure S1. PCA on  $\alpha_1$ , for R is measured at different time interval [0s;9s] | a, PCA scores with 95% confidence ellipsoids. b, Individual variance for the different PC. c, PCA loadings of the different sensing elements' response for PC1 and PC2.**

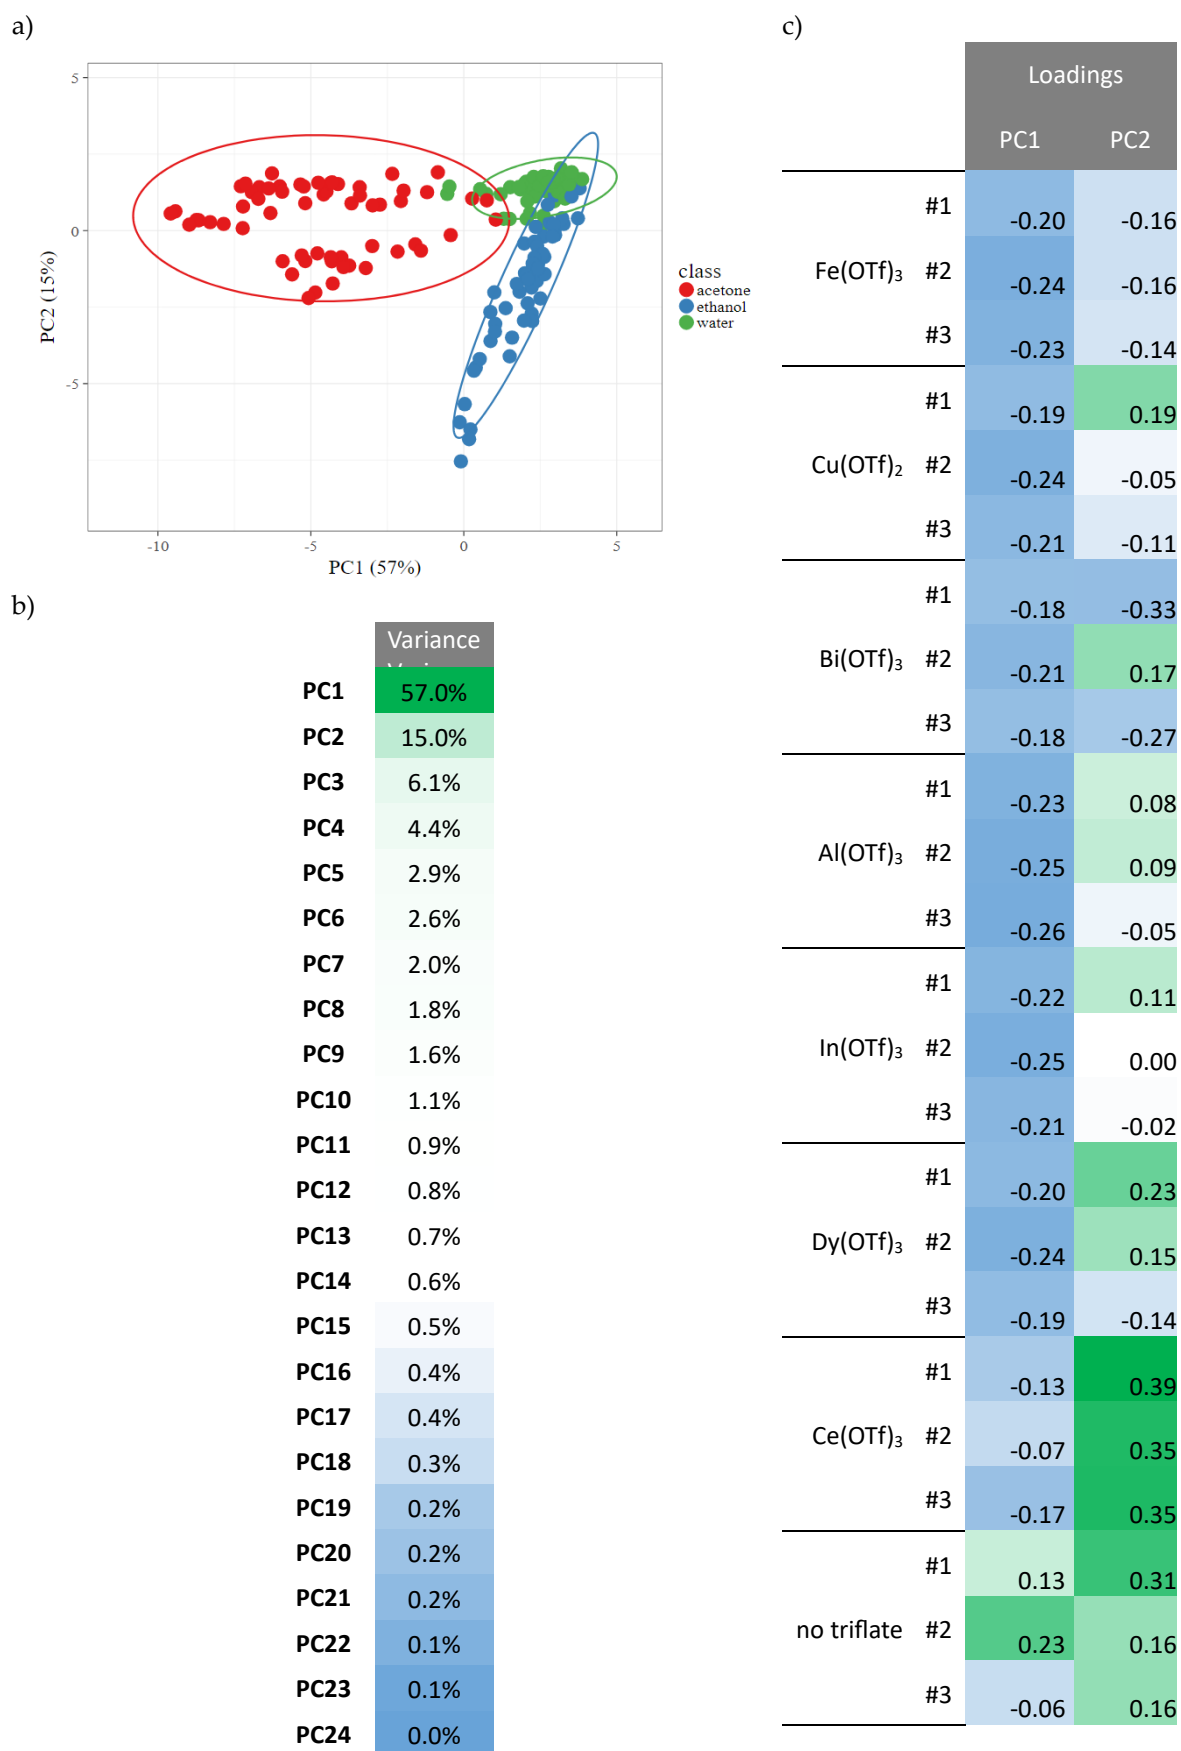

**Figure S2. PCA on  $\alpha_1$ , for R is measured at different time interval [10s;19s] | a, PCA scores with 95% confidence ellipsoids. b, Individual variance for the different PC. c, PCA loadings of the different sensing elements' response for PC1 and PC2.**

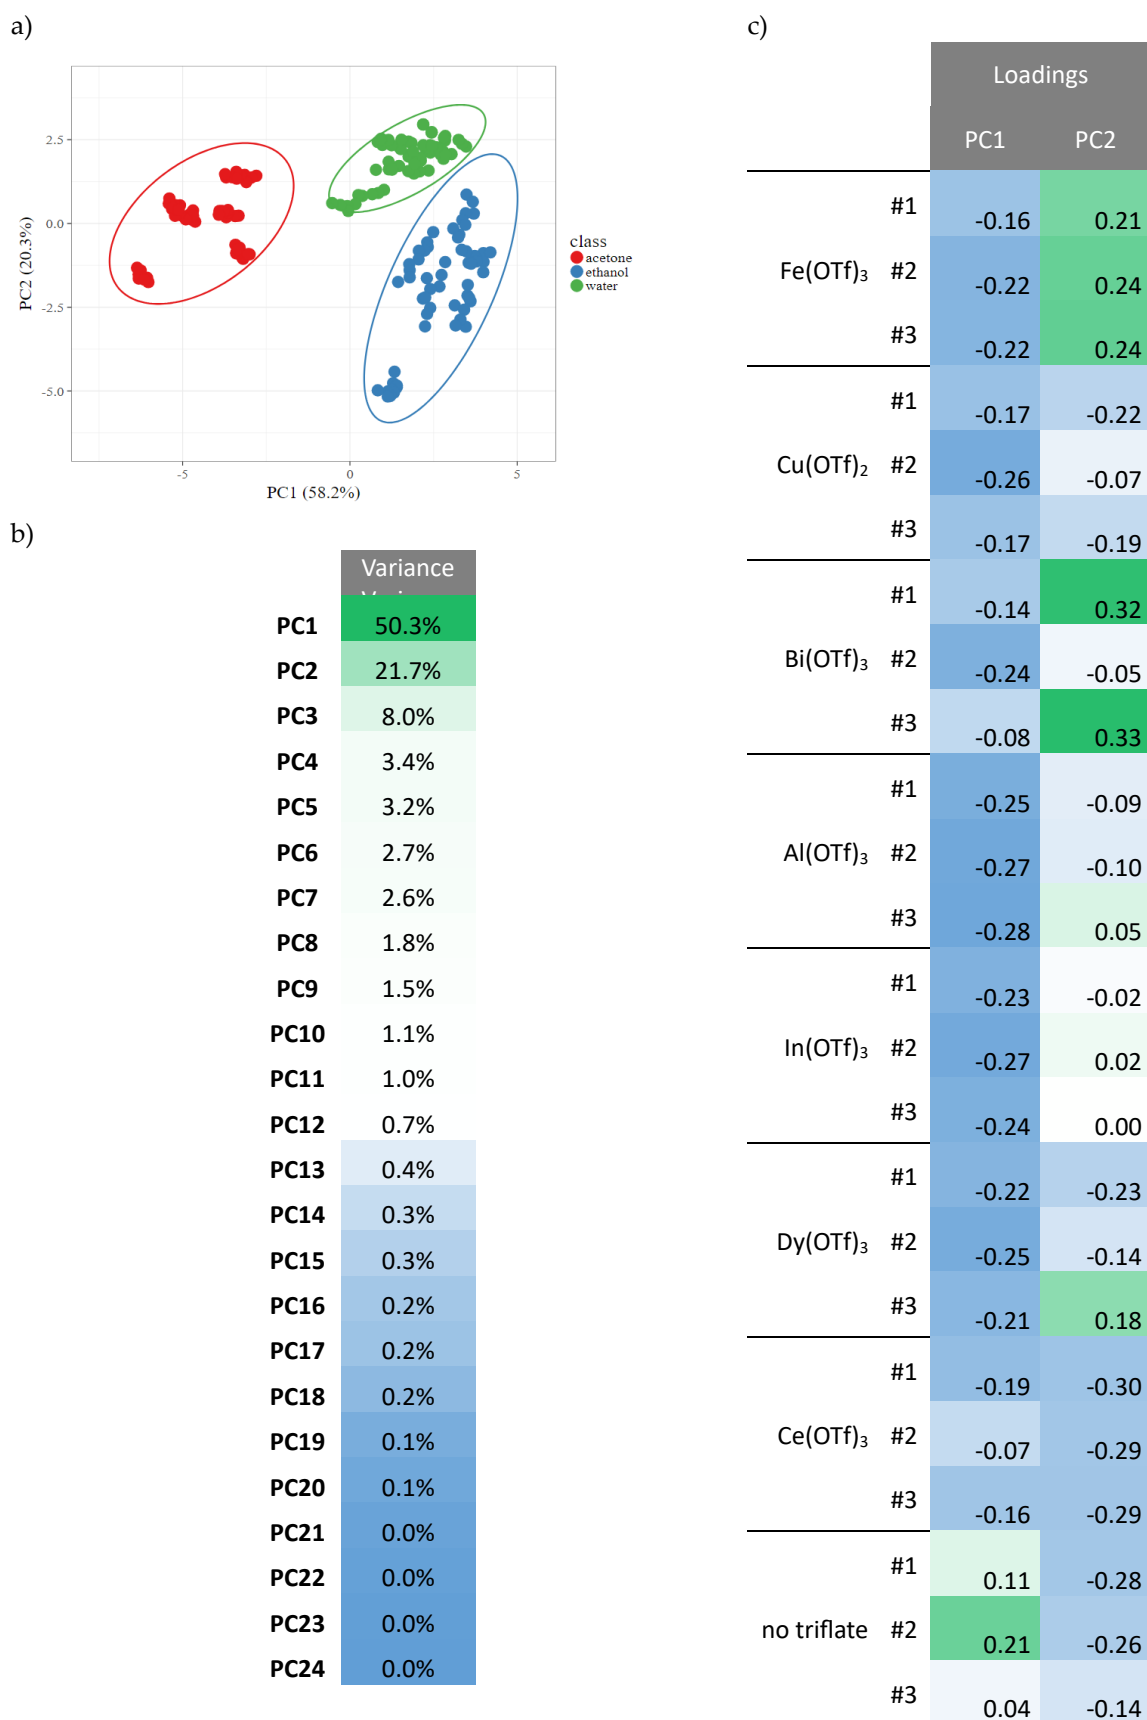

**Figure S3. PCA on  $\alpha_1$ , for R is measured at different time interval [20s;29s] | a, PCA scores with 95% confidence ellipsoids. b, Individual variance for the different PC. c, PCA loadings of the different sensing elements' response for PC1 and PC2.**

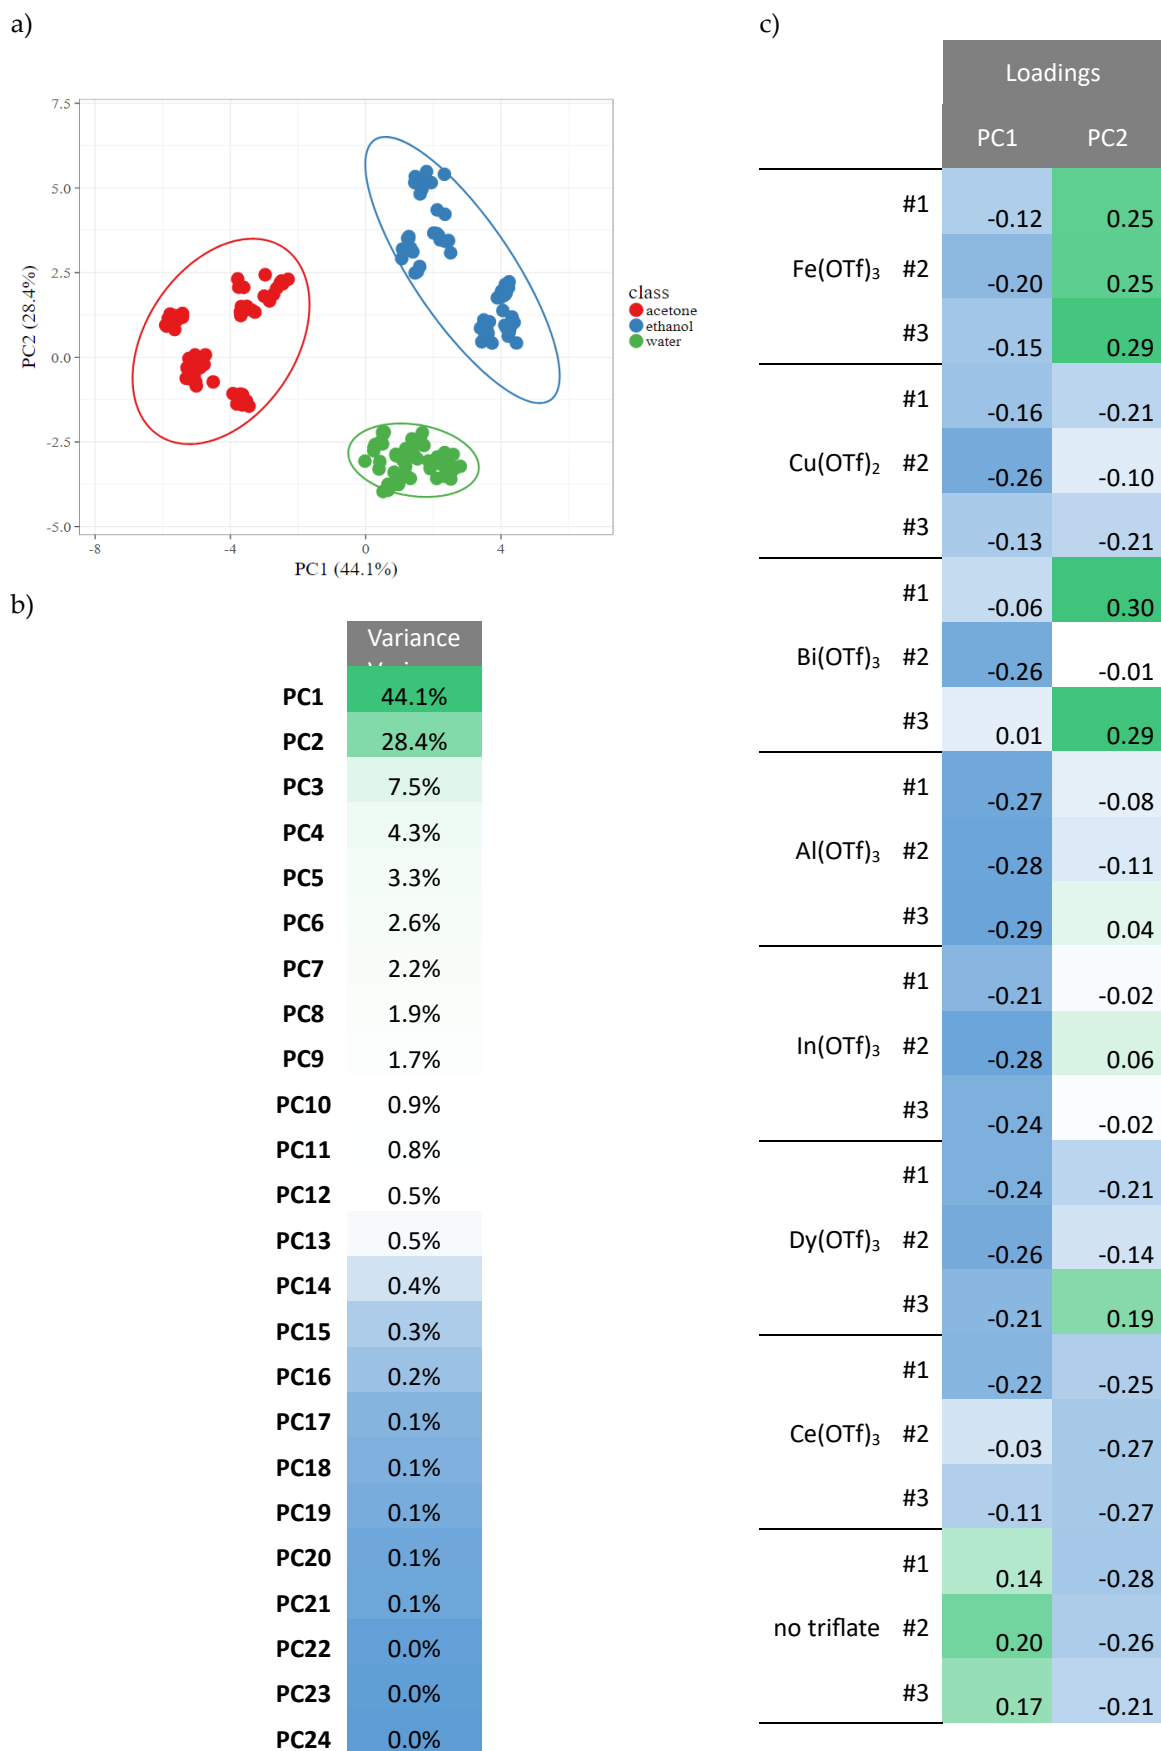

**Figure S4. PCA on  $\alpha_1$ , for R is measured at different time interval [30s;39s] | a, PCA scores with 95% confidence ellipsoids. b, Individual variance for the different PC. c, PCA loadings of the different sensing elements' response for PC1 and PC2.**

a)

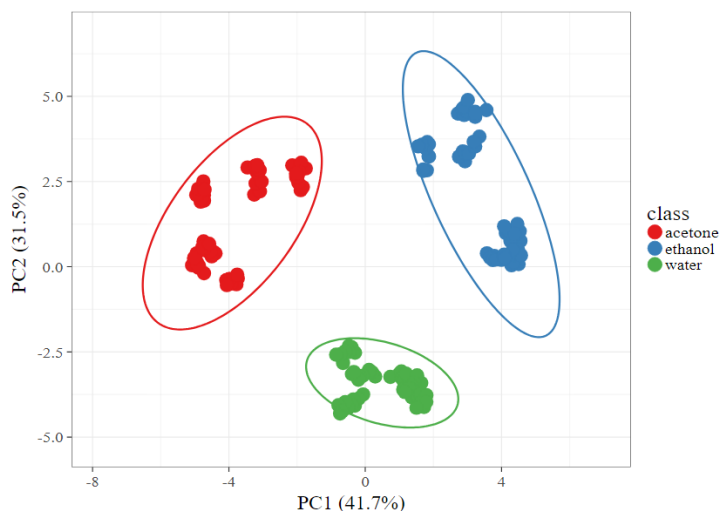

b)

|      | Variance |
|------|----------|
| PC1  | 41.7%    |
| PC2  | 31.5%    |
| PC3  | 7.2%     |
| PC4  | 4.2%     |
| PC5  | 3.6%     |
| PC6  | 2.6%     |
| PC7  | 2.2%     |
| PC8  | 1.9%     |
| PC9  | 1.4%     |
| PC10 | 0.8%     |
| PC11 | 0.8%     |
| PC12 | 0.5%     |
| PC13 | 0.4%     |
| PC14 | 0.3%     |
| PC15 | 0.2%     |
| PC16 | 0.2%     |
| PC17 | 0.1%     |
| PC18 | 0.1%     |
| PC19 | 0.1%     |
| PC20 | 0.1%     |
| PC21 | 0.0%     |
| PC22 | 0.0%     |
| PC23 | 0.0%     |
| PC24 | 0.0%     |

c)

|                      |    | Loadings |       |
|----------------------|----|----------|-------|
|                      |    | PC1      | PC2   |
| Fe(OTf) <sub>3</sub> | #1 | -0.07    | 0.26  |
|                      | #2 | -0.15    | 0.28  |
|                      | #3 | -0.05    | 0.31  |
| Cu(OTf) <sub>2</sub> | #1 | -0.17    | -0.21 |
|                      | #2 | -0.28    | -0.07 |
|                      | #3 | -0.13    | -0.21 |
| Bi(OTf) <sub>3</sub> | #1 | 0.03     | 0.27  |
|                      | #2 | -0.26    | 0.08  |
|                      | #3 | 0.10     | 0.25  |
| Al(OTf) <sub>3</sub> | #1 | -0.28    | -0.04 |
|                      | #2 | -0.29    | -0.09 |
|                      | #3 | -0.29    | 0.07  |
| In(OTf) <sub>3</sub> | #1 | -0.24    | 0.01  |
|                      | #2 | -0.28    | 0.11  |
|                      | #3 | -0.25    | 0.00  |
| Dy(OTf) <sub>3</sub> | #1 | -0.27    | -0.16 |
|                      | #2 | -0.28    | -0.09 |
|                      | #3 | -0.18    | 0.21  |
| Ce(OTf) <sub>3</sub> | #1 | -0.25    | -0.19 |
|                      | #2 | -0.05    | -0.27 |
|                      | #3 | -0.12    | -0.25 |
| no triflate          | #1 | 0.12     | -0.30 |
|                      | #2 | 0.16     | -0.29 |
|                      | #3 | 0.16     | -0.26 |

**Figure S5. PCA on  $\alpha_1$ , for R is measured at different time interval [40s;49s] | a, PCA scores with 95% confidence ellipsoids. b, Individual variance for the different PC. c, PCA loadings of the different sensing elements' response for PC1 and PC2.**

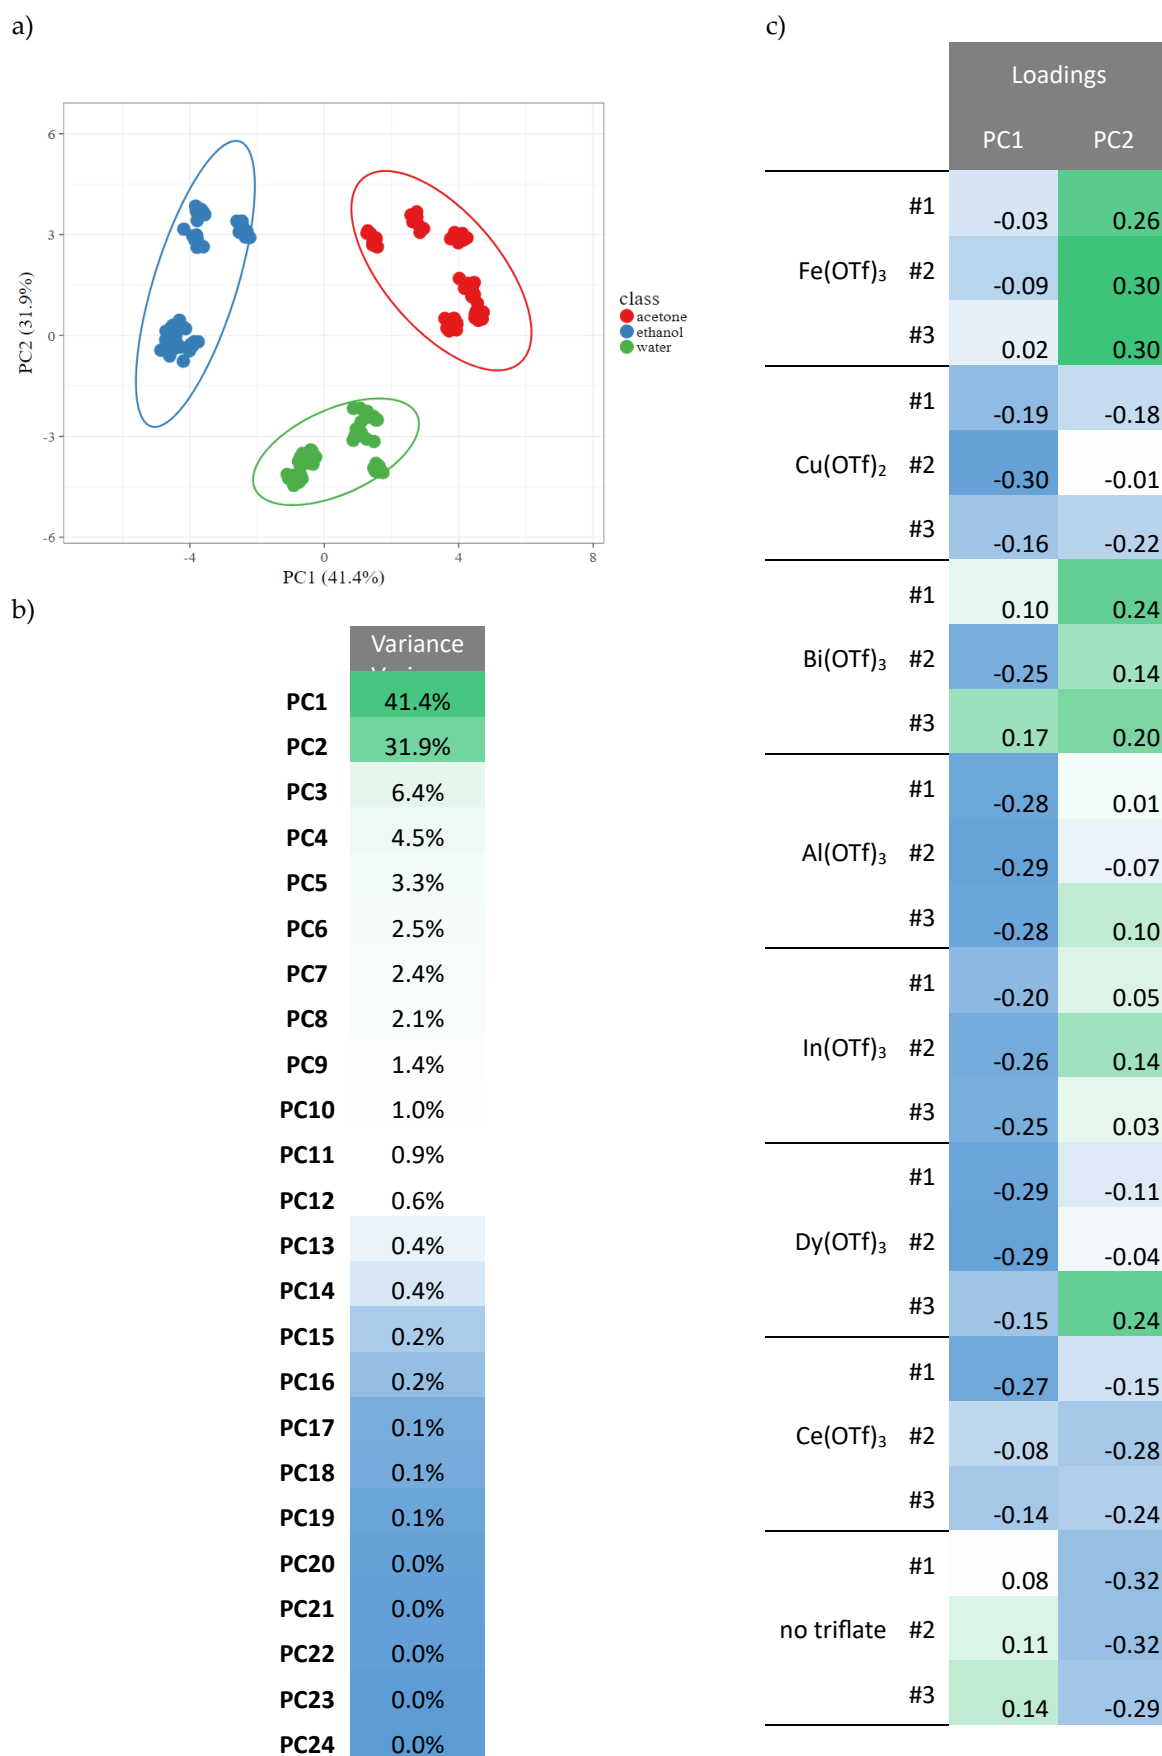

**Figure S6. PCA on  $\alpha_1$ , for R is measured at different time interval [50s;59s] | a, PCA scores with 95% confidence ellipsoids. b, Individual variance for the different PC. c, PCA loadings of the different sensing elements' response for PC1 and PC2.**

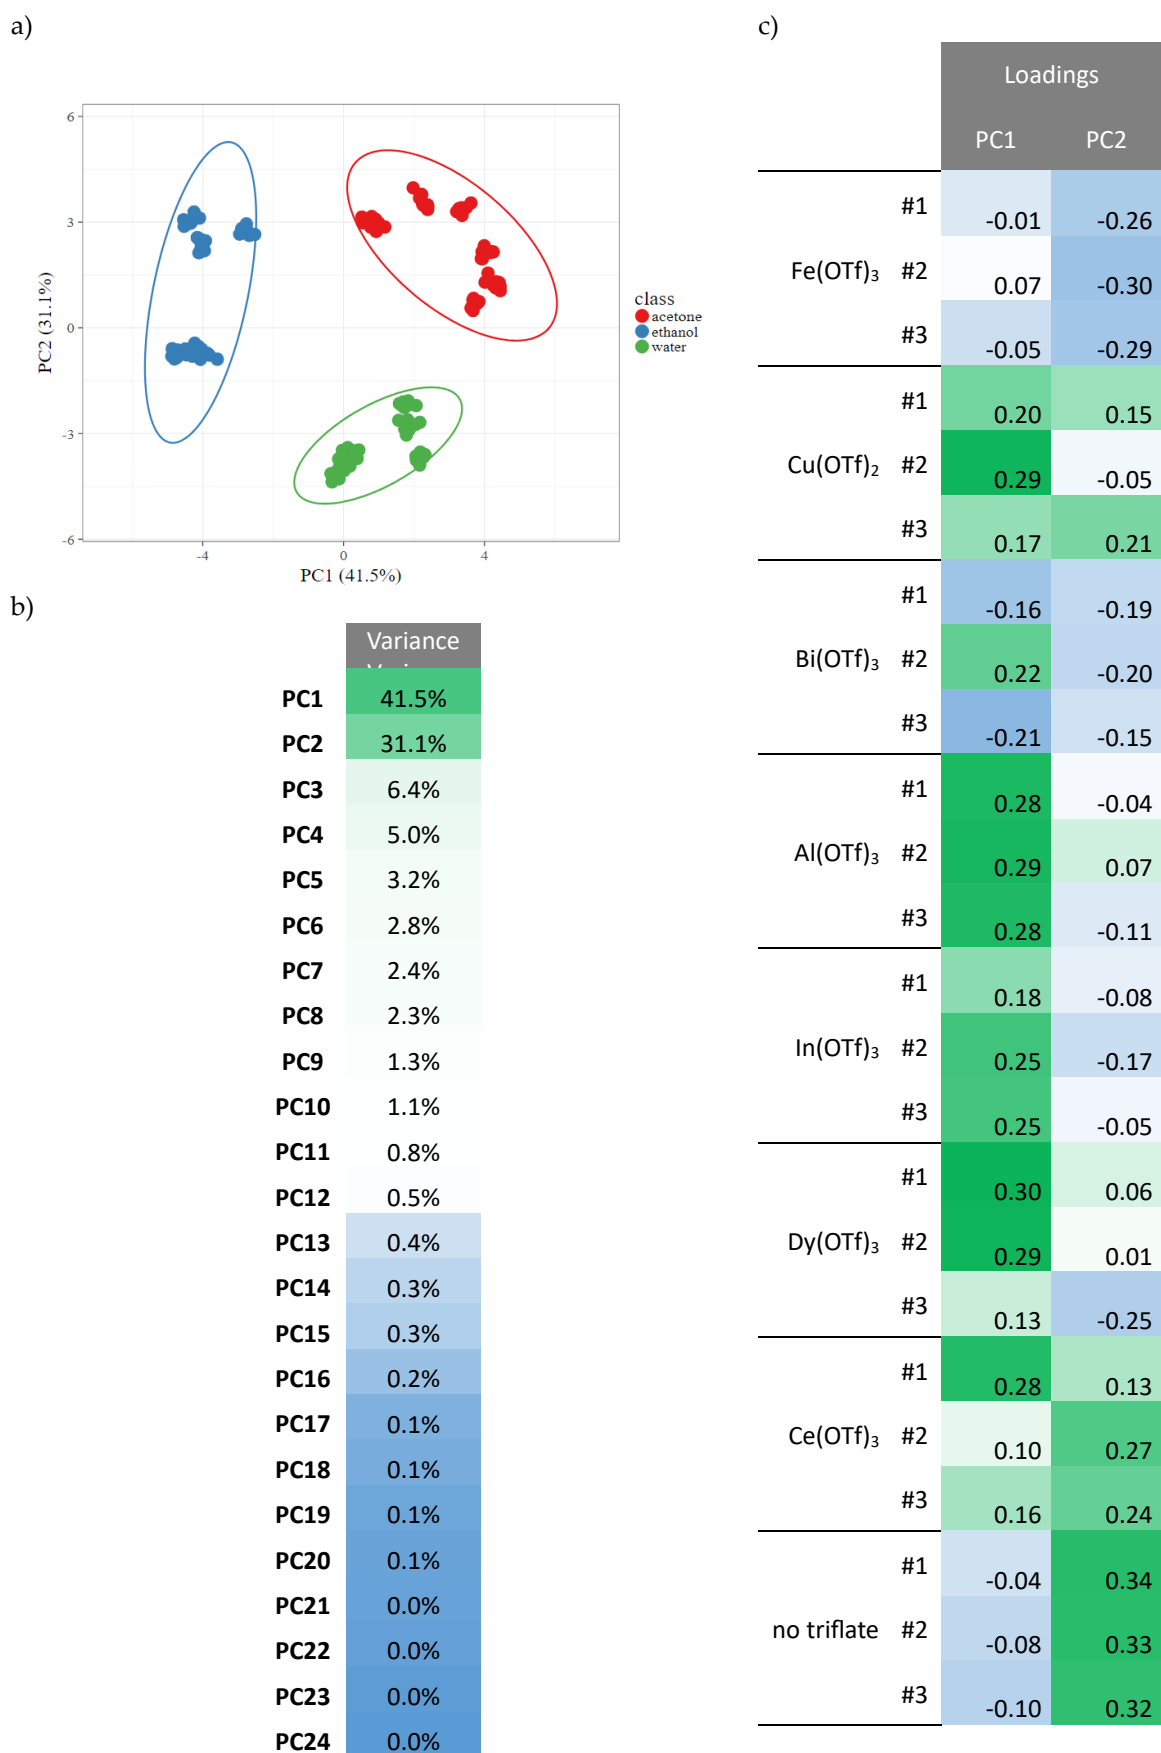

**Figure S7. PCA on  $\alpha_1$ , for R is measured at different time interval [60s;69s] | a, PCA scores with 95% confidence ellipsoids. b, Individual variance for the different PC. c, PCA loadings of the different sensing elements' response for PC1 and PC2.**



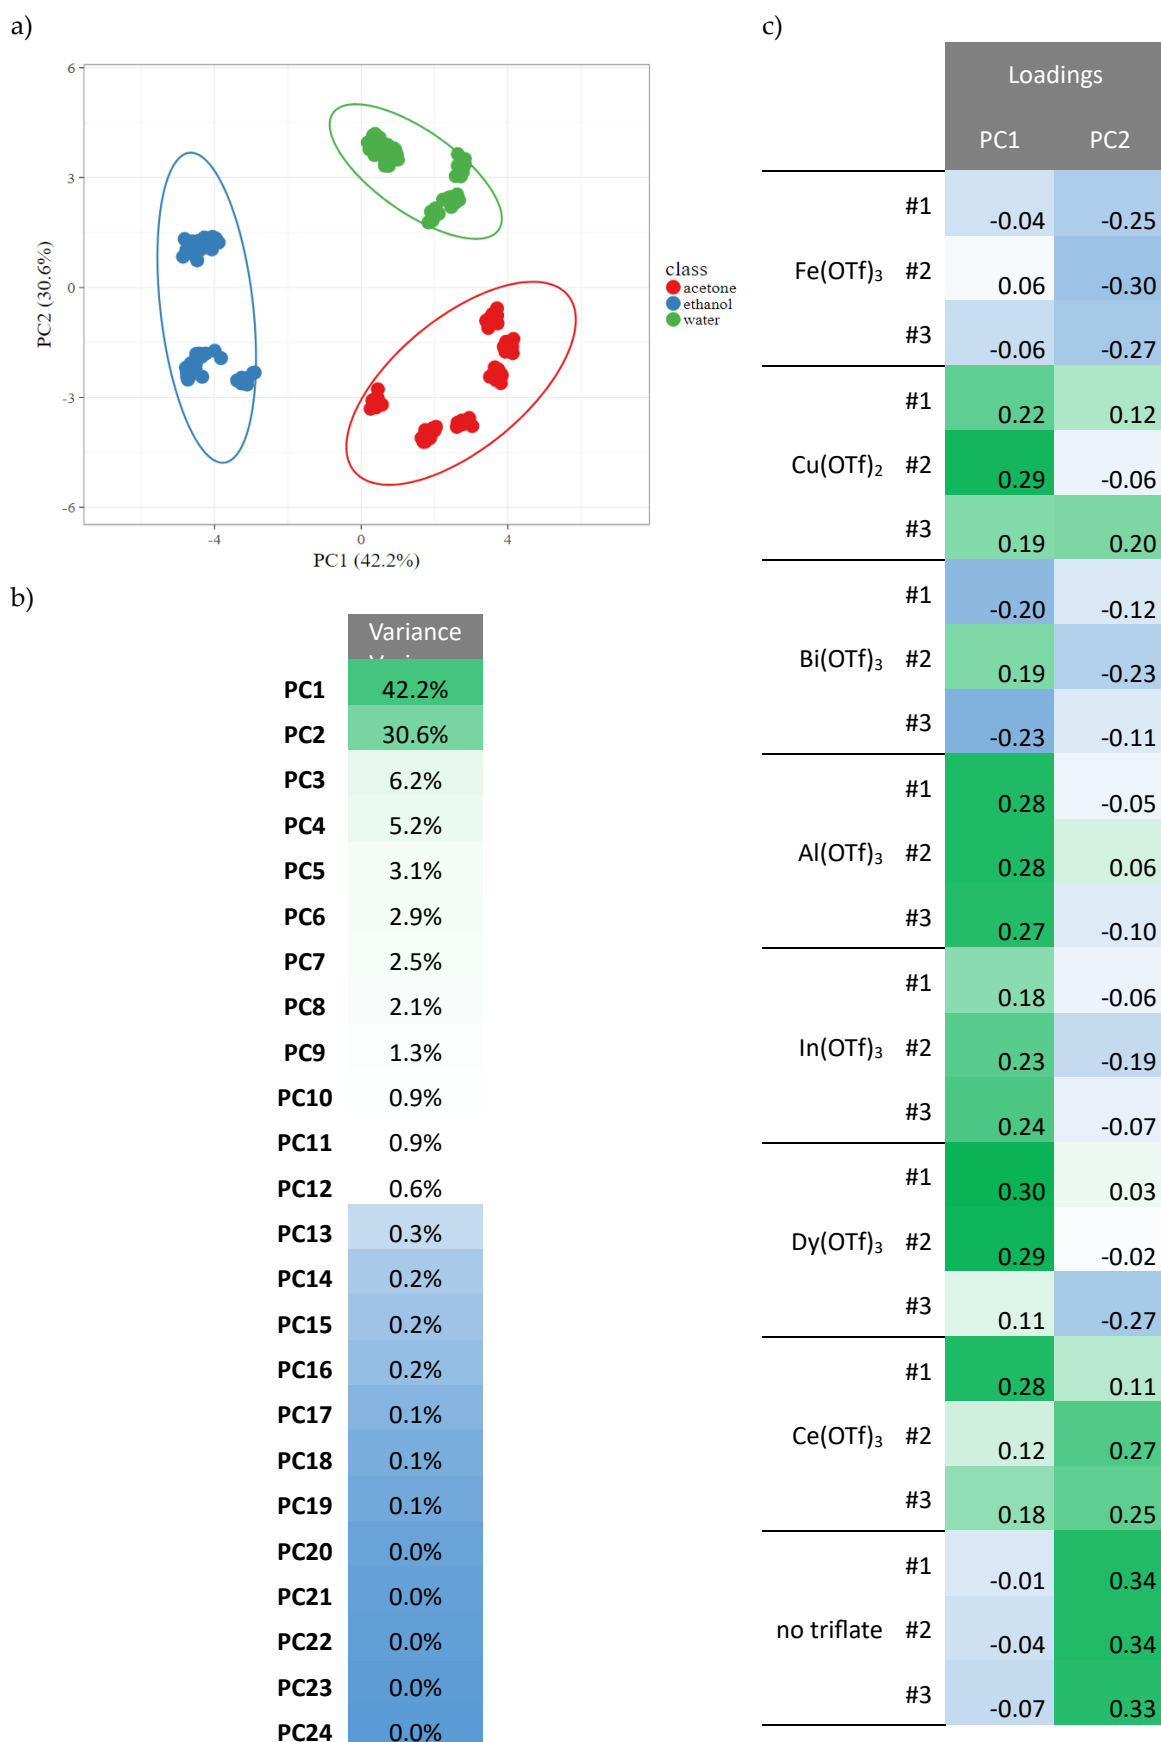

**Figure S8. PCA on  $\alpha_1$ , for R is measured at different time interval [70s;79s] | a, PCA scores with 95% confidence ellipsoids. b, Individual variance for the different PC. c, PCA loadings of the different sensing elements' response for PC1 and PC2.**

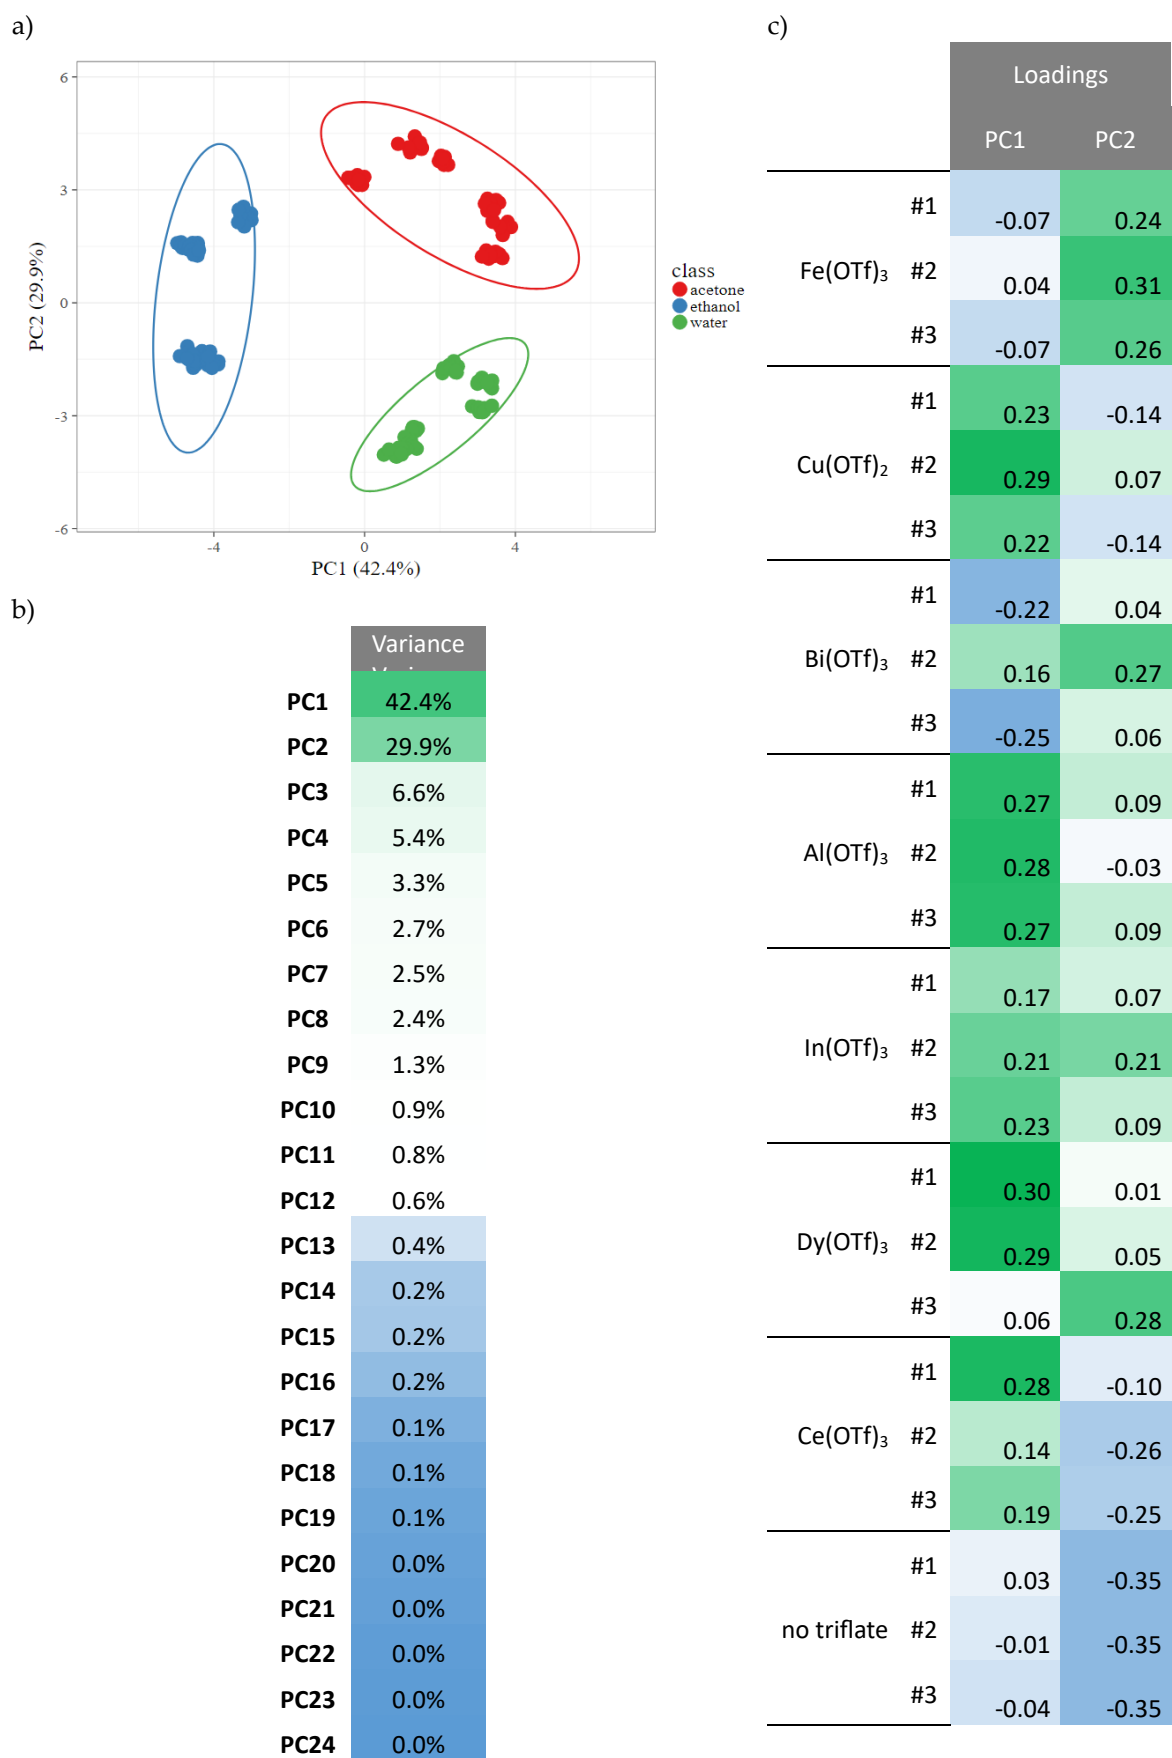

**Figure S9. PCA on  $\alpha_1$ , for R is measured at different time interval [80s;89s] | a, PCA scores with 95% confidence ellipsoids. b, Individual variance for the different PC. c, PCA loadings of the different sensing elements' response for PC1 and PC2.**

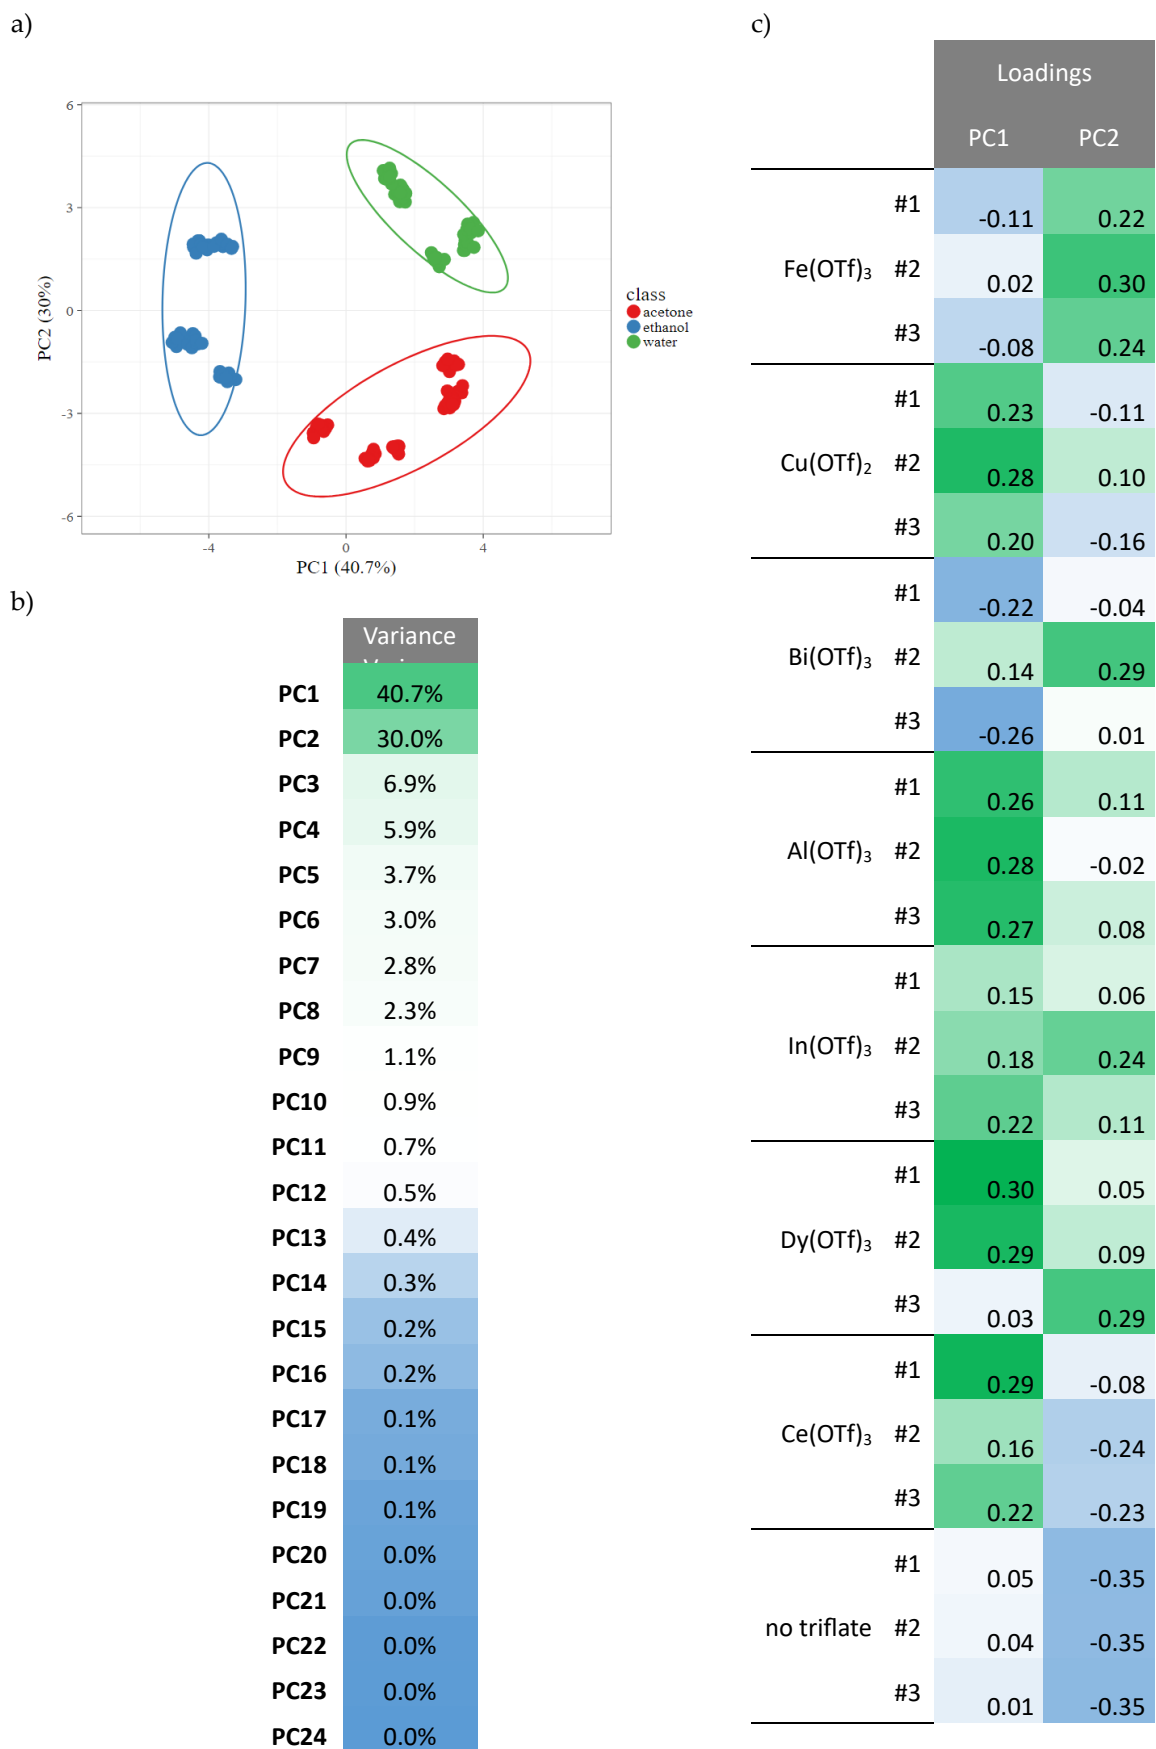

**Figure S10. PCA on  $\alpha_1$ , for R is measured at different time interval [90s;99s] | a, PCA scores with 95% confidence ellipsoids. b, Individual variance for the different PC. c, PCA loadings of the different sensing elements' response for PC1 and PC2.**

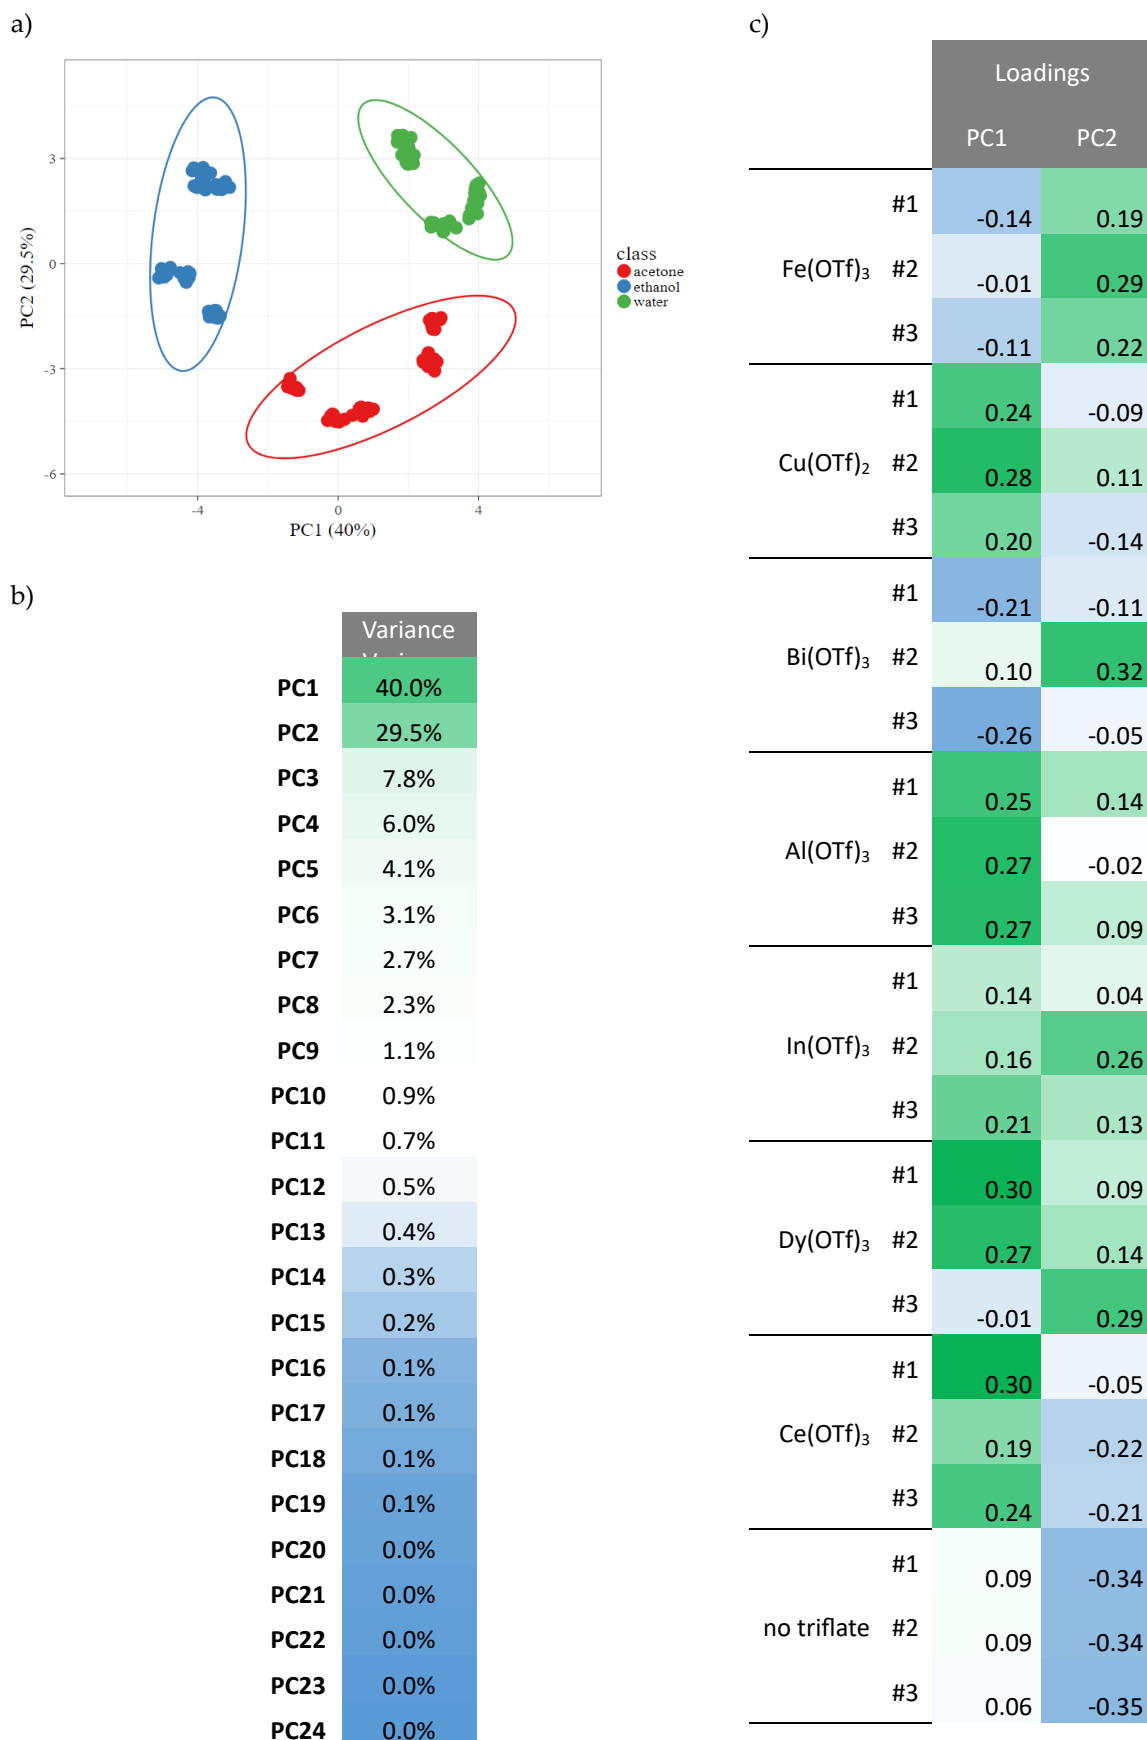

**Figure S11. PCA on  $\alpha_1$ , for R is measured at different time interval [100s;109s] | a, PCA scores with 95% confidence ellipsoids. b, Individual variance for the different PC. c, PCA loadings of the different sensing elements' response for PC1 and PC2.**

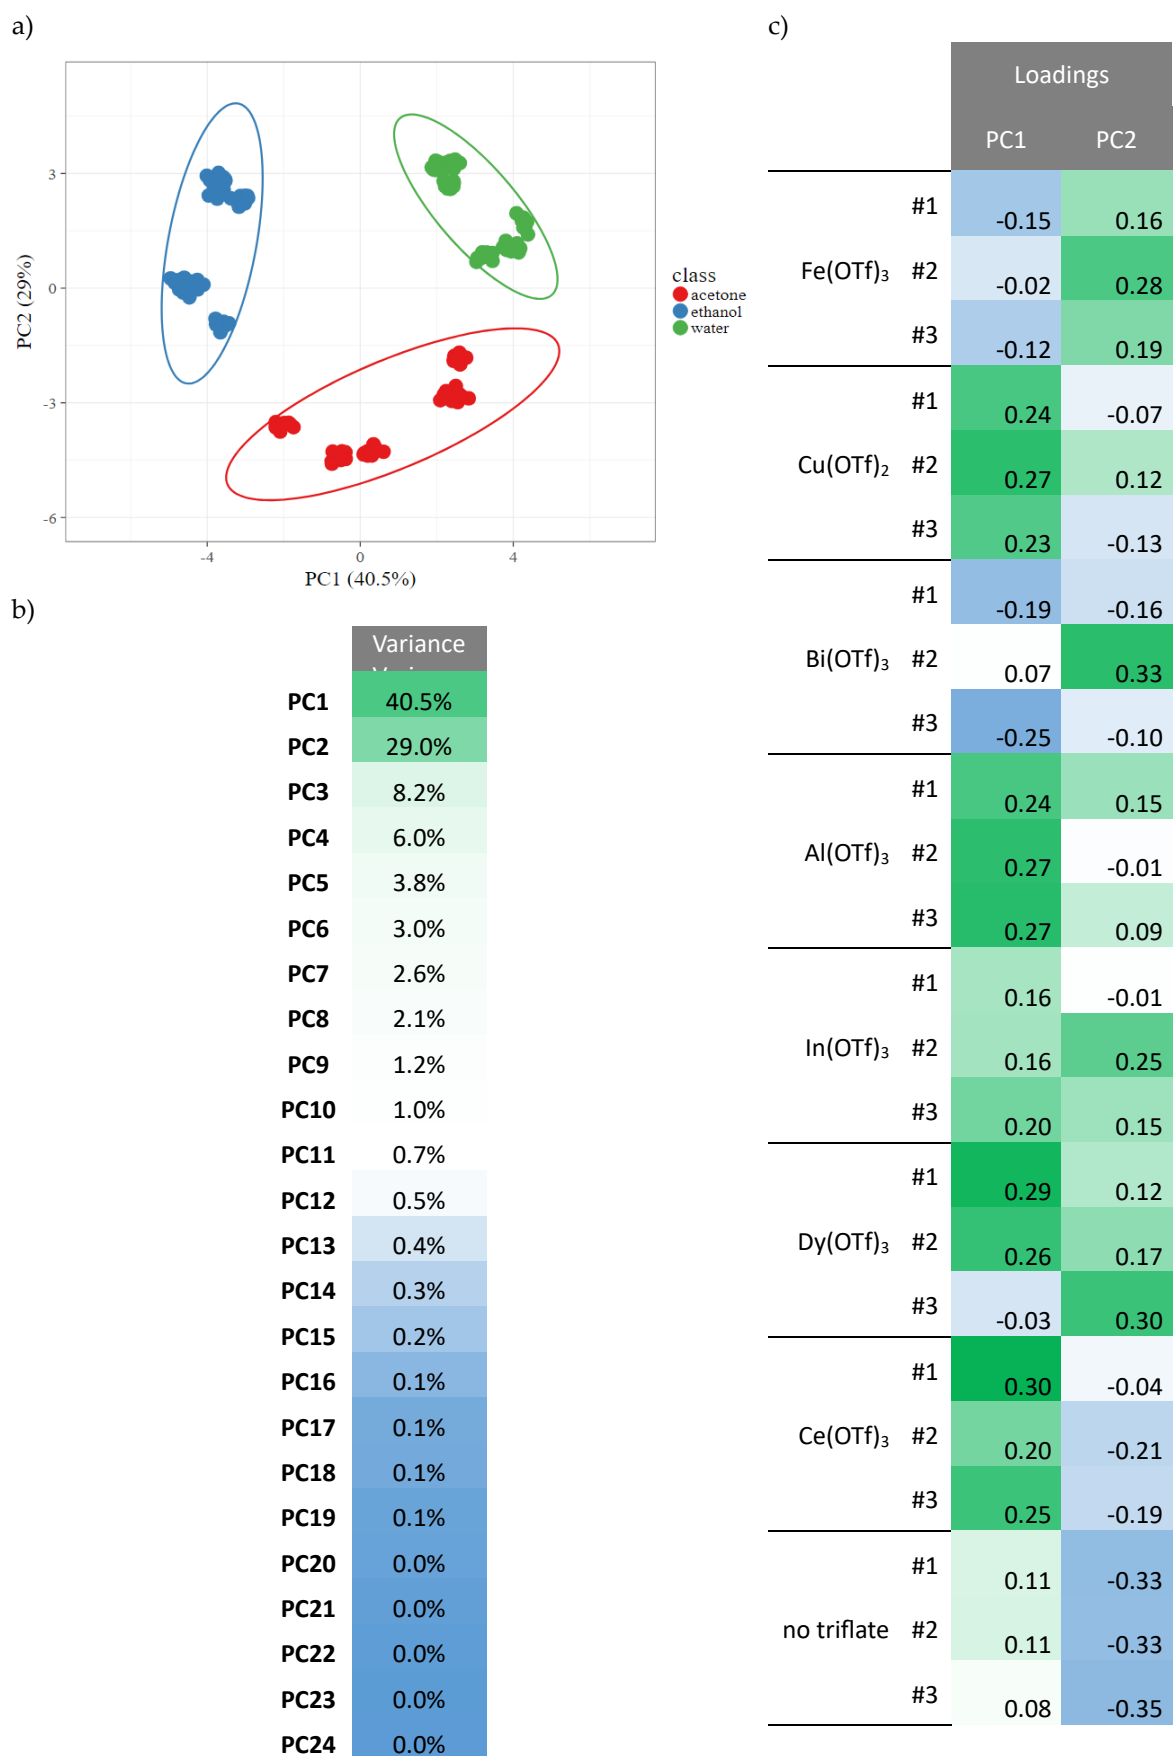

**Figure S12.** PCA on  $\alpha_1$  for R is measured at different time interval [110s;119s] | a, PCA scores with 95% confidence ellipsoids. b, Individual variance for the different PC. c, PCA loadings of the different sensing elements' response for PC1 and PC2.

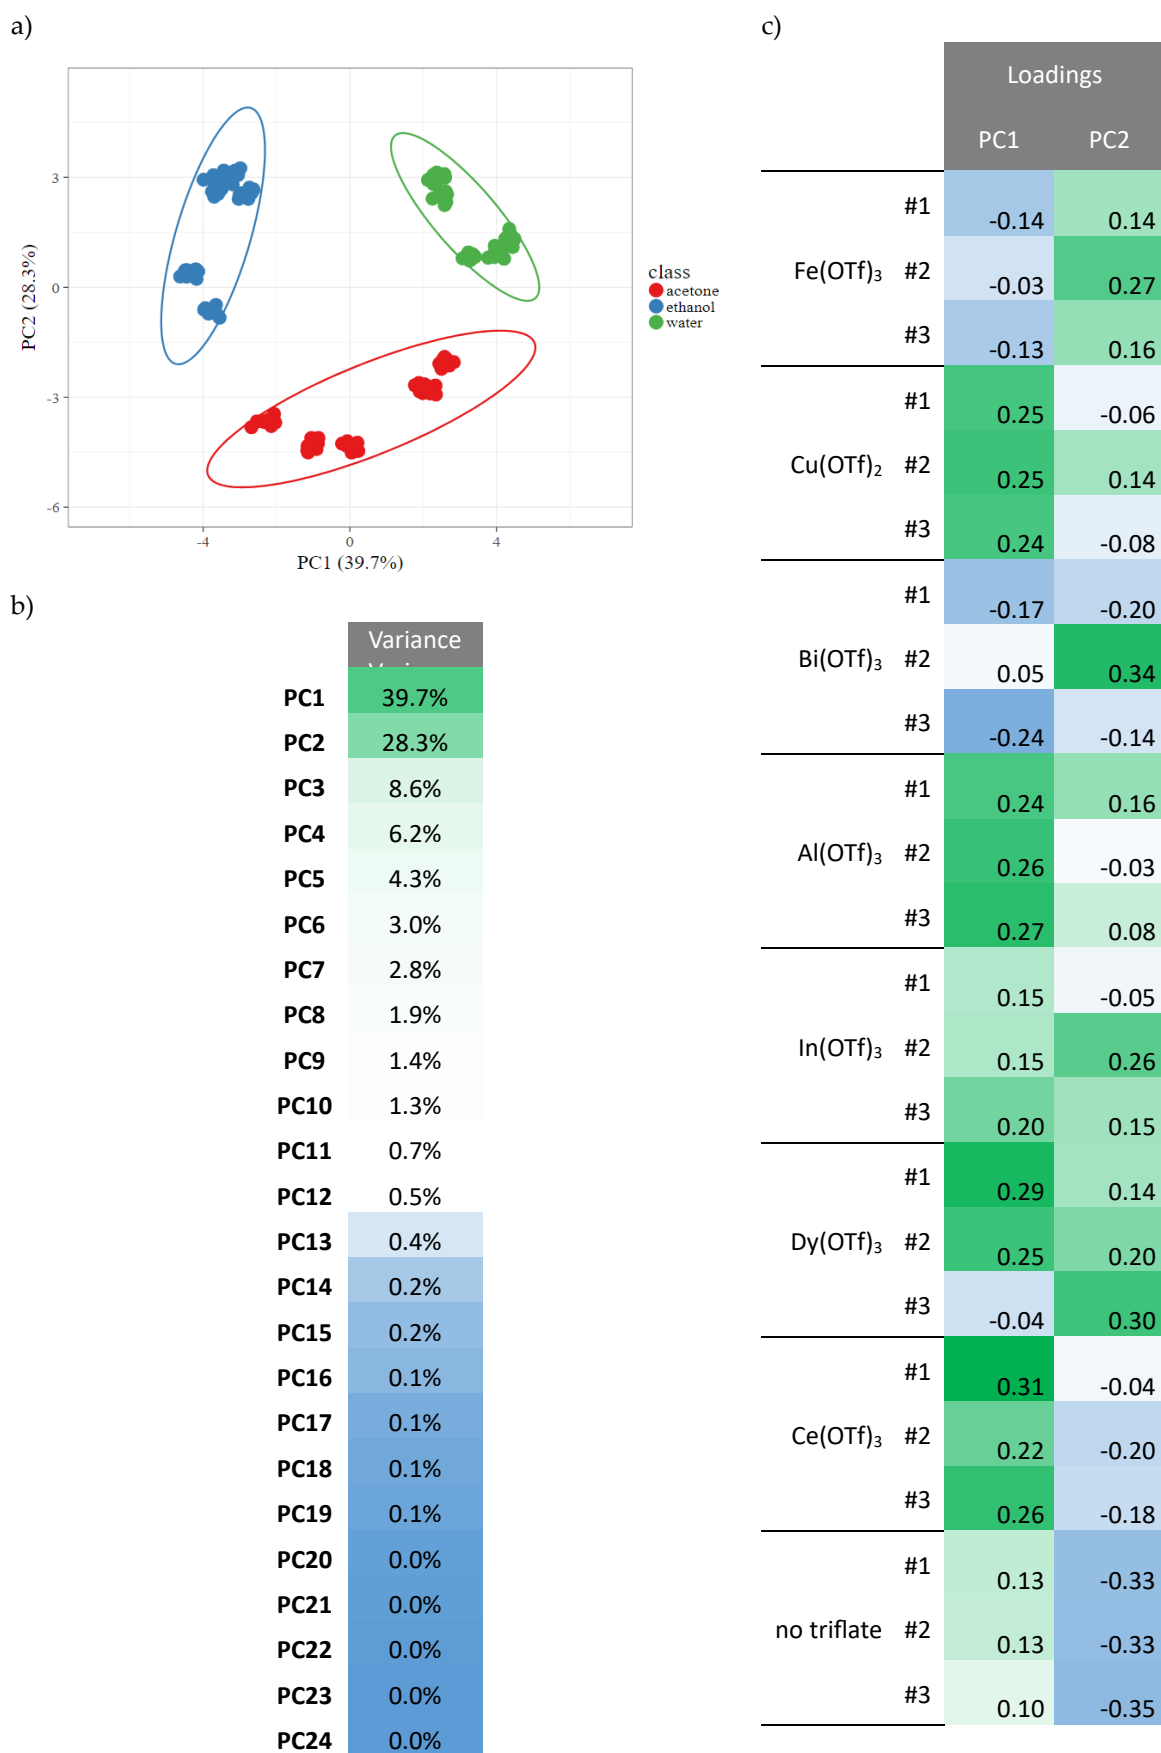

**Figure S13. PCA on  $\alpha_1$ , for R is measured at different time interval [120s;129s] | a, PCA scores with 95% confidence ellipsoids. b, Individual variance for the different PC. c, PCA loadings of the different sensing elements' response for PC1 and PC2.**

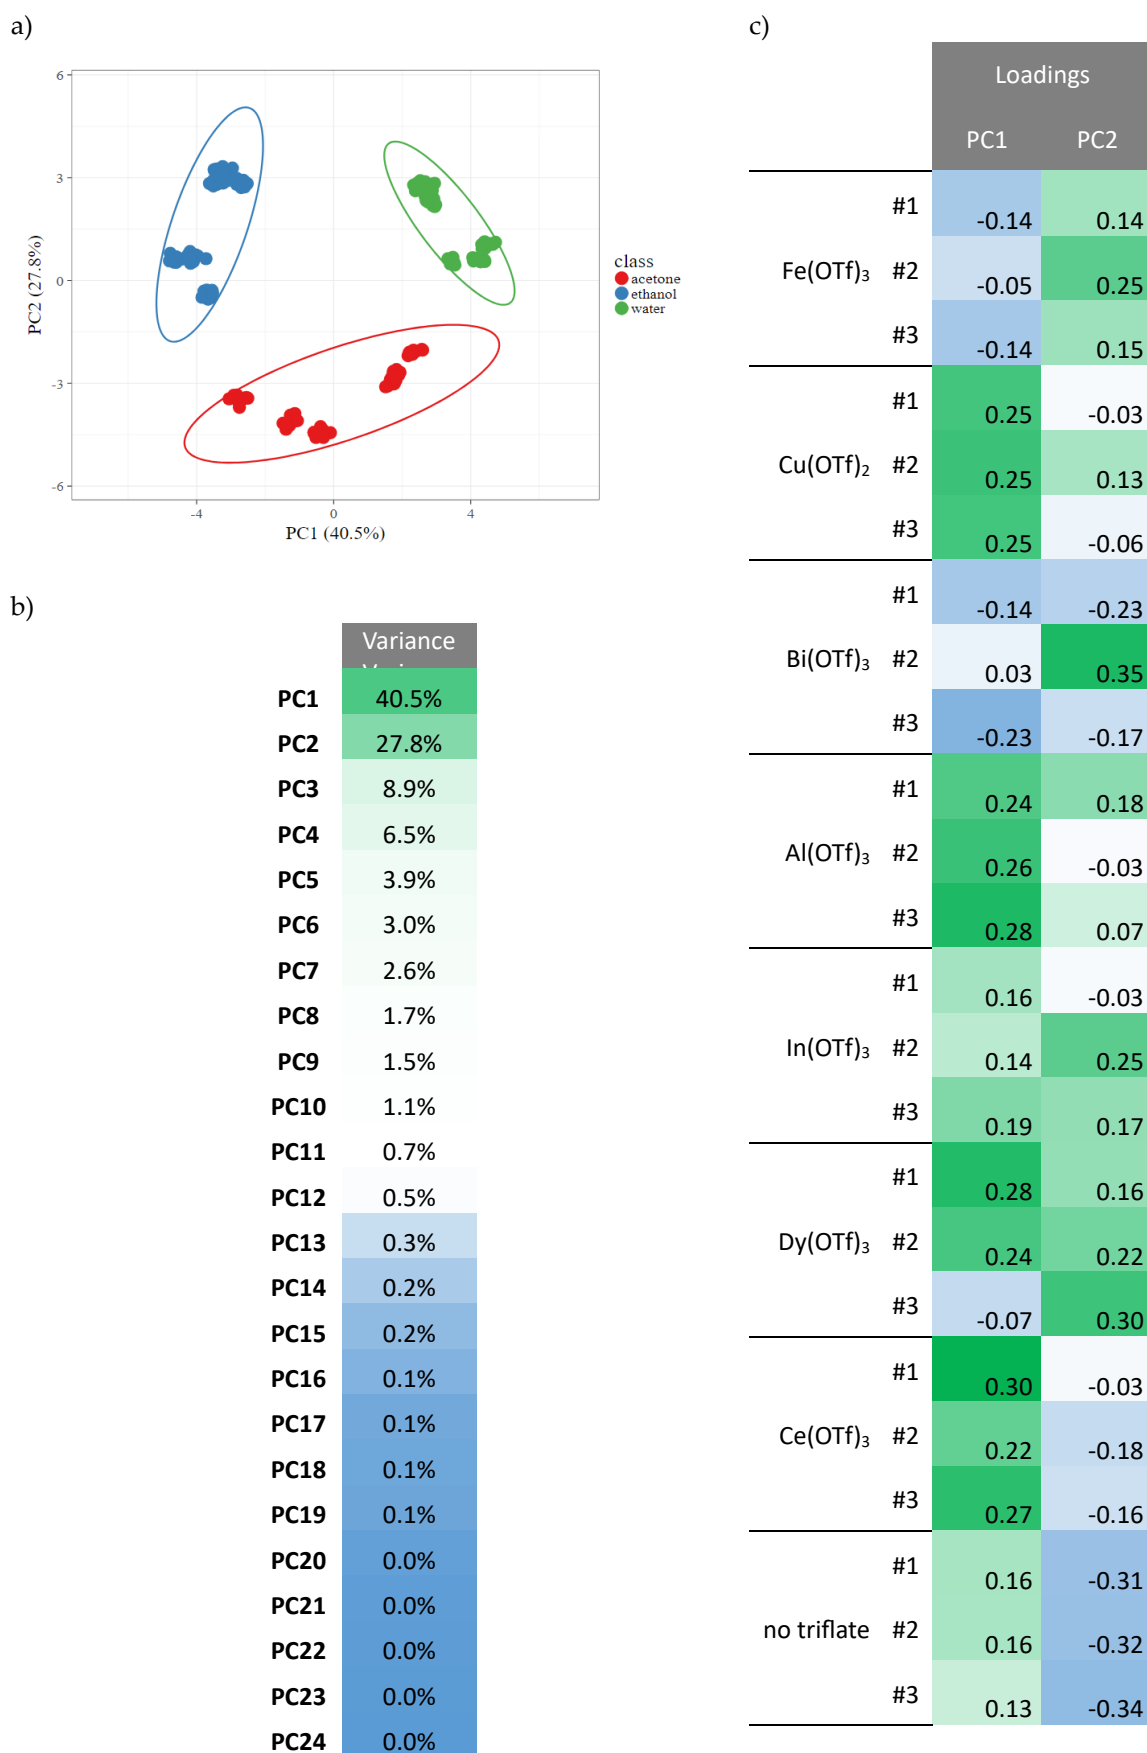

**Figure S14. PCA on  $\alpha_1$ , for R is measured at different time interval [130s;139s] | a, PCA scores with 95% confidence ellipsoids. b, Individual variance for the different PC. c, PCA loadings of the different sensing elements' response for PC1 and PC2.**

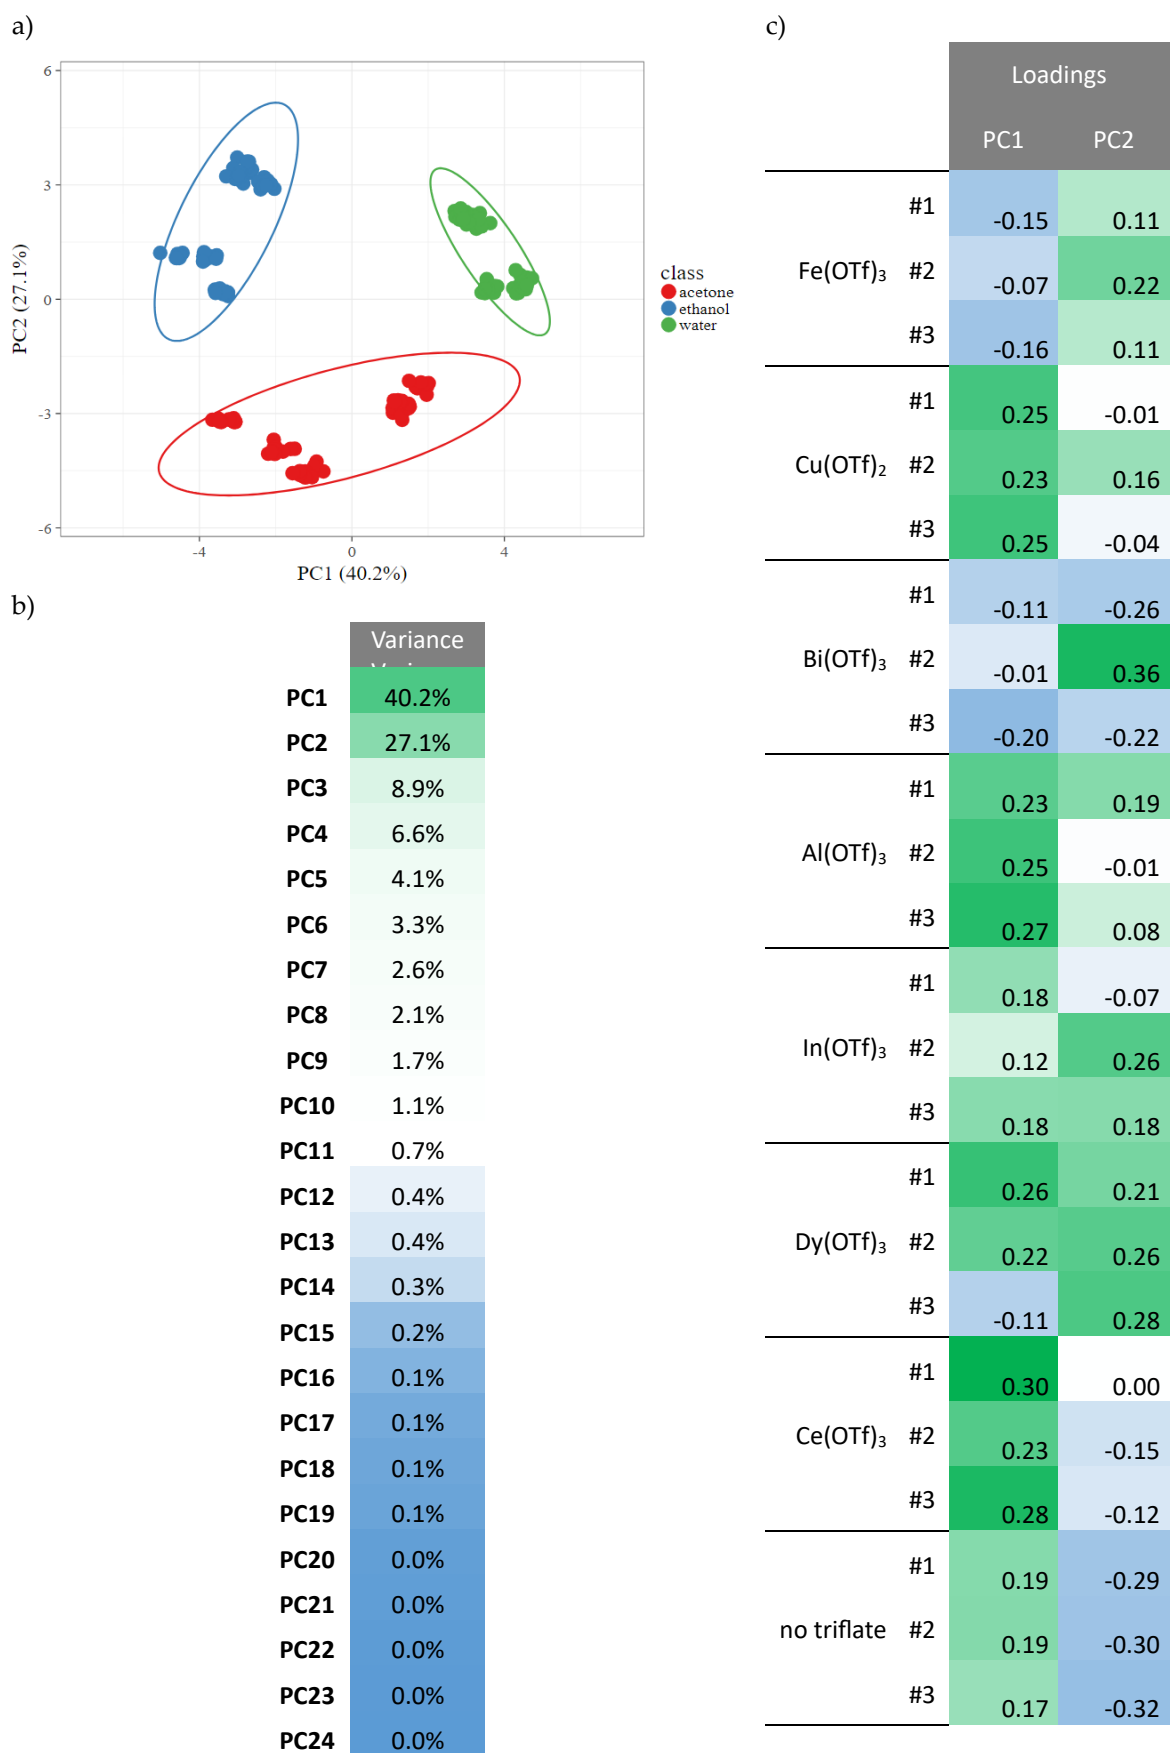

**Figure S15. PCA on  $\alpha_1$ , for R is measured at different time interval [140s;149s] | a, PCA scores with 95% confidence ellipsoids. b, Individual variance for the different PC. c, PCA loadings of the different sensing elements' response for PC1 and PC2.**



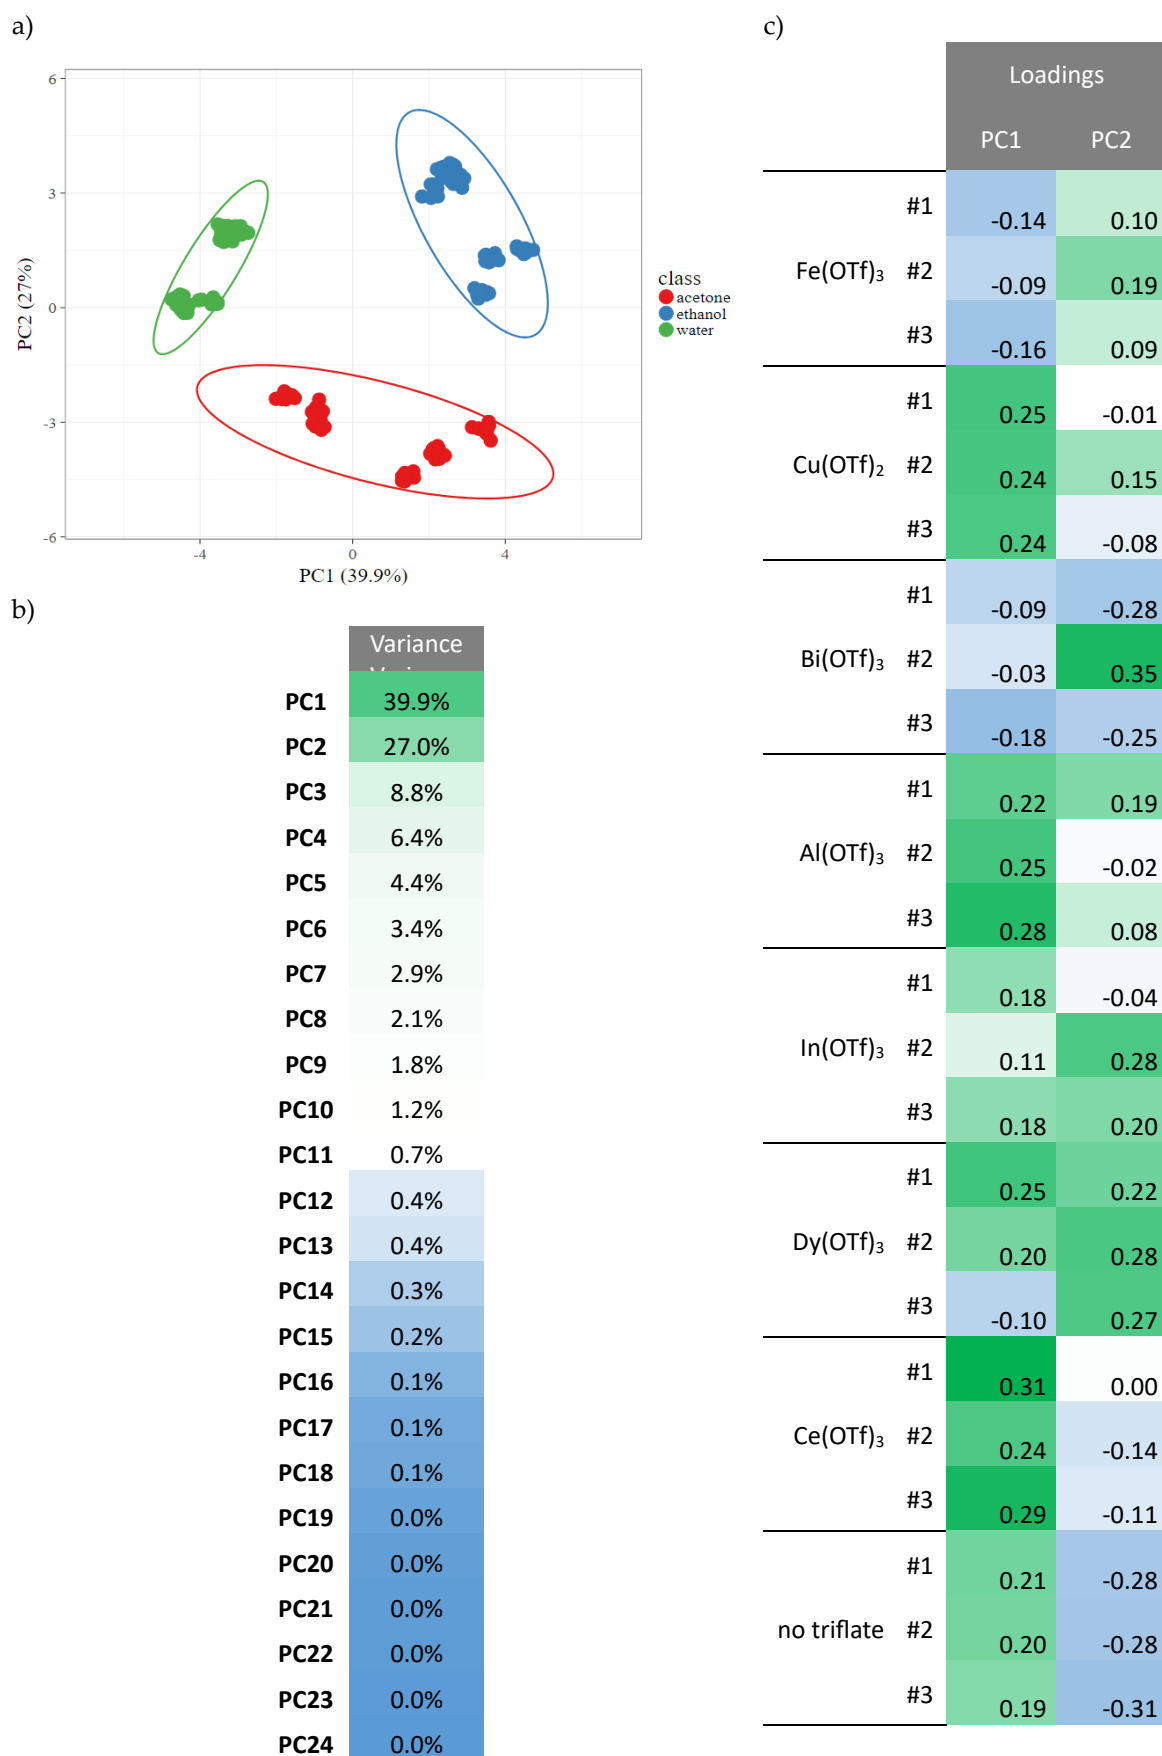

**Figure S16.** PCA on  $\alpha_1$ , for R is measured at different time interval [150s;159s] | **a**, PCA scores with 95% confidence ellipsoids. **b**, Individual variance for the different PC. **c**, PCA loadings of the different sensing elements' response for PC1 and PC2.

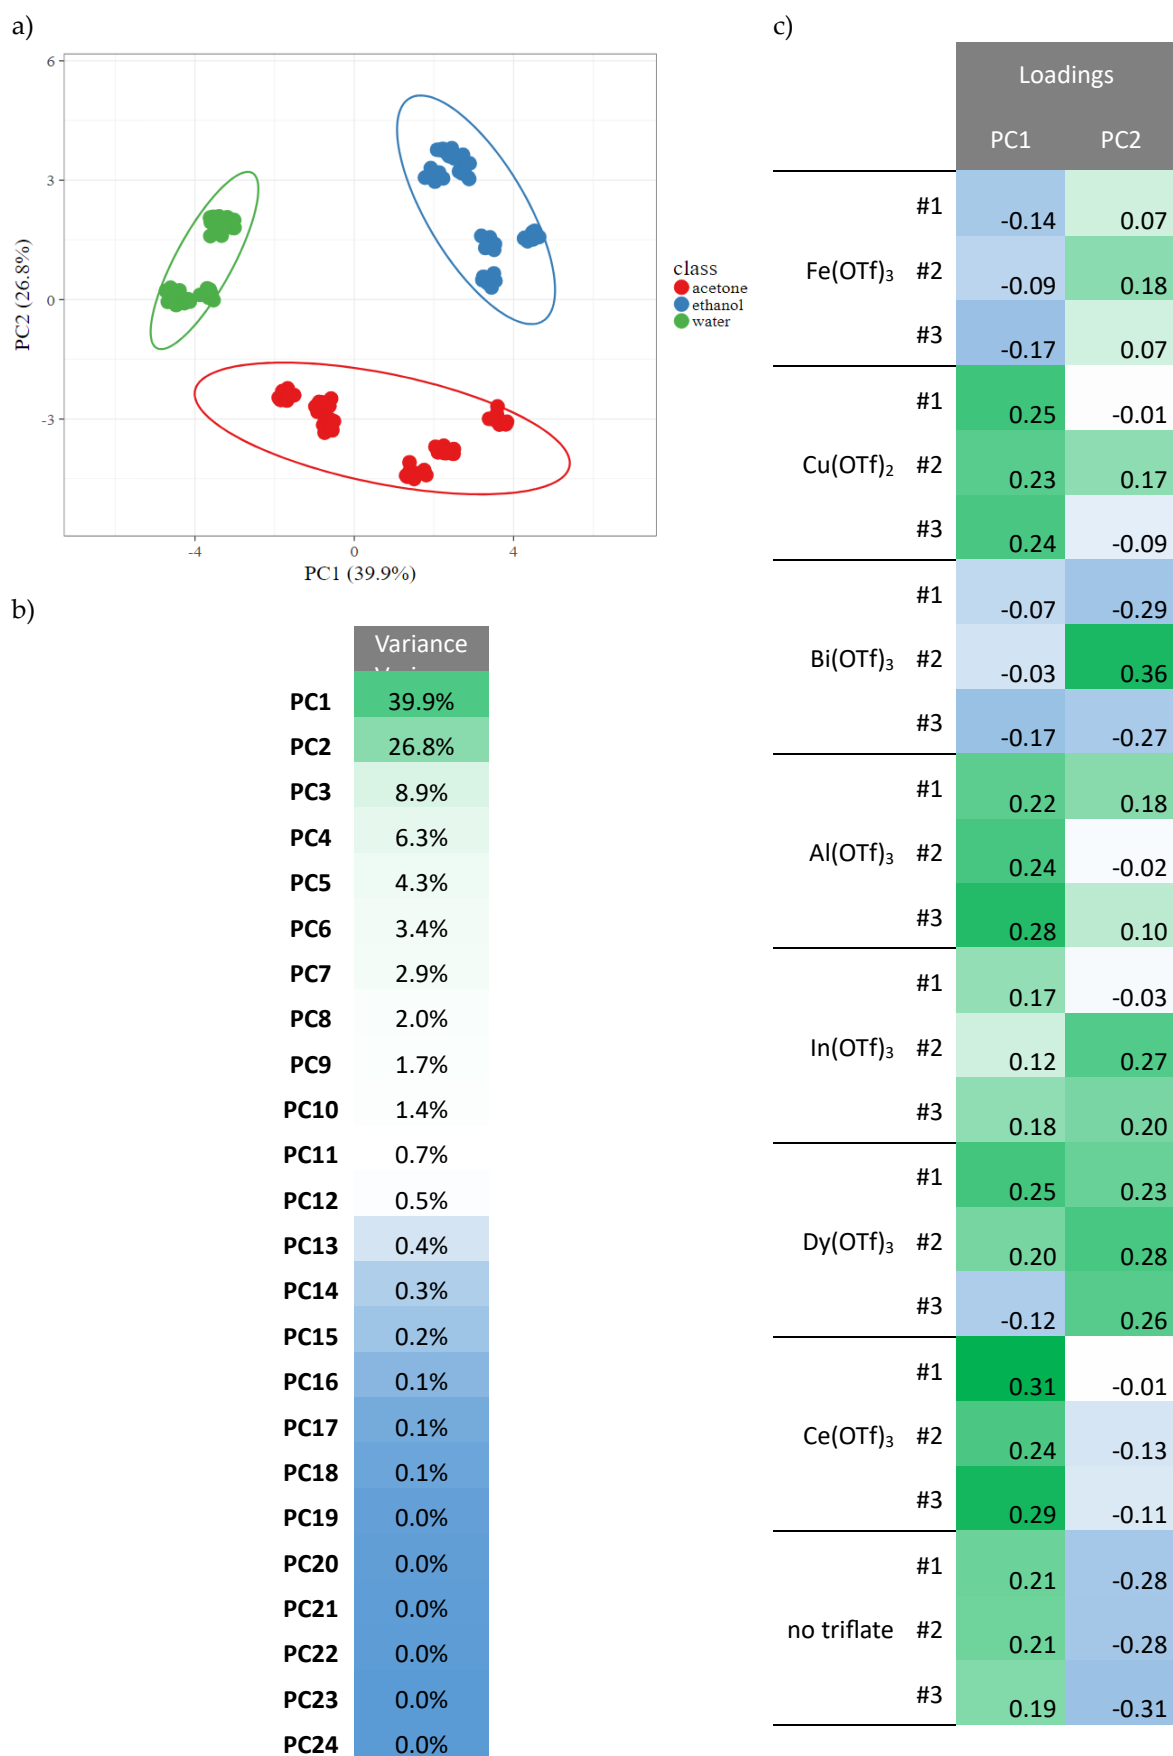

**Figure S17.** PCA on  $\alpha_1$  for R is measured at different time interval [160s;169s] | **a**, PCA scores with 95% confidence ellipsoids. **b**, Individual variance for the different PC. **c**, PCA loadings of the different sensing elements' response for PC1 and PC2.

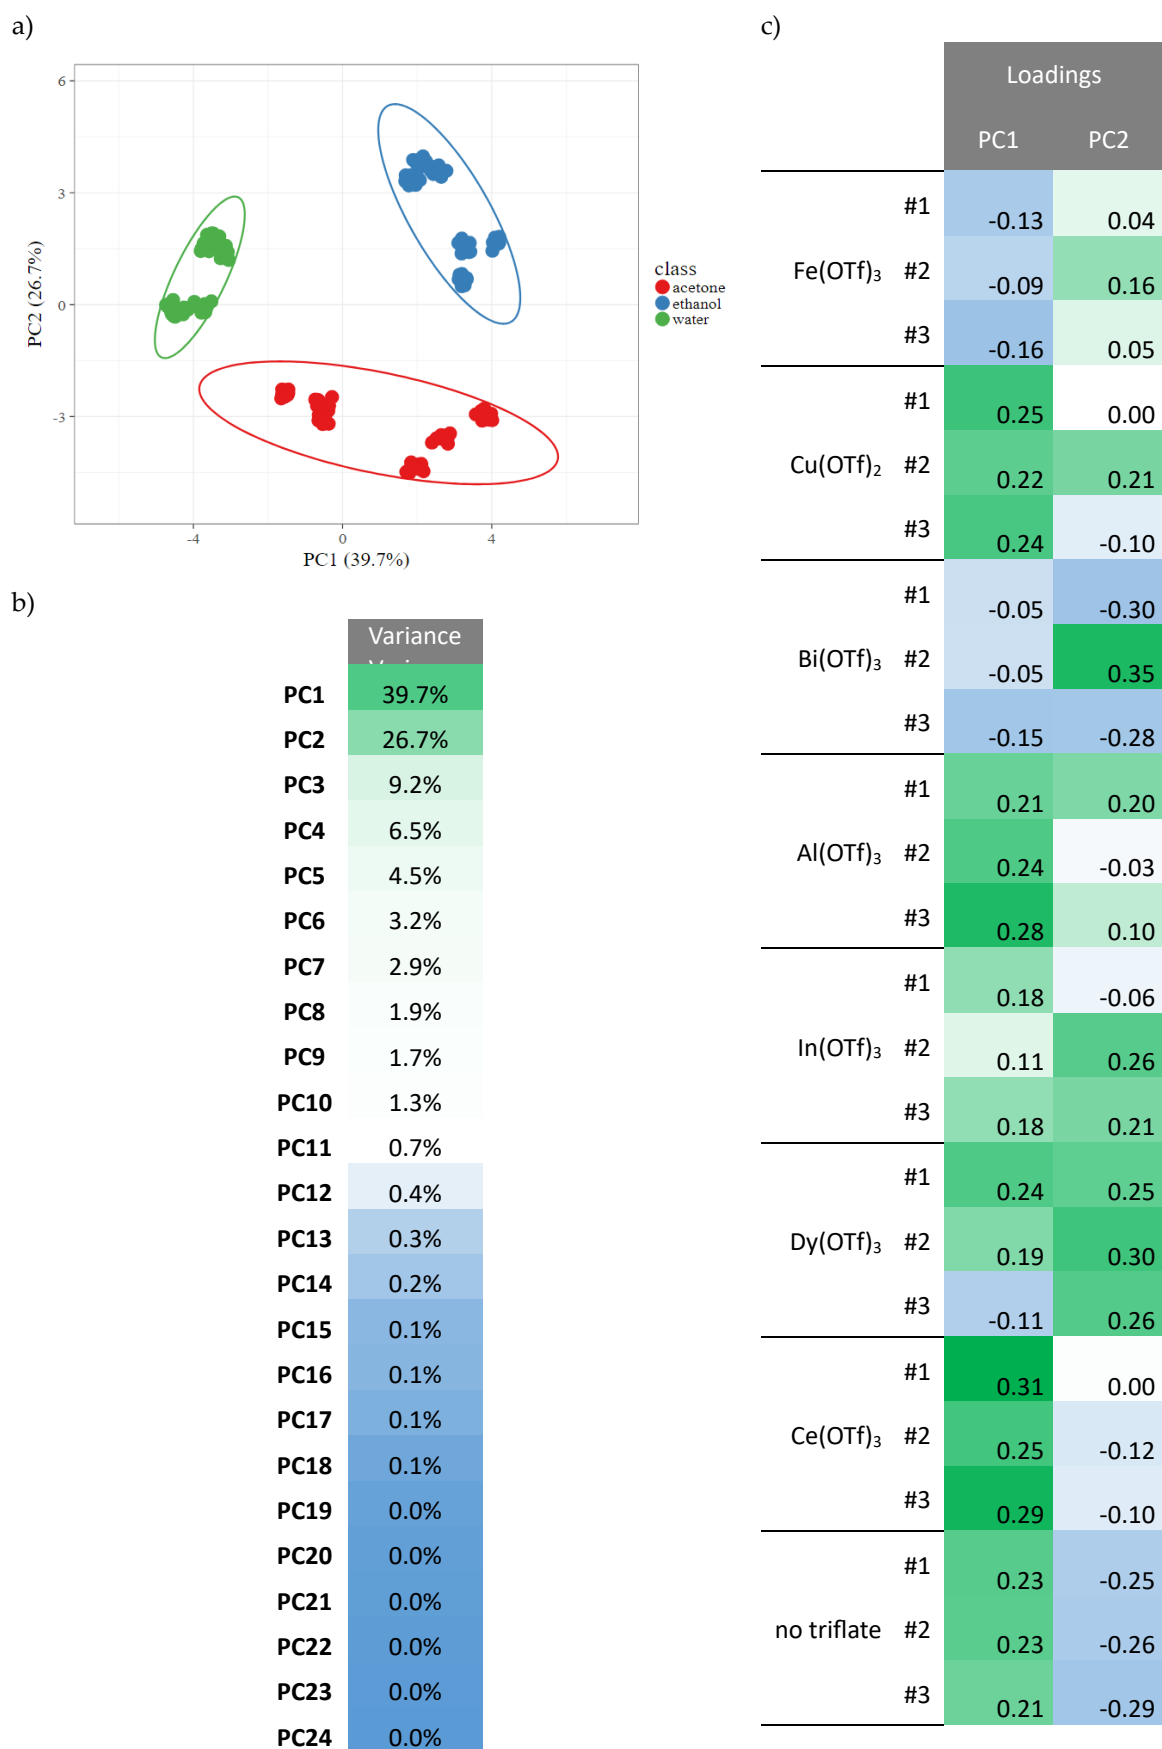

**Figure S18. PCA on  $\alpha_1$ , for R is measured at different time interval [170s;179s] | a, PCA scores with 95% confidence ellipsoids. b, Individual variance for the different PC. c, PCA loadings of the different sensing elements' response for PC1 and PC2.**

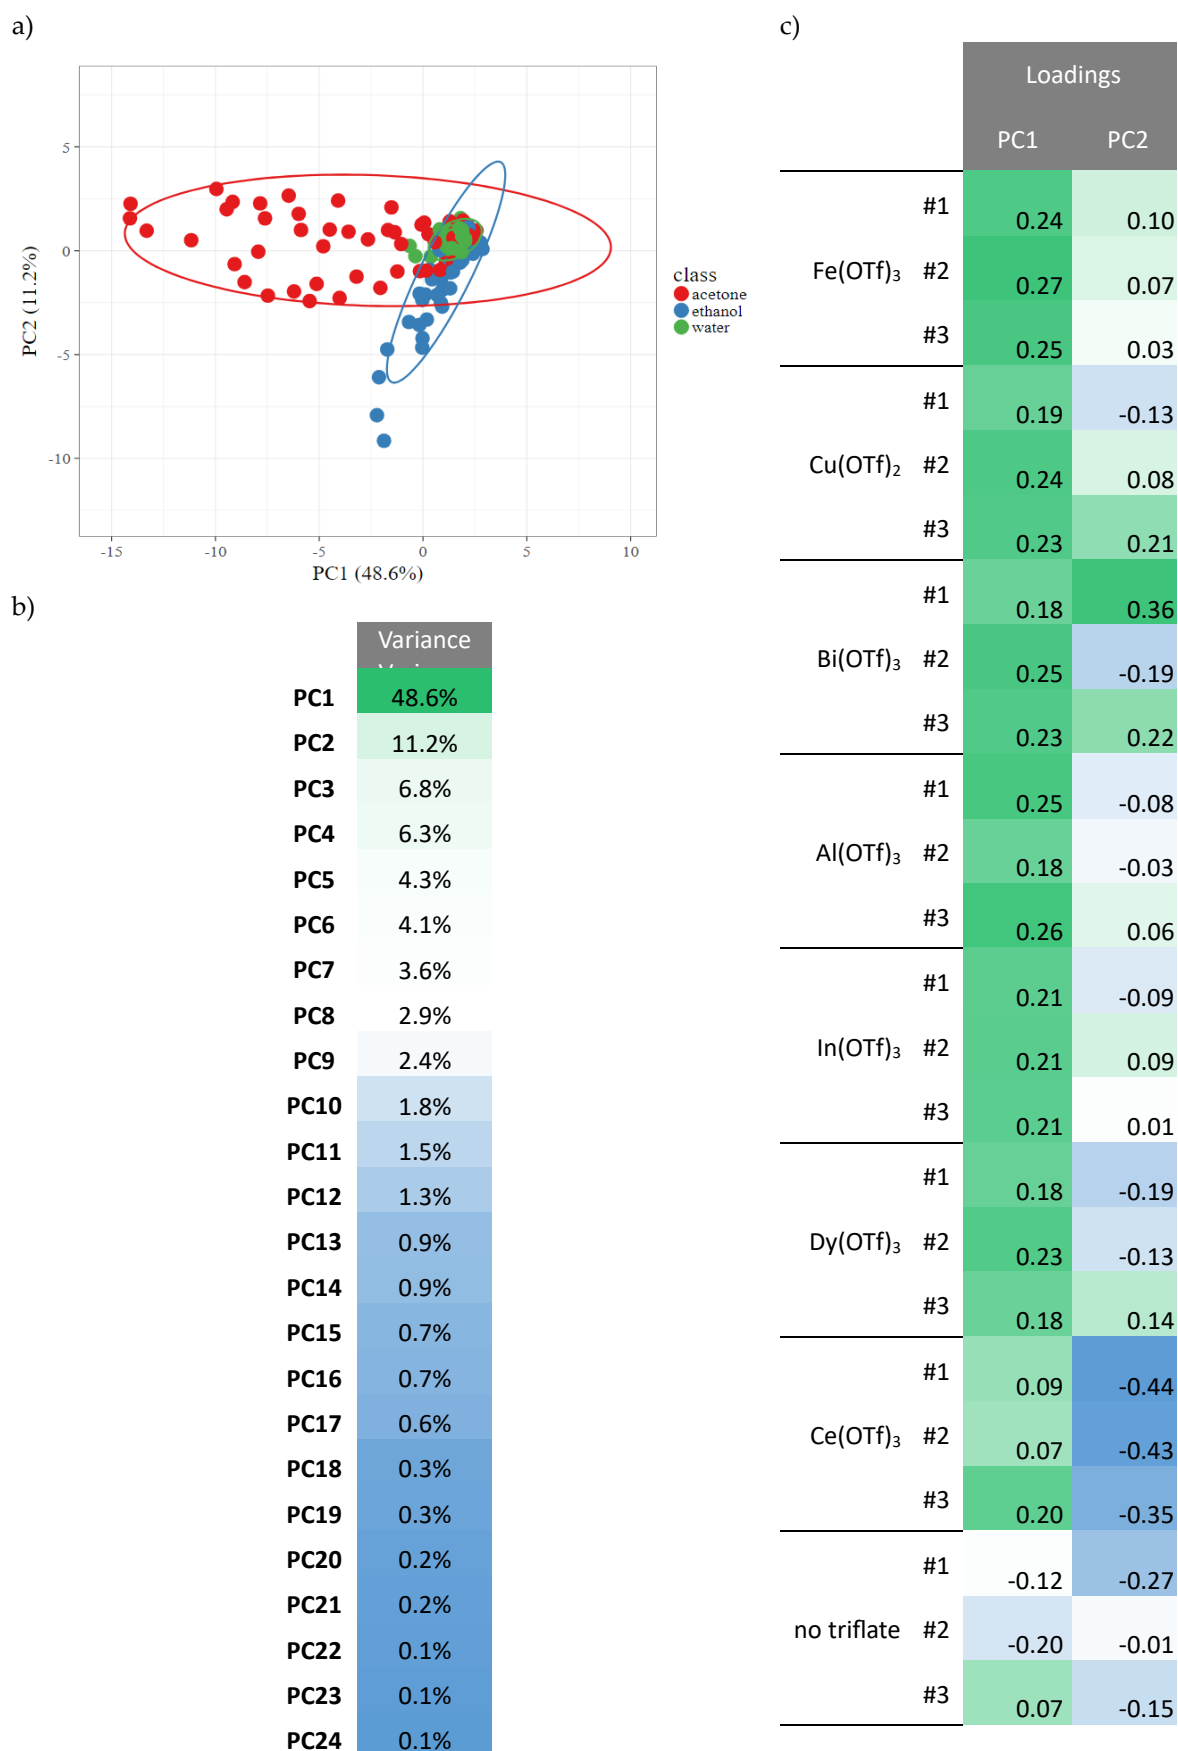

**Figure S19.** PCA on  $\alpha_2$ , for R is measured at different time interval [1s;9s] | **a**, PCA scores with 95% confidence ellipsoids. **b**, Individual variance for the different PC. **c**, PCA loadings of the different sensing elements' response for PC1 and PC2.

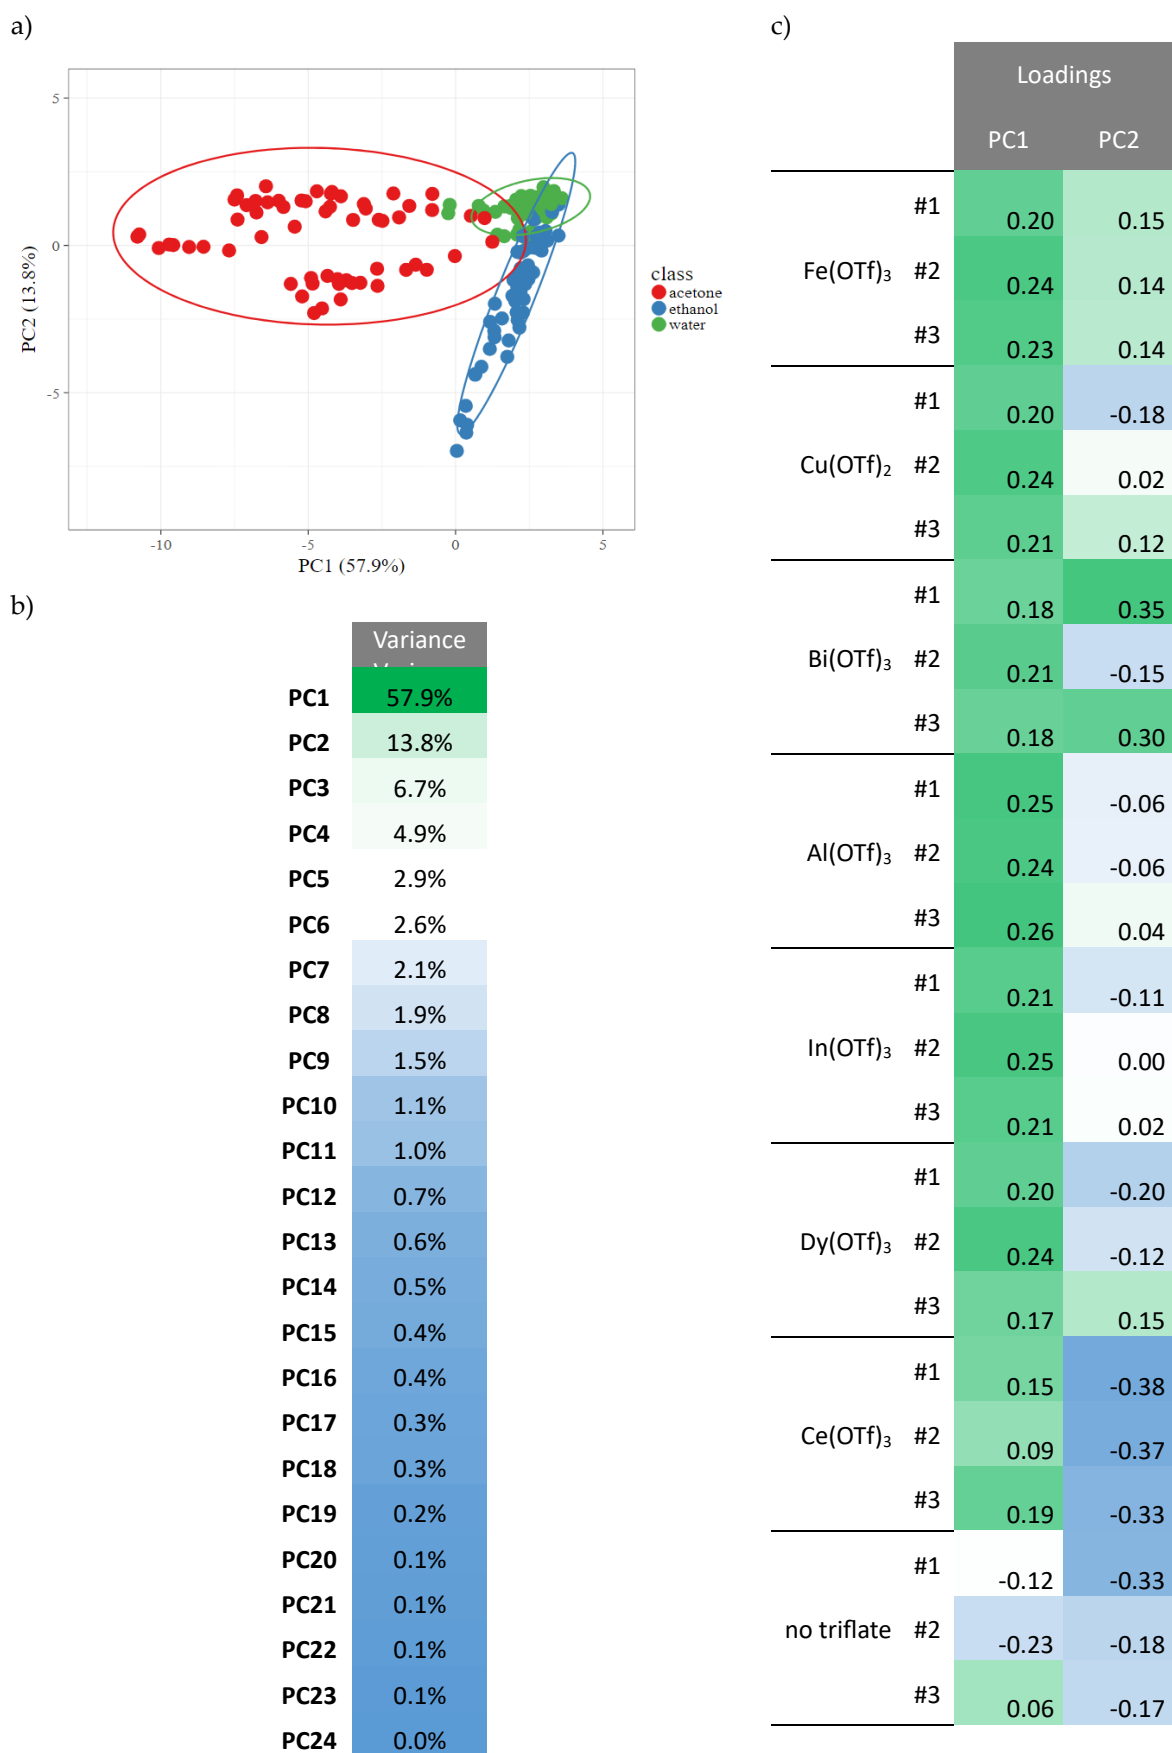

**Figure S20.** PCA on  $\alpha_2$ , for R is measured at different time interval [10s;19s] | **a**, PCA scores with 95% confidence ellipsoids. **b**, Individual variance for the different PC. **c**, PCA loadings of the different sensing elements' response for PC1 and PC2.

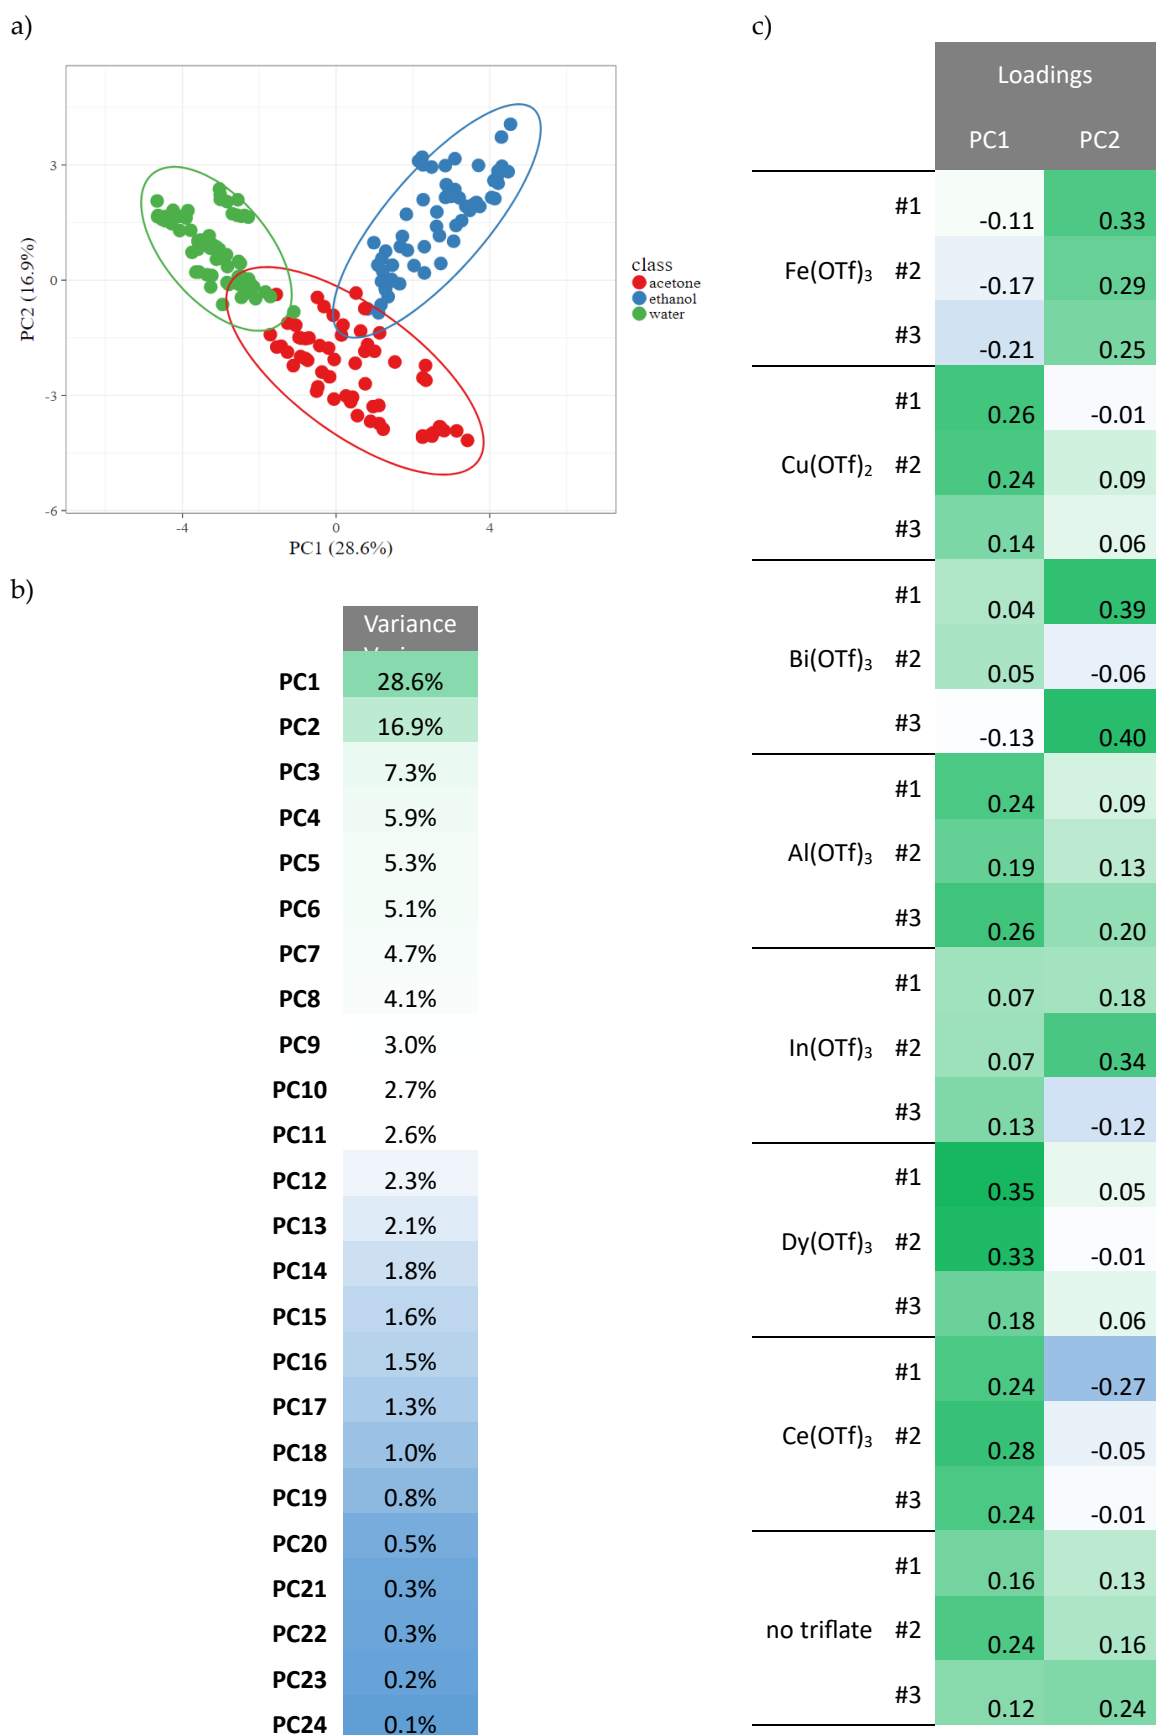

**Figure S21.** PCA on  $\alpha_2$ , for R is measured at different time interval [20s;29s] | **a**, PCA scores with 95% confidence ellipsoids. **b**, Individual variance for the different PC. **c**, PCA loadings of the different sensing elements' response for PC1 and PC2.

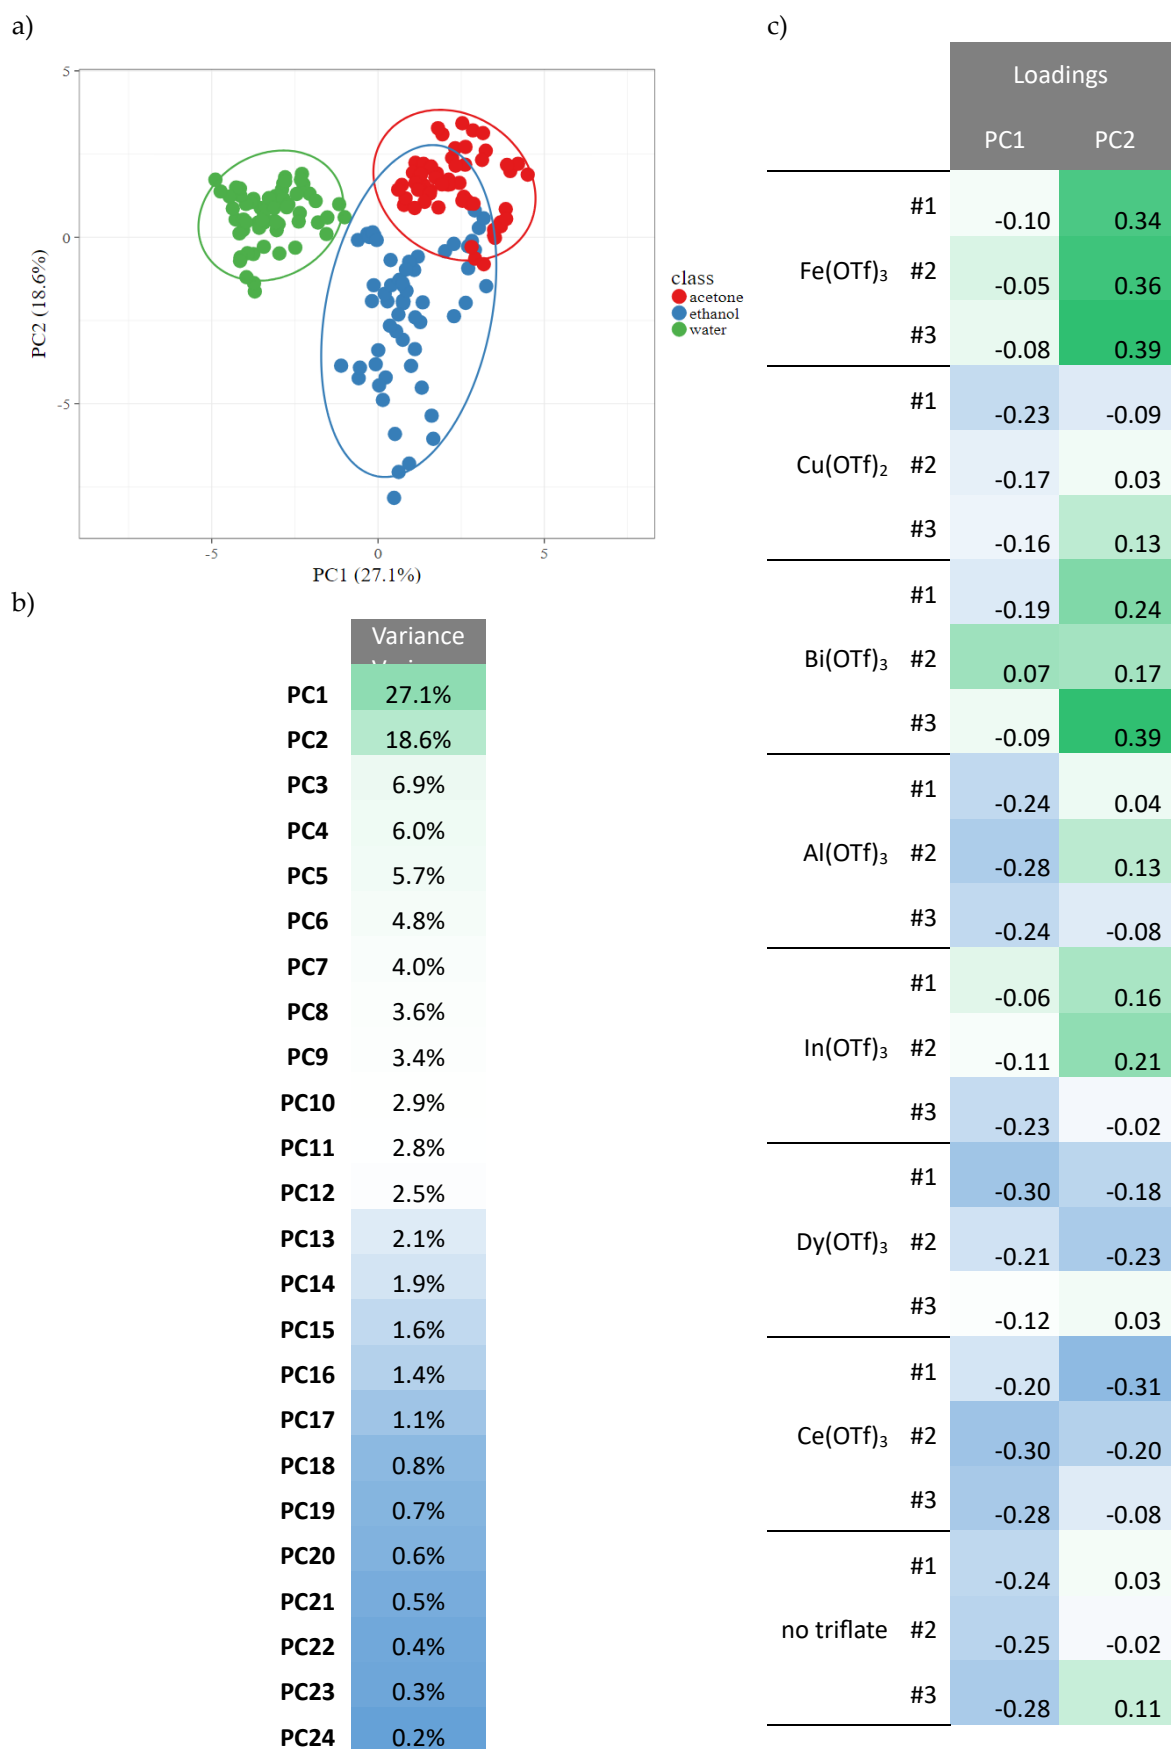

**Figure S22. PCA on  $\alpha_2$ , for R is measured at different time interval [30s;39s] | a, PCA scores with 95% confidence ellipsoids. b, Individual variance for the different PC. c, PCA loadings of the different sensing elements' response for PC1 and PC2.**

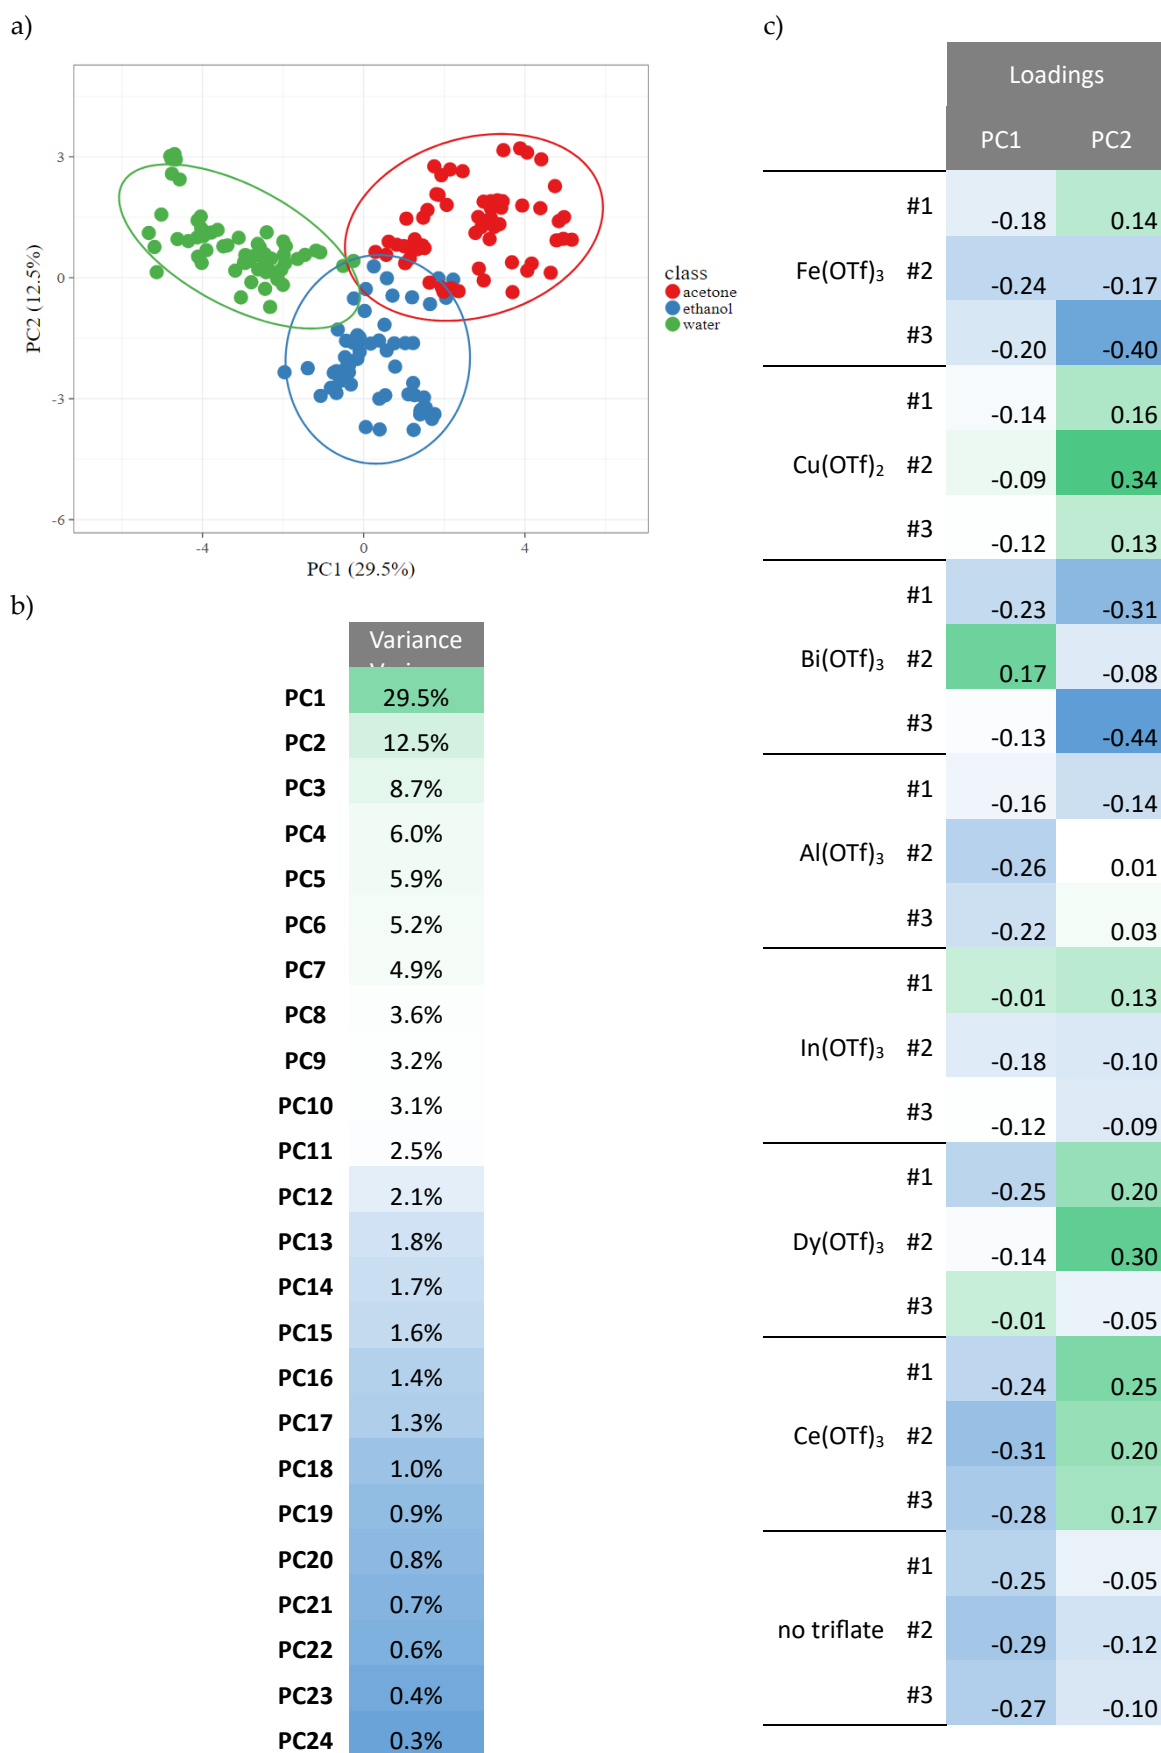

**Figure S23.** PCA on  $\alpha_2$ , for R is measured at different time interval [40s;49s] | **a**, PCA scores with 95% confidence ellipsoids. **b**, Individual variance for the different PC. **c**, PCA loadings of the different sensing elements' response for PC1 and PC2.



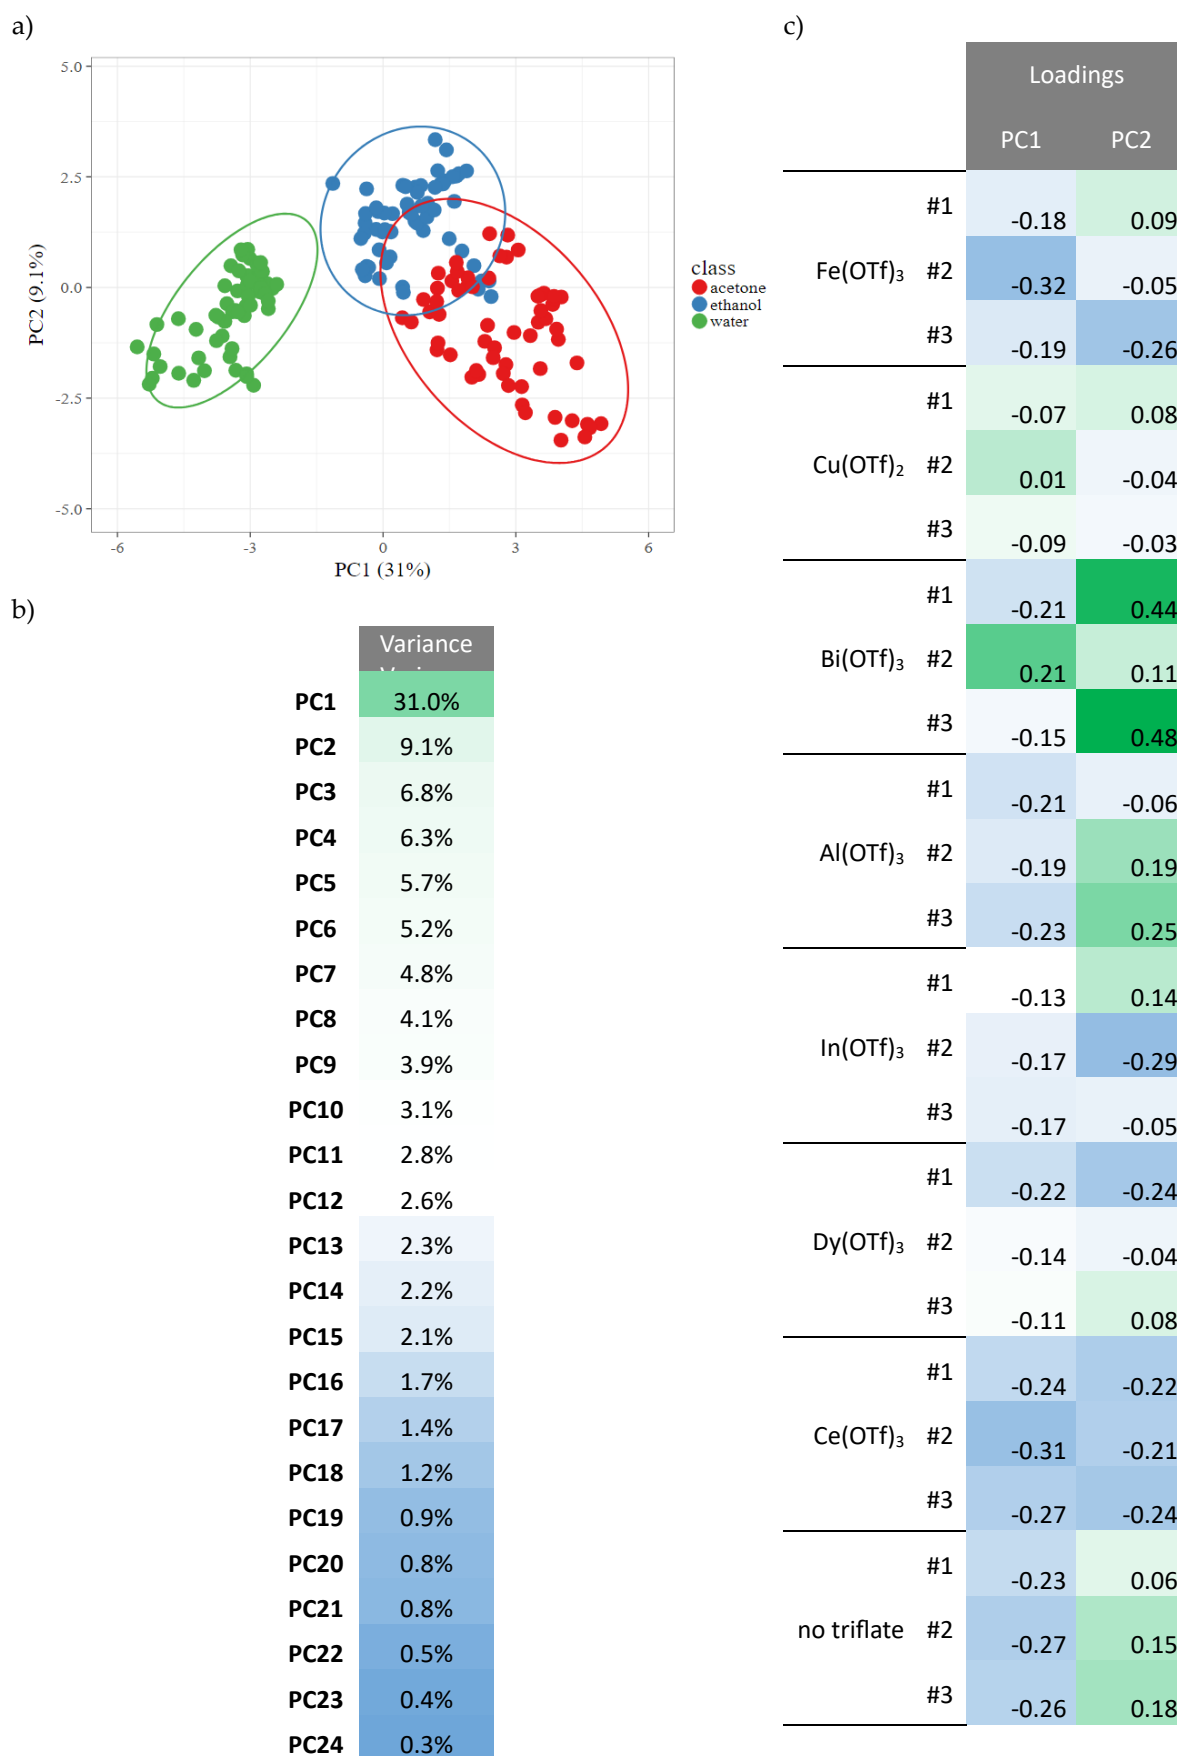

**Figure S24.** PCA on  $\alpha_2$ , for R is measured at different time interval [50s;59s] | **a**, PCA scores with 95% confidence ellipsoids. **b**, Individual variance for the different PC. **c**, PCA loadings of the different sensing elements' response for PC1 and PC2.

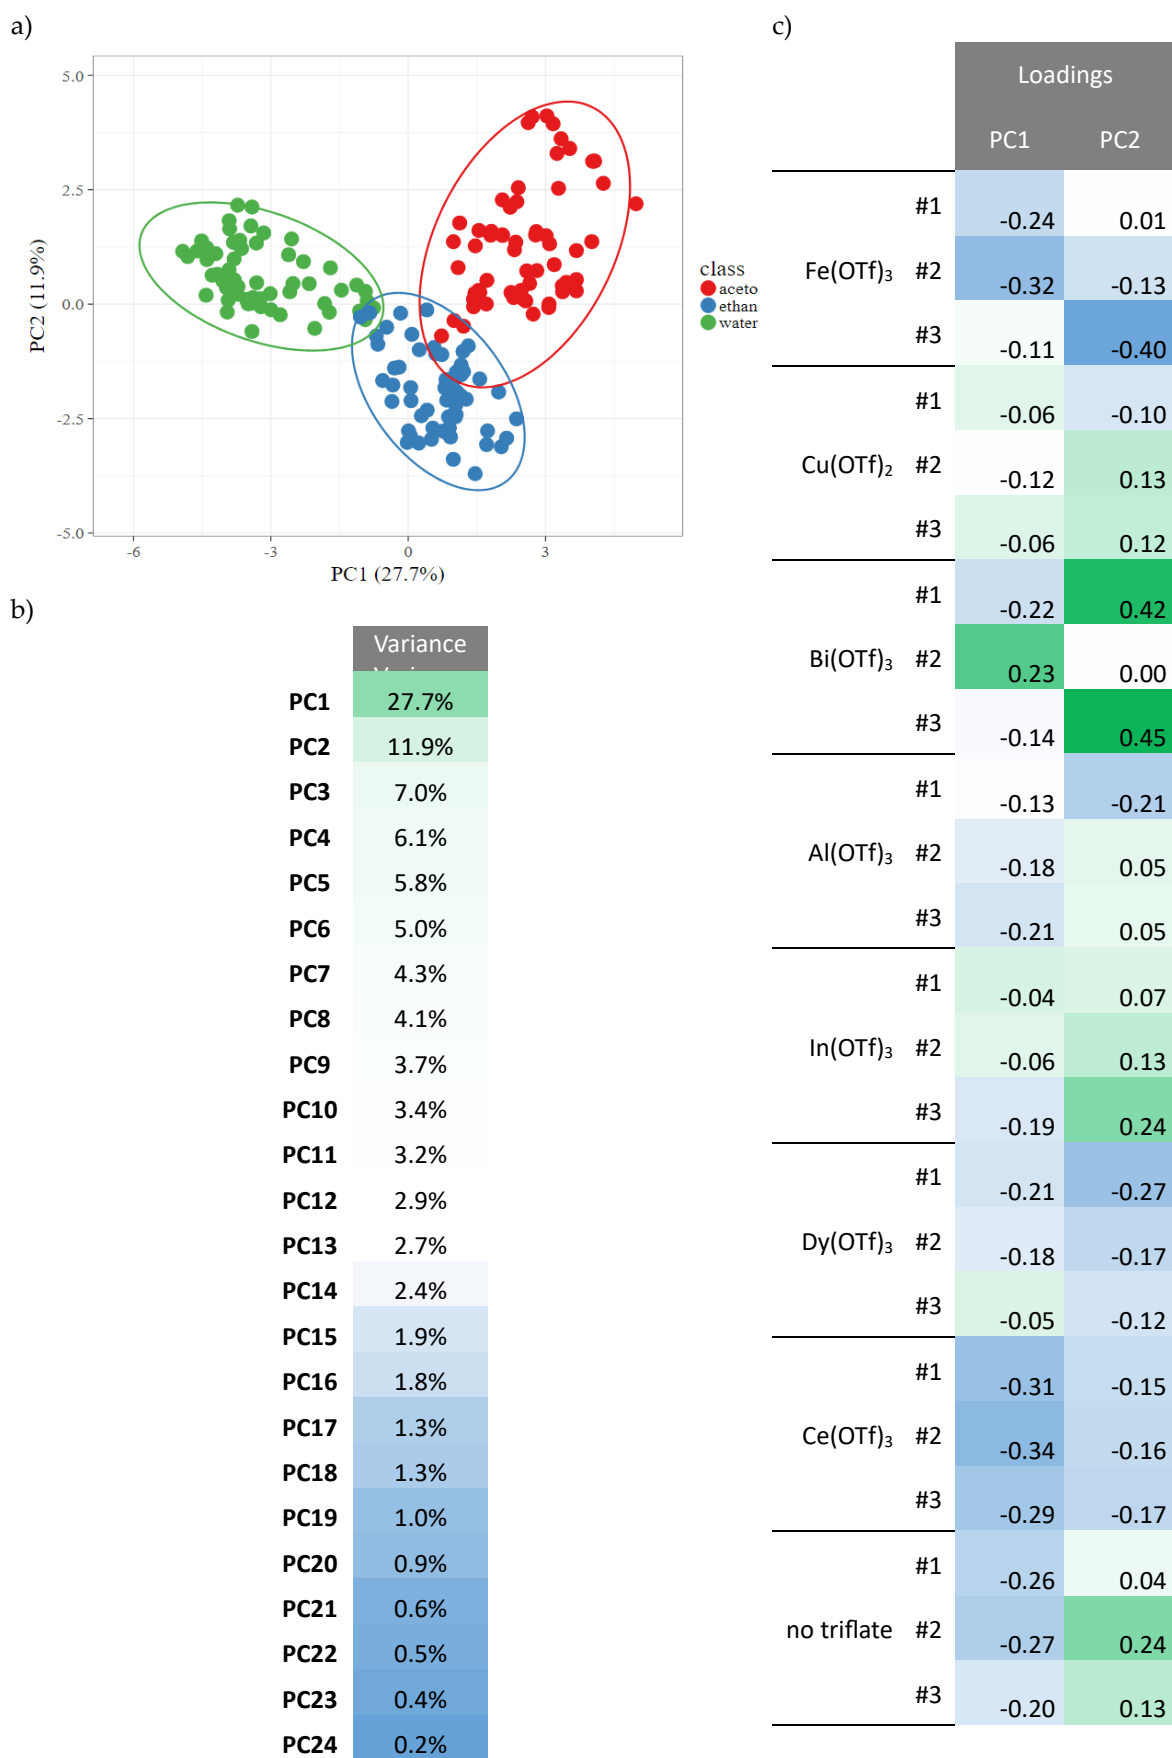

**Figure S25.** PCA on  $\alpha_2$ , for R is measured at different time interval [60s;69s] | **a**, PCA scores with 95% confidence ellipsoids. **b**, Individual variance for the different PC. **c**, PCA loadings of the different sensing elements' response for PC1 and PC2.

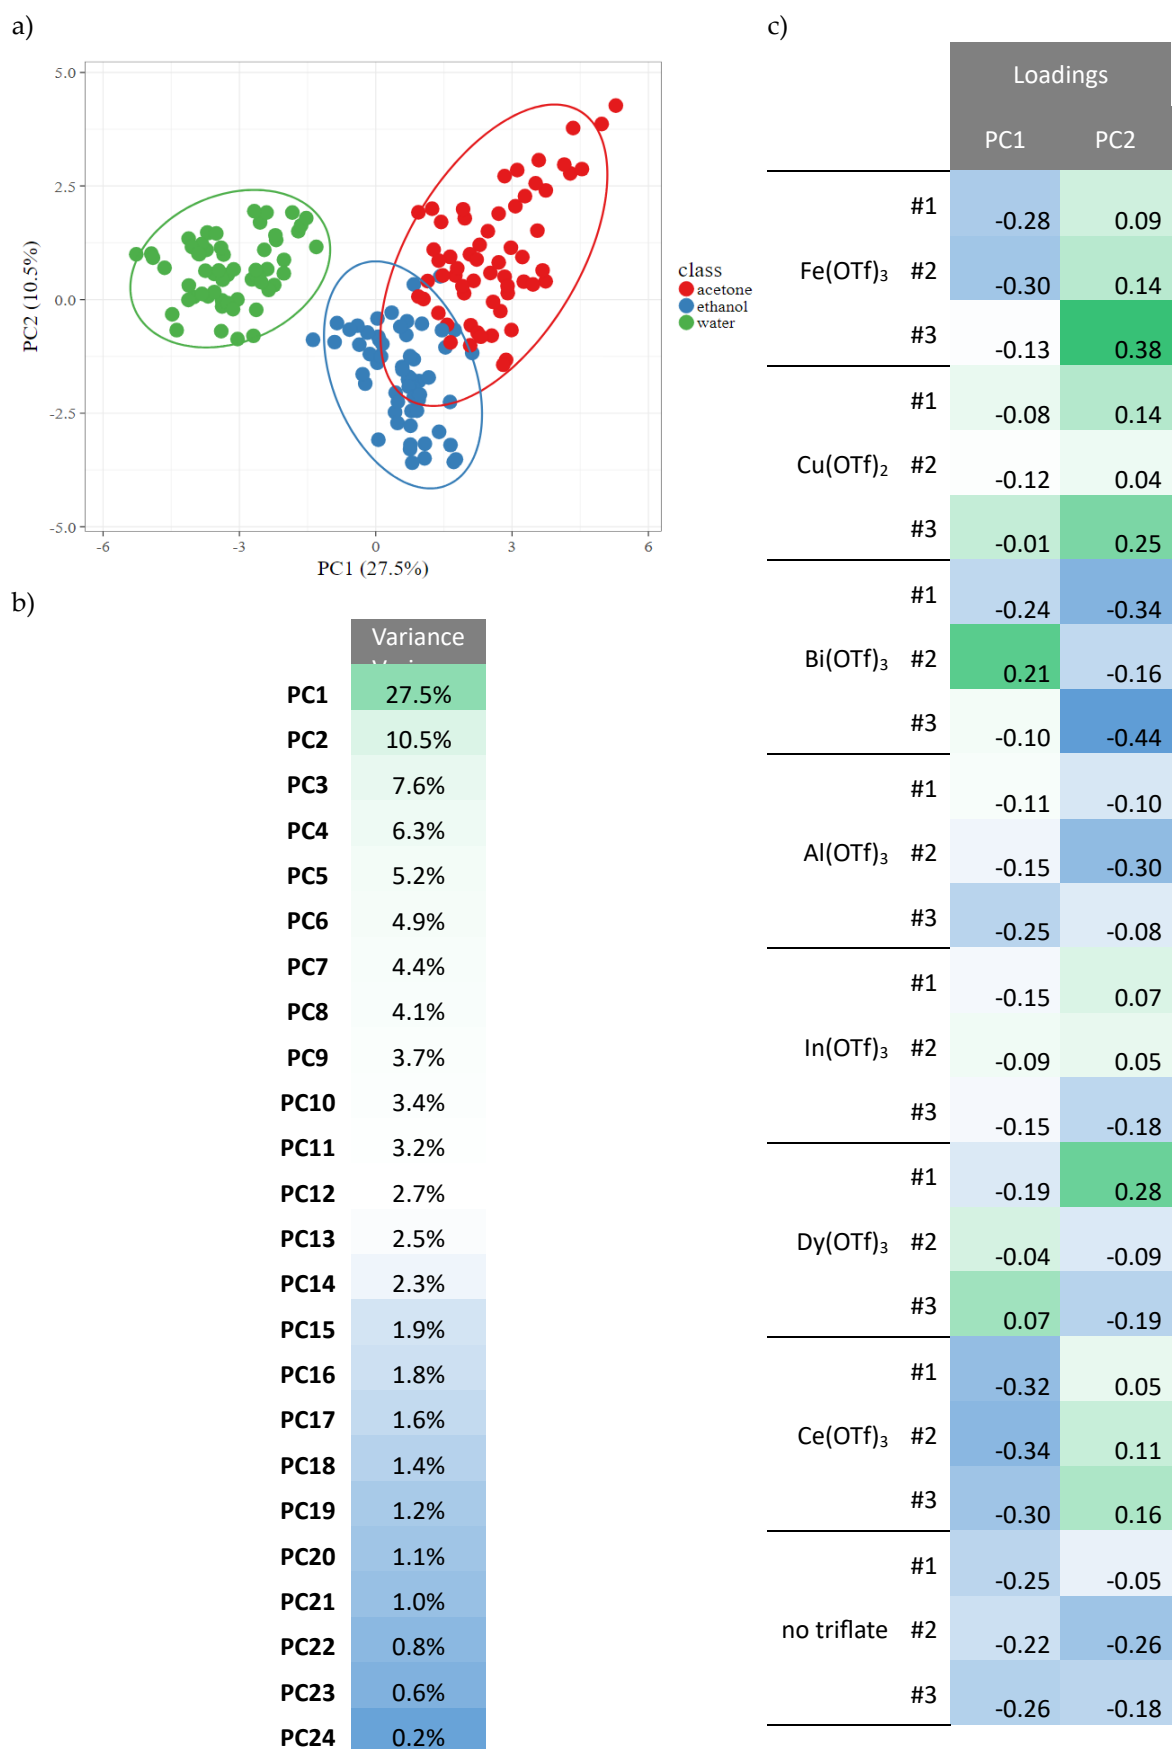

**Figure S26. PCA on  $\alpha_2$ , for R is measured at different time interval [70s;79s] | a, PCA scores with 95% confidence ellipsoids. b, Individual variance for the different PC. c, PCA loadings of the different sensing elements' response for PC1 and PC2.**

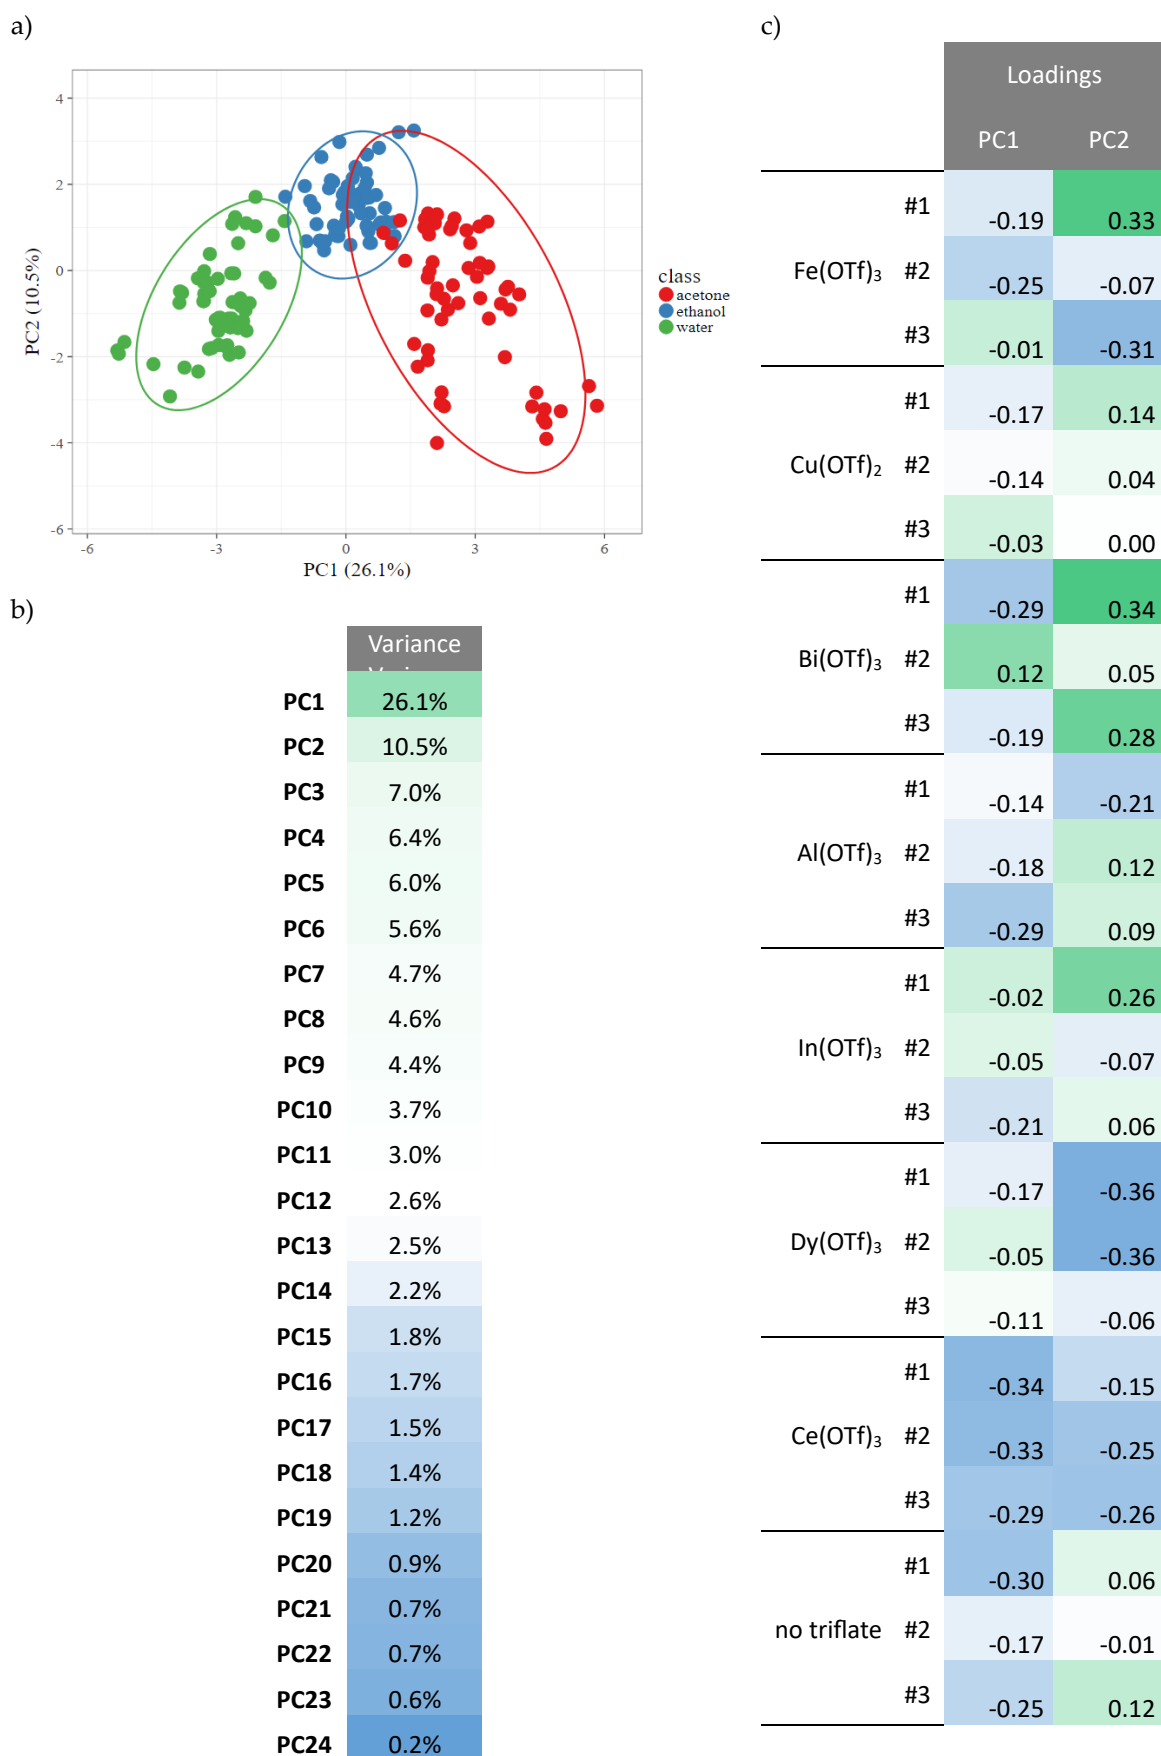

**Figure S27.** PCA on  $\alpha_2$ , for R is measured at different time interval [80s;89s] | **a**, PCA scores with 95% confidence ellipsoids. **b**, Individual variance for the different PC. **c**, PCA loadings of the different sensing elements' response for PC1 and PC2.

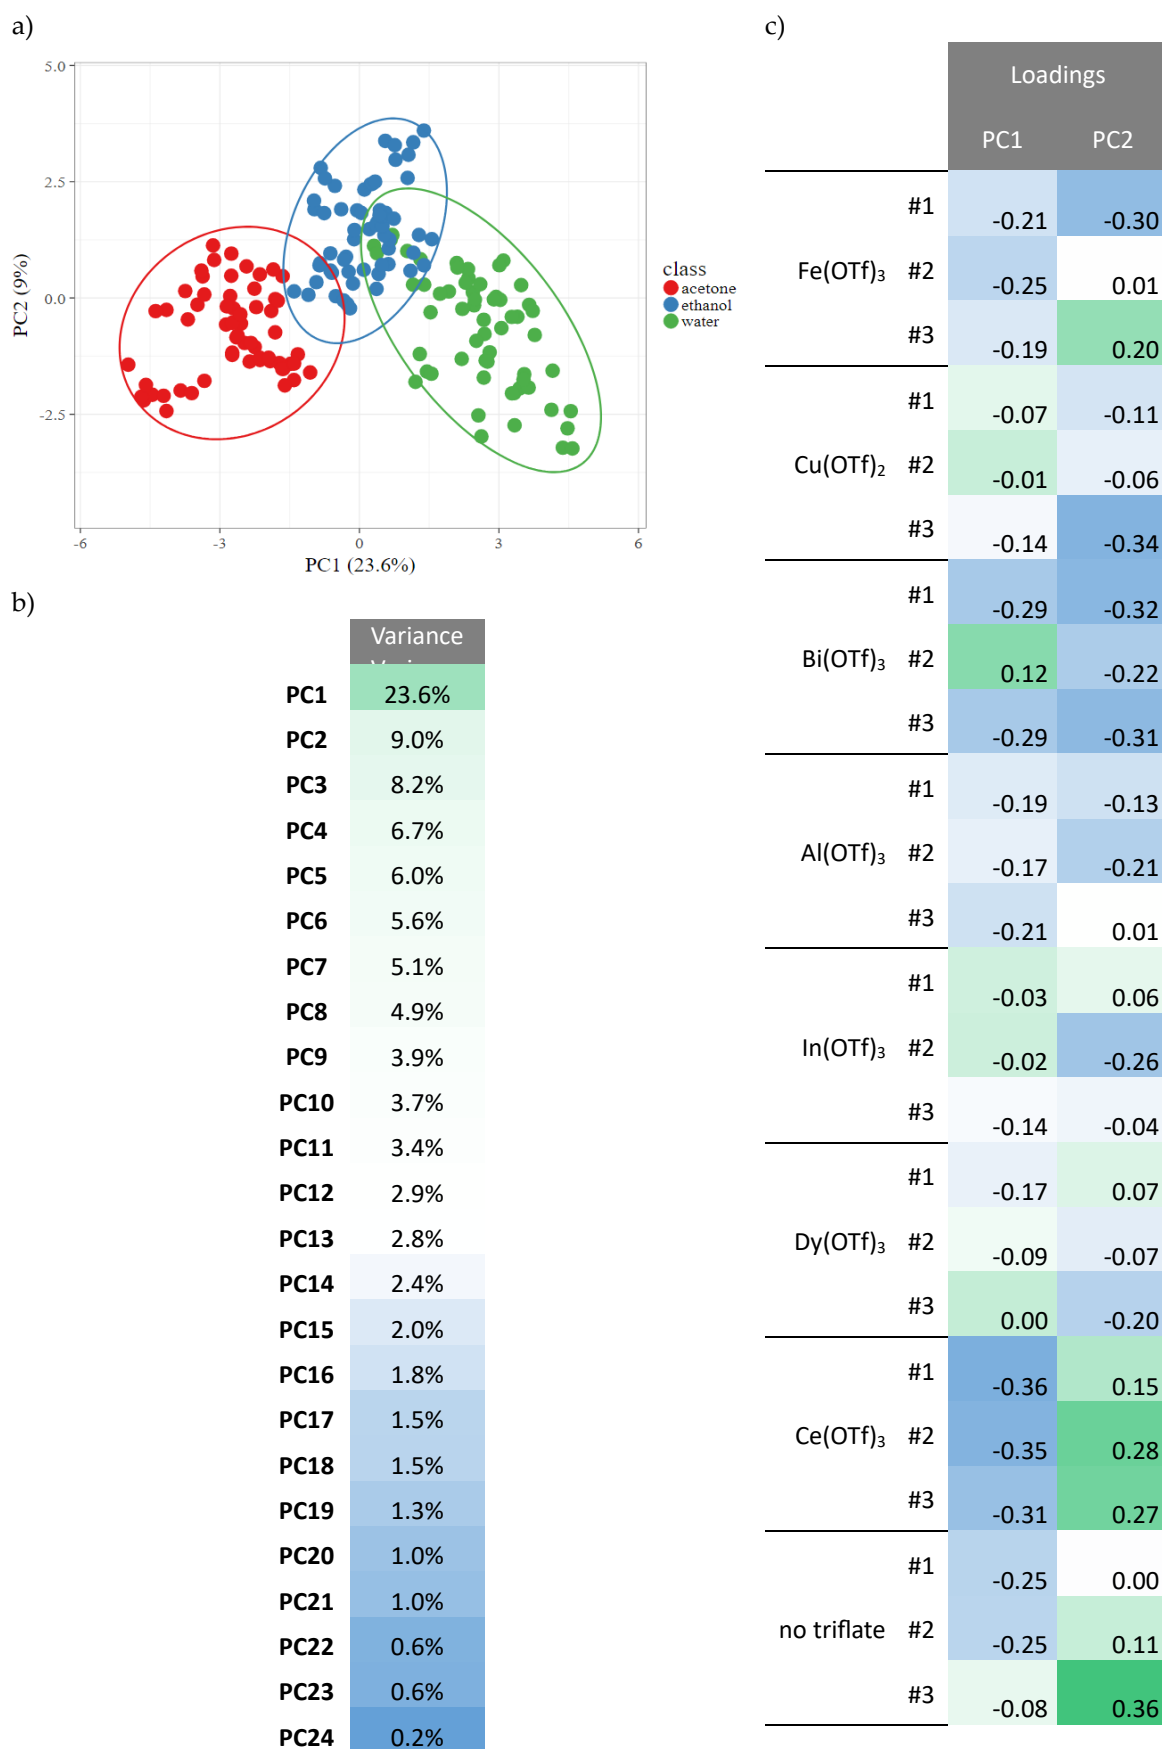

**Figure S28. PCA on  $\alpha_2$ , for R is measured at different time interval [90s;99s] | a, PCA scores with 95% confidence ellipsoids. b, Individual variance for the different PC. c, PCA loadings of the different sensing elements' response for PC1 and PC2.**

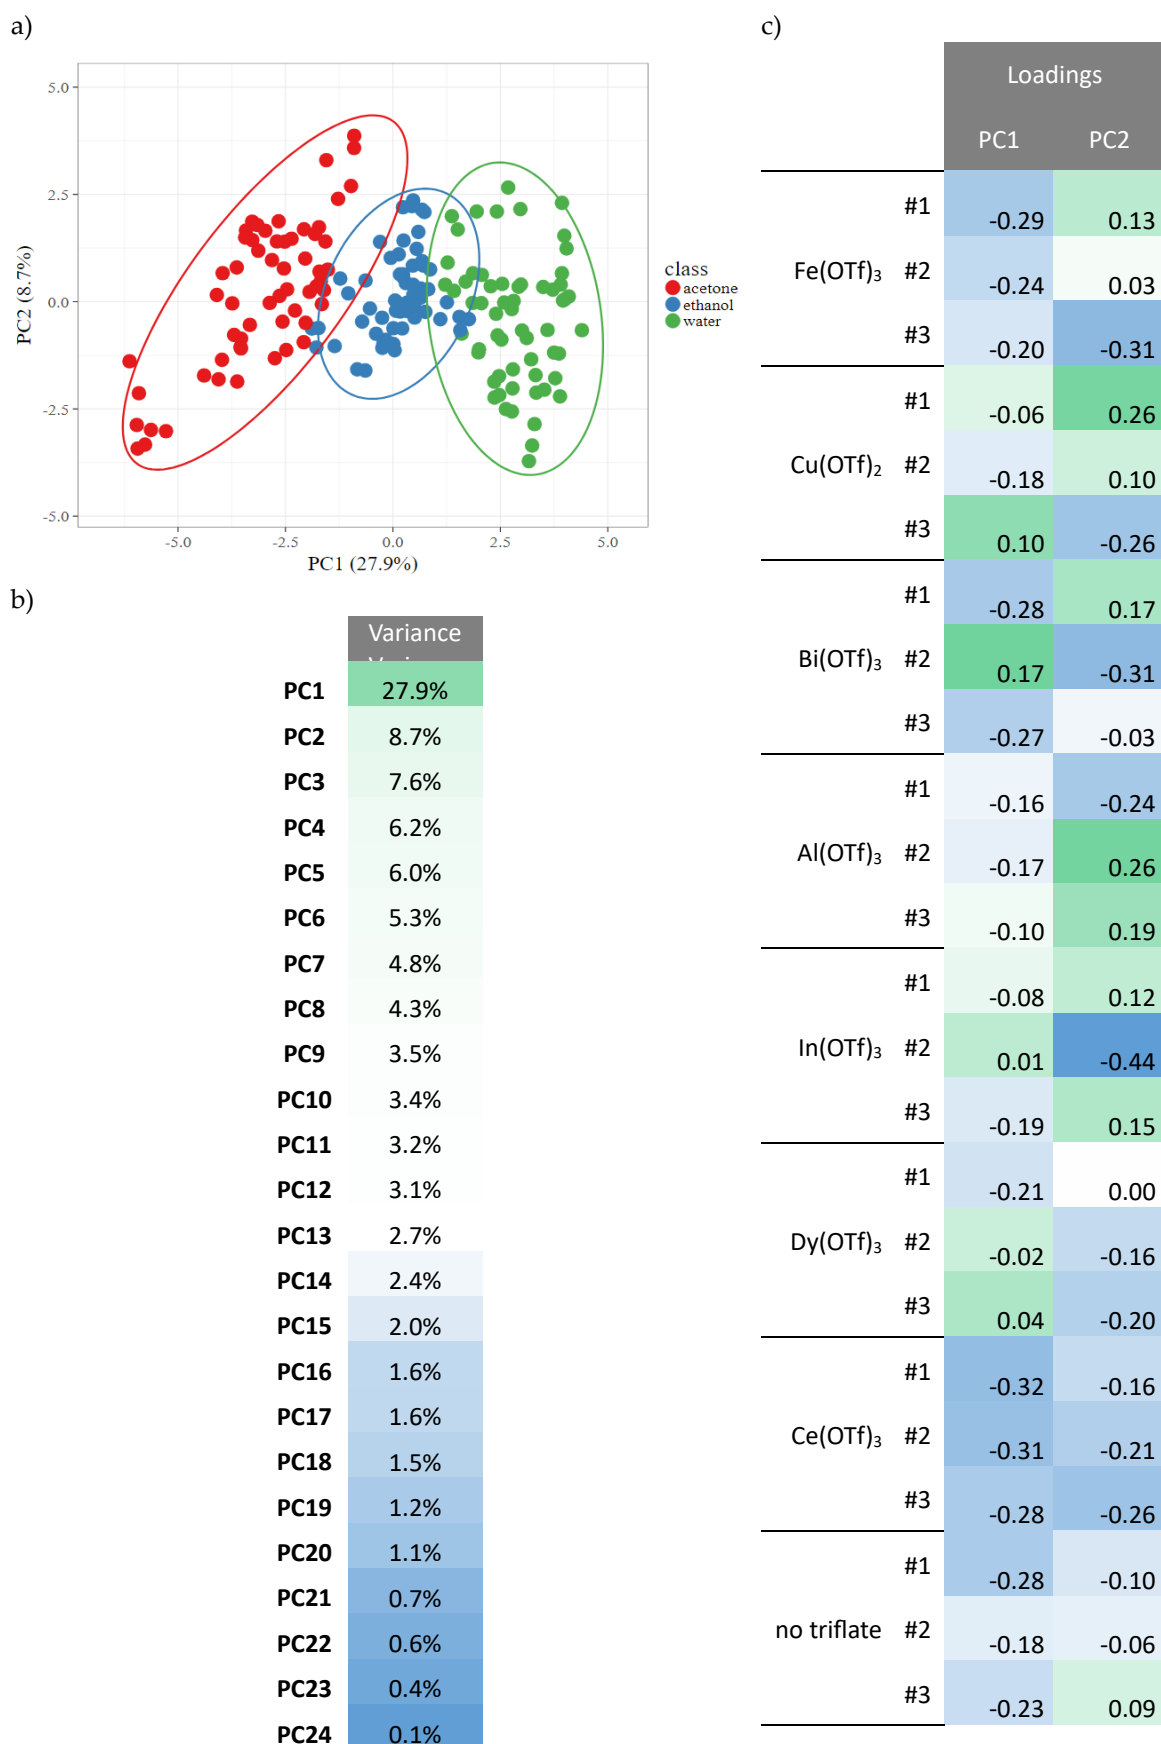

**Figure S29.** PCA on  $\alpha_2$ , for R is measured at different time interval [100s;109s] | **a**, PCA scores with 95% confidence ellipsoids. **b**, Individual variance for the different PC. **c**, PCA loadings of the different sensing elements' response for PC1 and PC2.

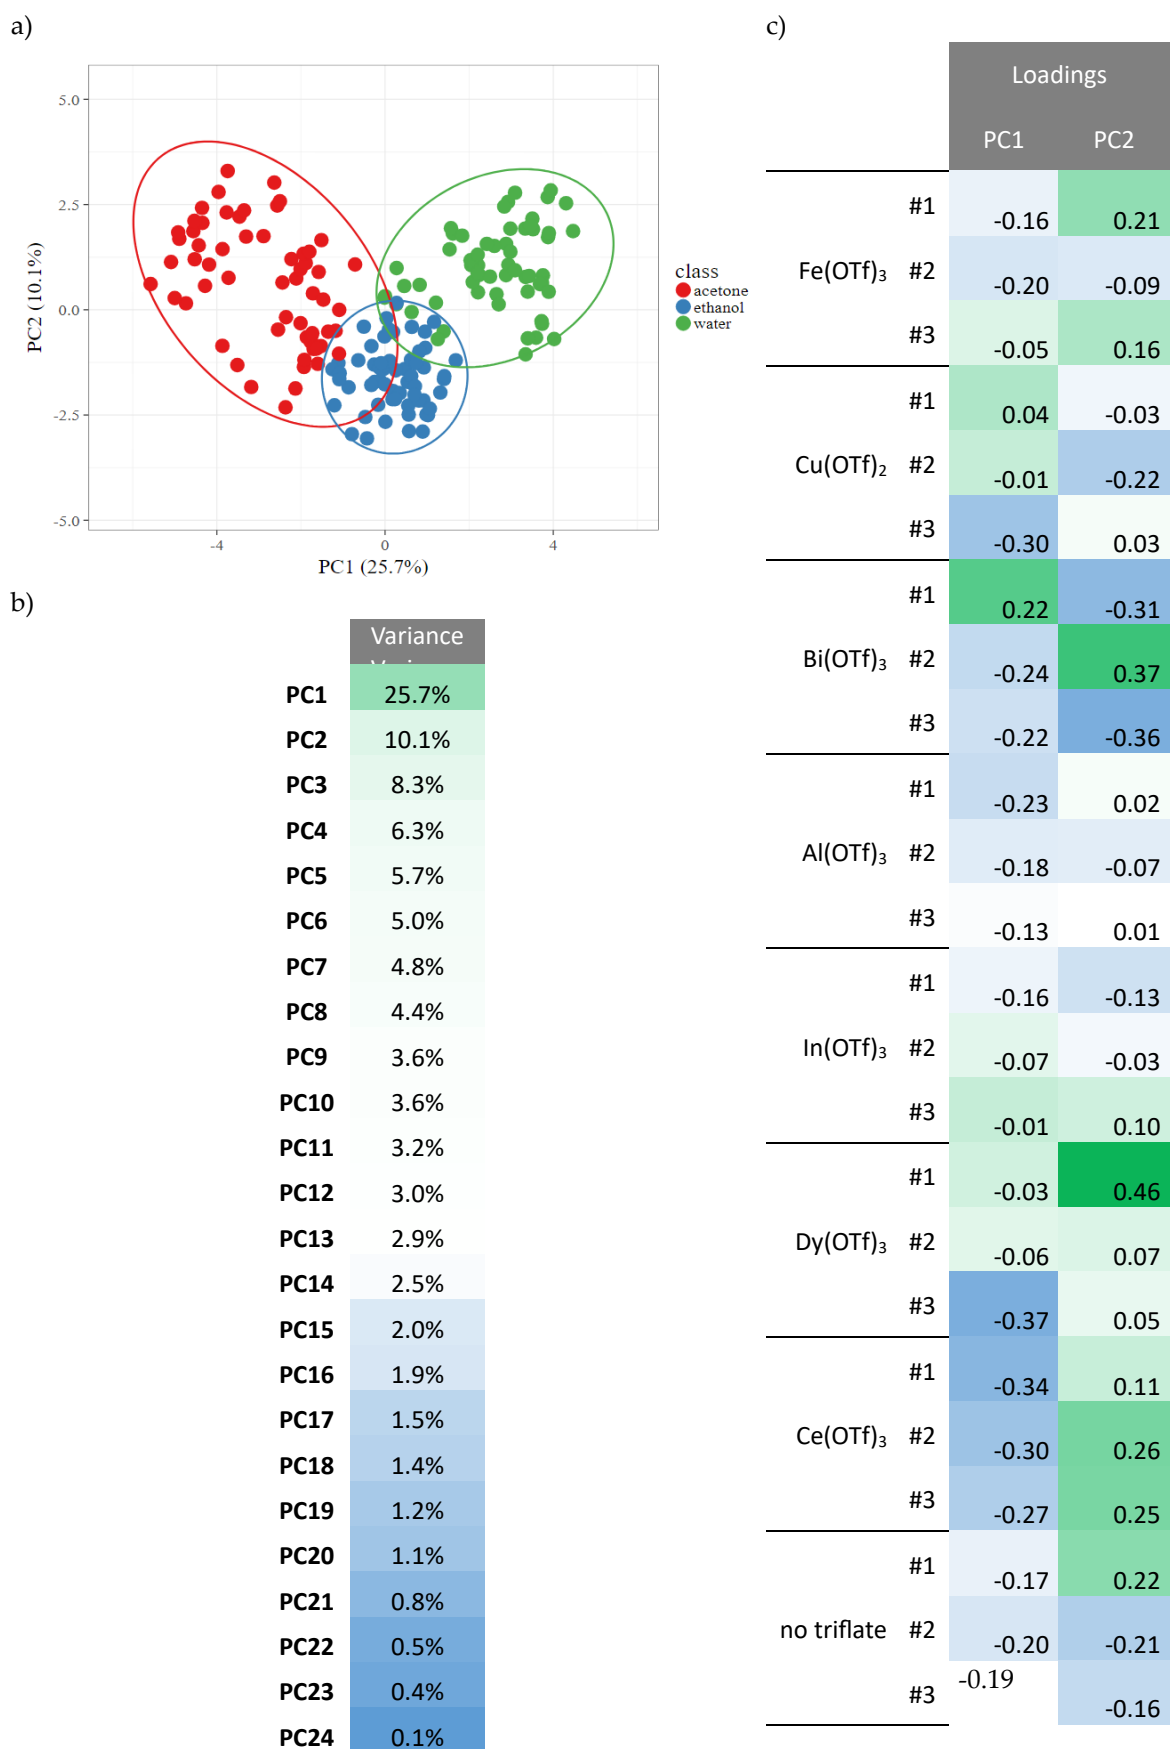

**Figure S30. PCA on  $\alpha_2$ , for R is measured at different time interval [110s;119s] | a, PCA scores with 95% confidence ellipsoids. b, Individual variance for the different PC. c, PCA loadings of the different sensing elements' response for PC1 and PC2.**

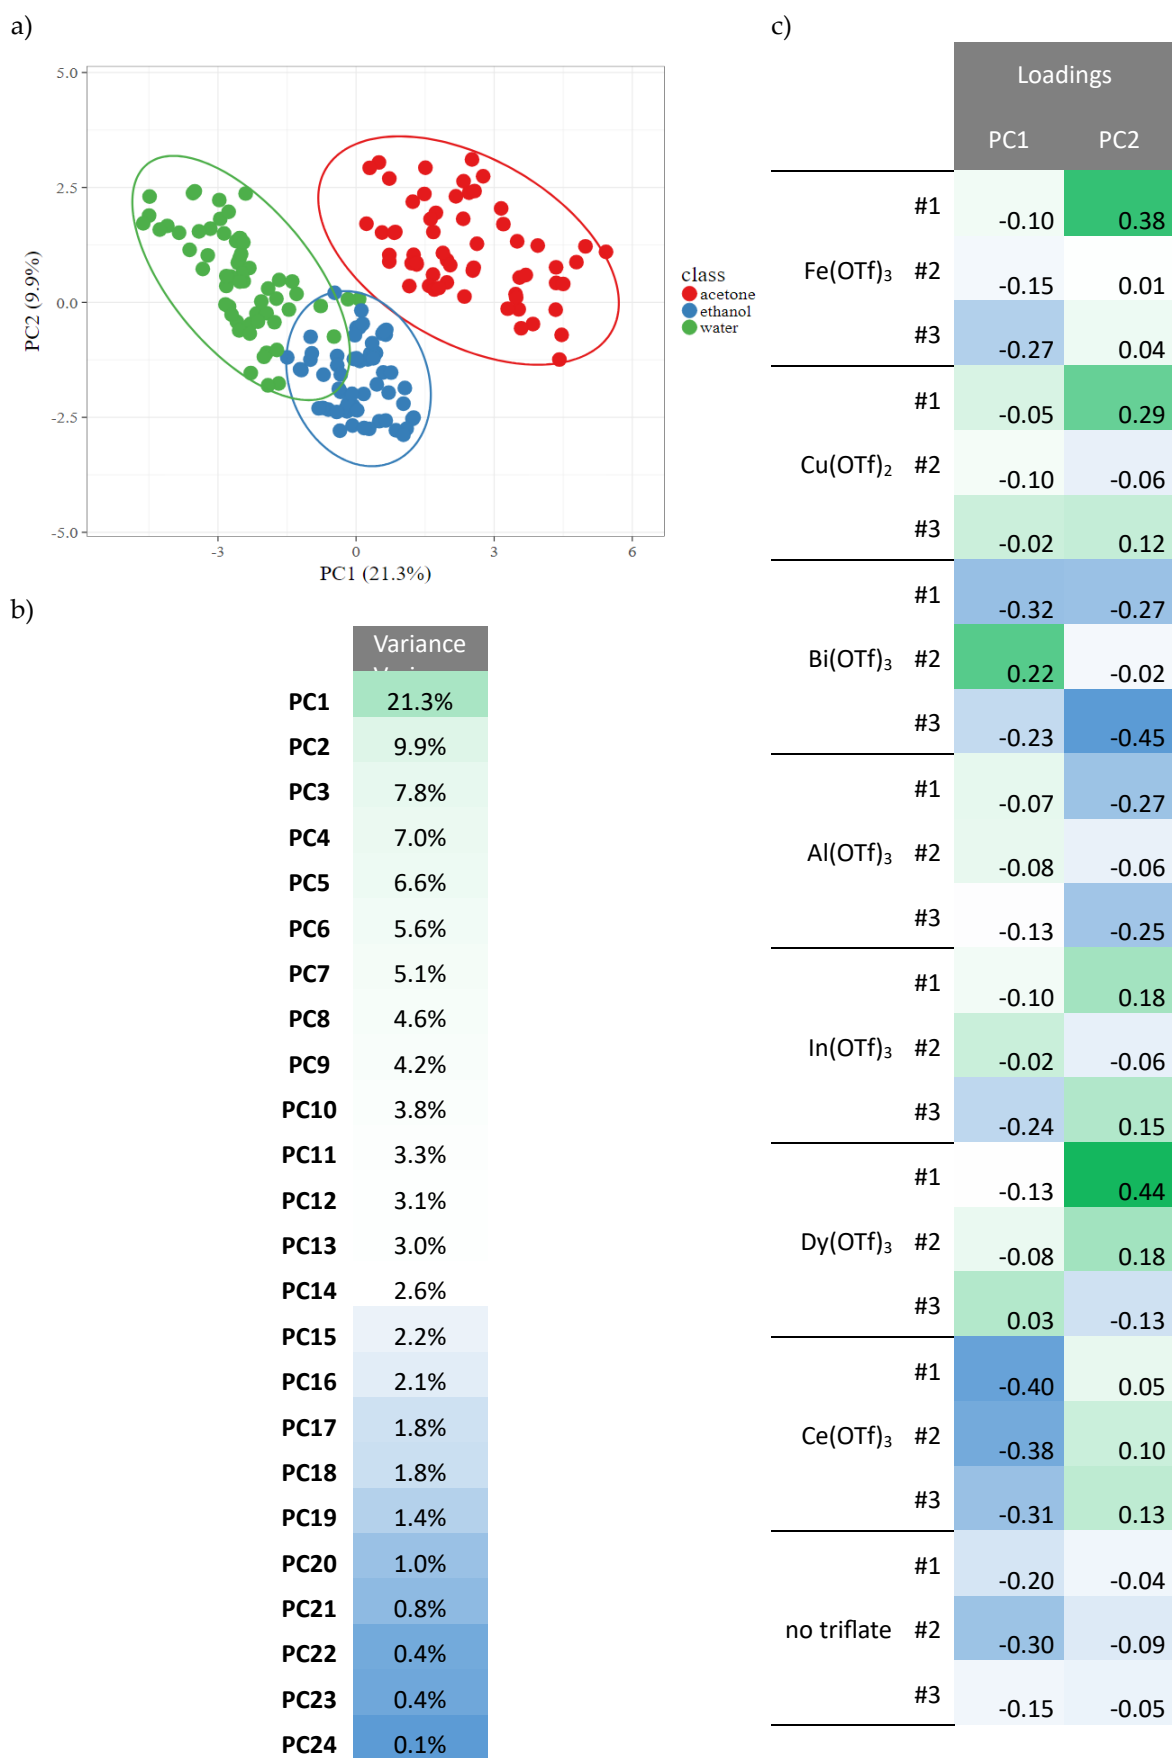

**Figure S31. PCA on  $\alpha_2$ , for R is measured at different time interval [120s;129s] | a, PCA scores with 95% confidence ellipsoids. b, Individual variance for the different PC. c, PCA loadings of the different sensing elements' response for PC1 and PC2.**



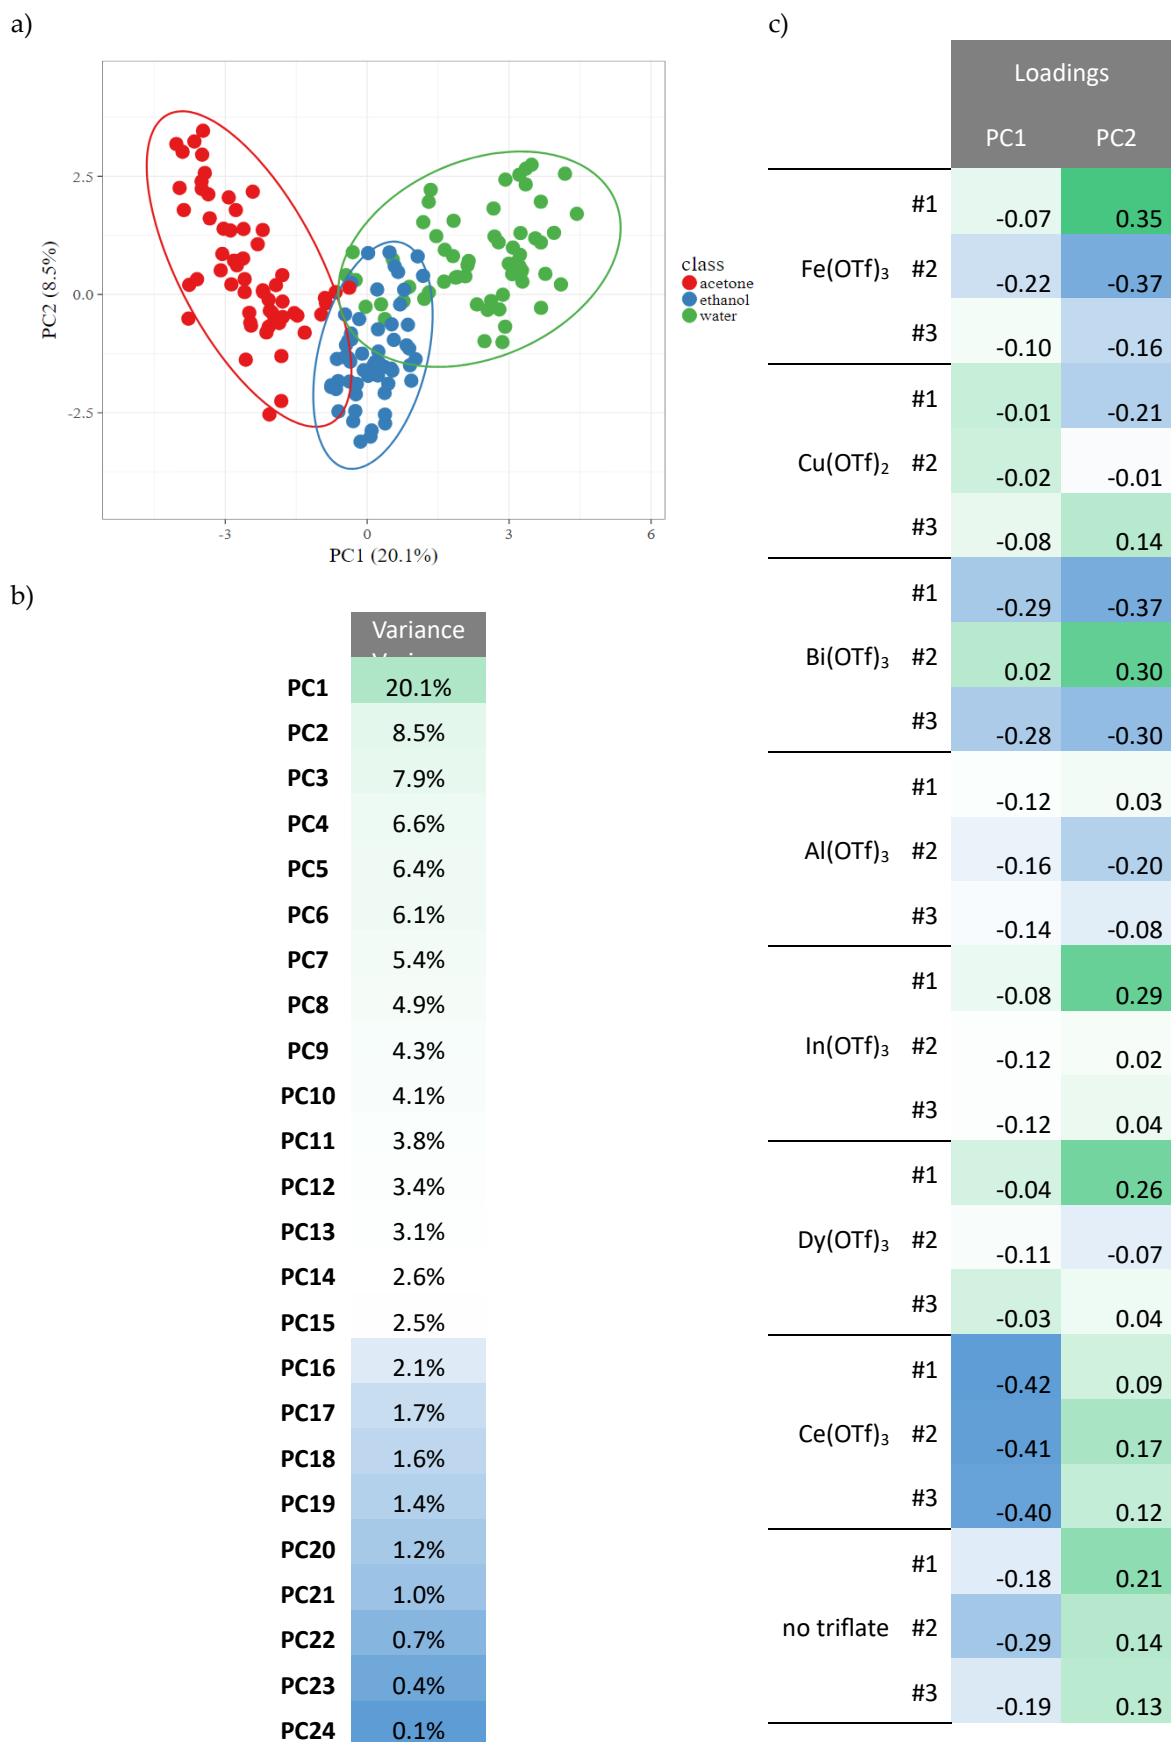

**Figure S32.** PCA on  $\alpha_2$ , for R is measured at different time interval [130s;139s] | **a**, PCA scores with 95% confidence ellipsoids. **b**, Individual variance for the different PC. **c**, PCA loadings of the different sensing elements' response for PC1 and PC2.

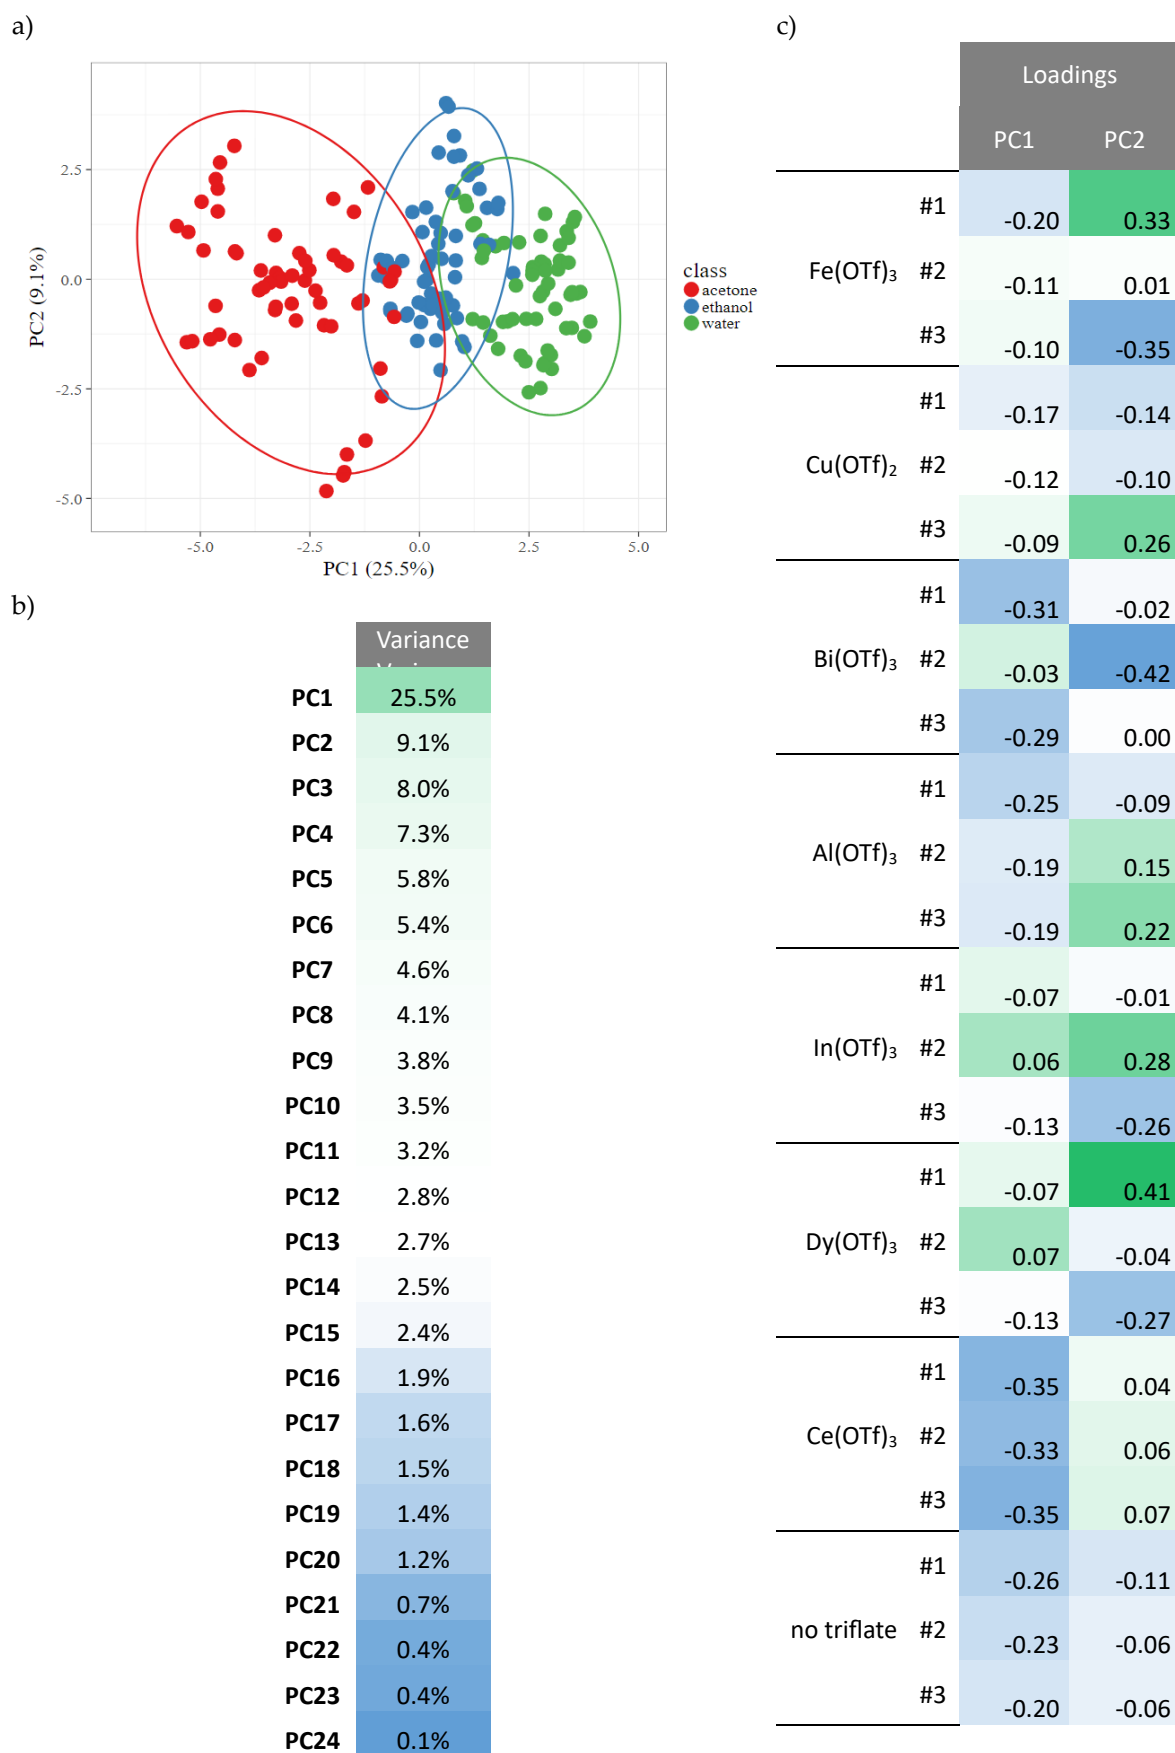

**Figure S33. PCA on  $\alpha_2$ , for R is measured at different time interval [140s;149s] | a, PCA scores with 95% confidence ellipsoids. b, Individual variance for the different PC. c, PCA loadings of the different sensing elements' response for PC1 and PC2.**

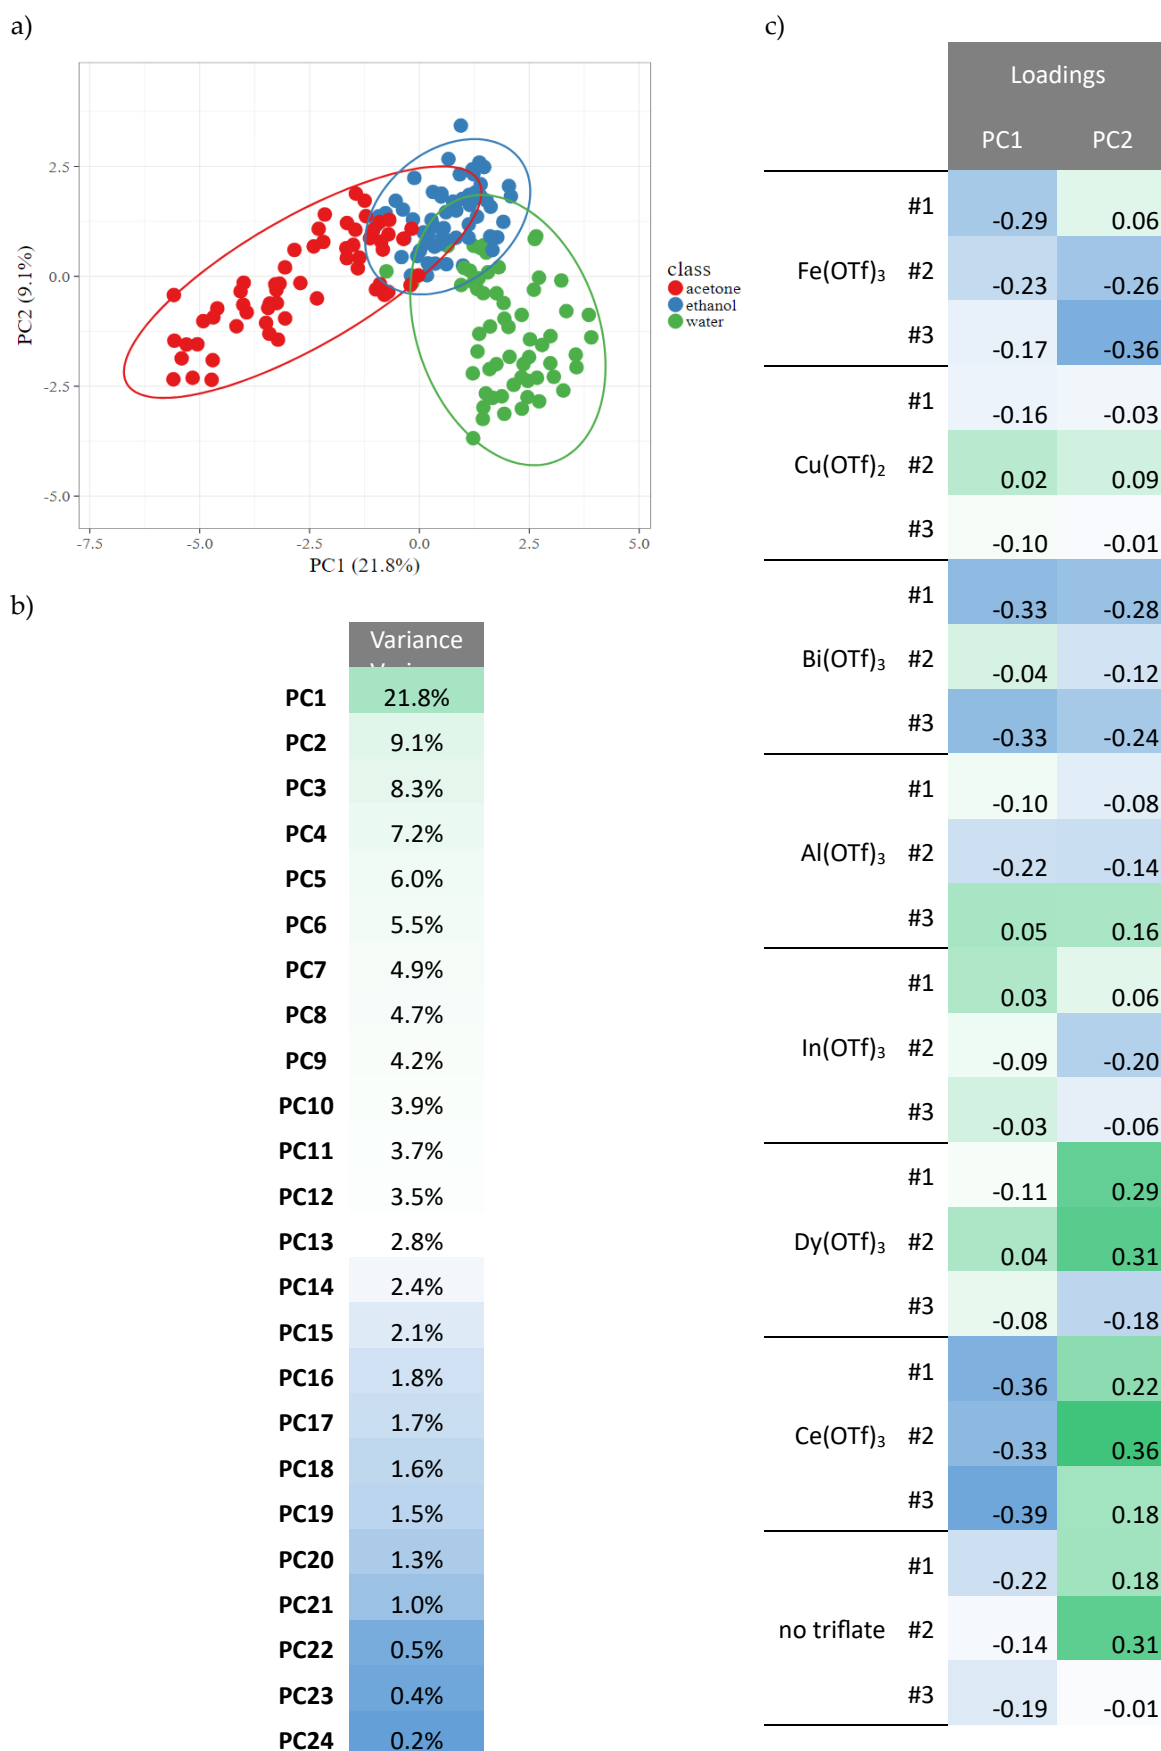

**Figure S34. PCA on  $\alpha_2$ , for R is measured at different time interval [150s;159s] | a, PCA scores with 95% confidence ellipsoids. b, Individual variance for the different PC. c, PCA loadings of the different sensing elements' response for PC1 and PC2.**

a)

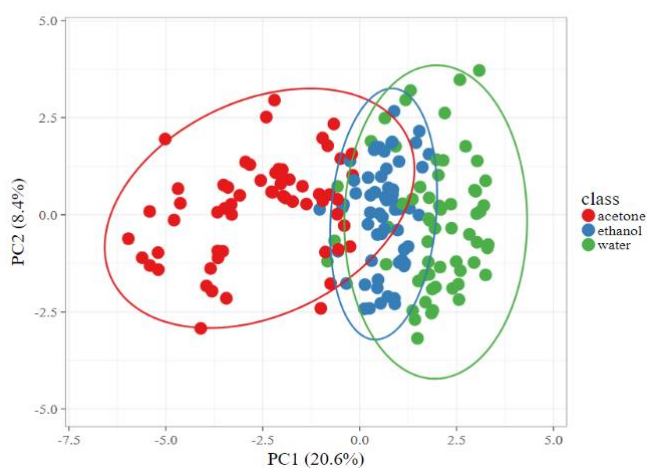

b)

|      | Variance |
|------|----------|
| PC1  | 20.6%    |
| PC2  | 8.4%     |
| PC3  | 8.2%     |
| PC4  | 7.0%     |
| PC5  | 6.0%     |
| PC6  | 5.4%     |
| PC7  | 5.2%     |
| PC8  | 5.0%     |
| PC9  | 4.3%     |
| PC10 | 3.8%     |
| PC11 | 3.5%     |
| PC12 | 3.1%     |
| PC13 | 3.0%     |
| PC14 | 2.6%     |
| PC15 | 2.3%     |
| PC16 | 2.2%     |
| PC17 | 2.1%     |
| PC18 | 1.8%     |
| PC19 | 1.6%     |
| PC20 | 1.4%     |
| PC21 | 1.2%     |
| PC22 | 0.6%     |
| PC23 | 0.4%     |
| PC24 | 0.3%     |

c)

|                      |    | Loadings |       |
|----------------------|----|----------|-------|
|                      |    | PC1      | PC2   |
| Fe(OTf) <sub>3</sub> | #1 | 0.18     | -0.21 |
|                      | #2 | 0.16     | 0.14  |
|                      | #3 | 0.23     | 0.30  |
| Cu(OTf) <sub>2</sub> | #1 | 0.08     | 0.34  |
|                      | #2 | -0.09    | -0.30 |
|                      | #3 | 0.13     | -0.07 |
| Bi(OTf) <sub>3</sub> | #1 | 0.34     | 0.01  |
|                      | #2 | 0.09     | 0.12  |
|                      | #3 | 0.30     | -0.08 |
| Al(OTf) <sub>3</sub> | #1 | 0.10     | -0.32 |
|                      | #2 | 0.17     | -0.16 |
|                      | #3 | 0.15     | 0.18  |
| In(OTf) <sub>3</sub> | #1 | 0.08     | -0.04 |
|                      | #2 | 0.08     | -0.40 |
|                      | #3 | 0.13     | -0.07 |
| Dy(OTf) <sub>3</sub> | #1 | 0.07     | -0.04 |
|                      | #2 | 0.06     | -0.20 |
|                      | #3 | -0.02    | -0.20 |
| Ce(OTf) <sub>3</sub> | #1 | 0.39     | -0.06 |
|                      | #2 | 0.38     | -0.14 |
|                      | #3 | 0.39     | -0.10 |
| no triflate          | #1 | 0.17     | 0.01  |
|                      | #2 | 0.20     | 0.37  |
|                      | #3 | 0.18     | 0.19  |

**Figure S35.** PCA on  $\alpha_2$ , for R is measured at different time interval [160s;169s] | **a**, PCA scores with 95% confidence ellipsoids. **b**, Individual variance for the different PC. **c**, PCA loadings of the different sensing elements' response for PC1 and PC2.

a)

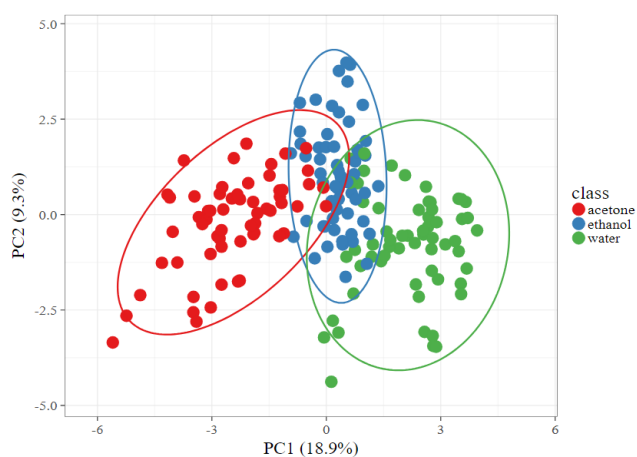

b)

|      | Variance |
|------|----------|
| PC1  | 18.9%    |
| PC2  | 9.3%     |
| PC3  | 8.0%     |
| PC4  | 6.8%     |
| PC5  | 6.6%     |
| PC6  | 6.0%     |
| PC7  | 5.2%     |
| PC8  | 5.1%     |
| PC9  | 4.3%     |
| PC10 | 4.1%     |
| PC11 | 3.9%     |
| PC12 | 3.3%     |
| PC13 | 3.1%     |
| PC14 | 2.6%     |
| PC15 | 2.2%     |
| PC16 | 2.0%     |
| PC17 | 1.8%     |
| PC18 | 1.7%     |
| PC19 | 1.4%     |
| PC20 | 1.2%     |
| PC21 | 1.0%     |
| PC22 | 0.6%     |
| PC23 | 0.5%     |
| PC24 | 0.3%     |

c)

|                      |    | Loadings |       |
|----------------------|----|----------|-------|
|                      |    | PC1      | PC2   |
| Fe(OTf) <sub>3</sub> | #1 | -0.20    | -0.06 |
|                      | #2 | -0.10    | 0.40  |
|                      | #3 | -0.17    | 0.16  |
| Cu(OTf) <sub>2</sub> | #1 | -0.12    | 0.33  |
|                      | #2 | -0.07    | -0.11 |
|                      | #3 | -0.11    | 0.02  |
| Bi(OTf) <sub>3</sub> | #1 | -0.33    | -0.18 |
|                      | #2 | -0.18    | -0.32 |
|                      | #3 | -0.35    | -0.12 |
| Al(OTf) <sub>3</sub> | #1 | -0.03    | -0.13 |
|                      | #2 | -0.06    | -0.28 |
|                      | #3 | -0.11    | -0.32 |
| In(OTf) <sub>3</sub> | #1 | 0.03     | 0.27  |
|                      | #2 | -0.10    | 0.00  |
|                      | #3 | 0.01     | -0.33 |
| Dy(OTf) <sub>3</sub> | #1 | -0.14    | 0.09  |
|                      | #2 | -0.14    | 0.02  |
|                      | #3 | 0.07     | 0.02  |
| Ce(OTf) <sub>3</sub> | #1 | -0.42    | 0.02  |
|                      | #2 | -0.42    | 0.11  |
|                      | #3 | -0.40    | 0.00  |
| no triflate          | #1 | -0.04    | -0.15 |
|                      | #2 | -0.06    | 0.08  |
|                      | #3 | -0.18    | 0.34  |

**Figure S36.** PCA on  $\alpha_2$ , for R is measured at different time interval [170s;179s] | **a**, PCA scores with 95% confidence ellipsoids. **b**, Individual variance for the different PC. **c**, PCA loadings of the different sensing elements' response for PC1 and PC2.
